# Supplementary material for: ZMYND10 functions in a chaperone relay during axonemal dynein assembly
Source: eLife journal article supplement (doi:10.7554/elife.34389), 2018-06-19

# Axonemal Dynein Heavy Chains

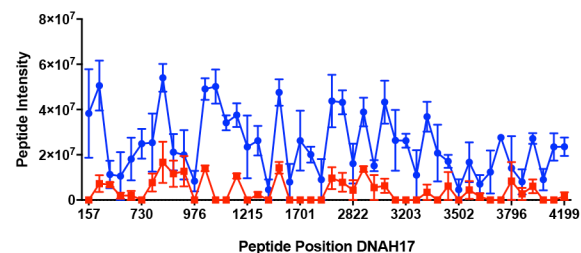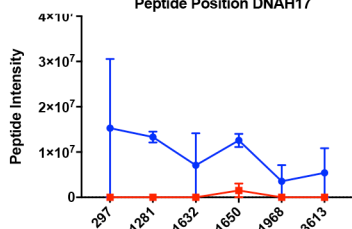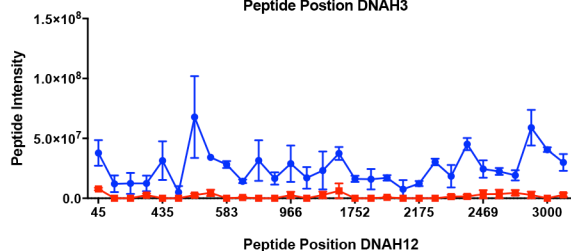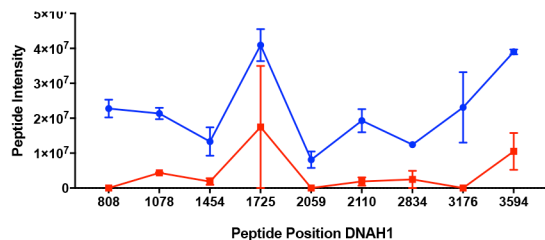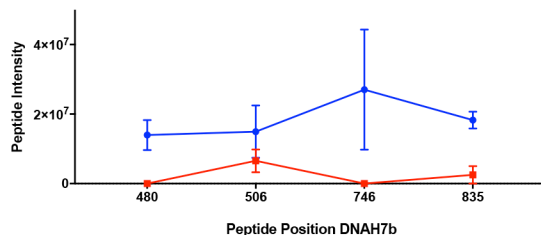

# Cytoplasmic Dynein Heavy Chains

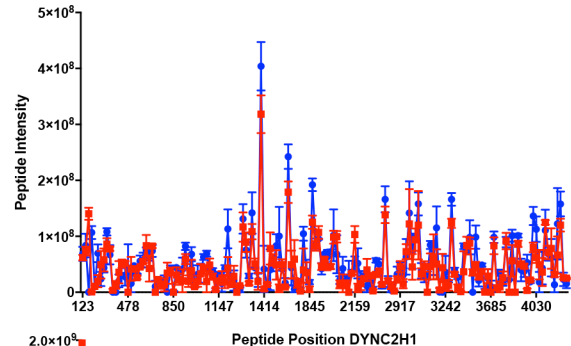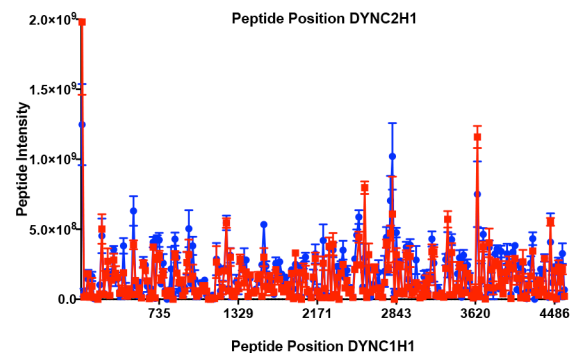

# Axonemal Outer Dynein Intermediate Chains

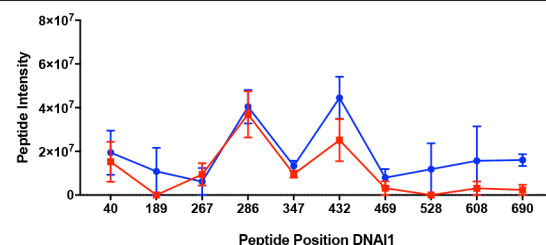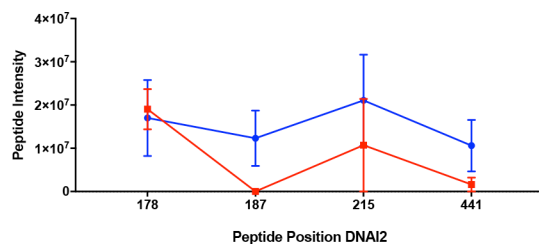

# Outer Dynein Arm Docking Complex

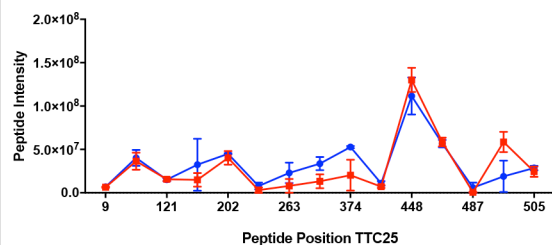

# Dynein Light Chain

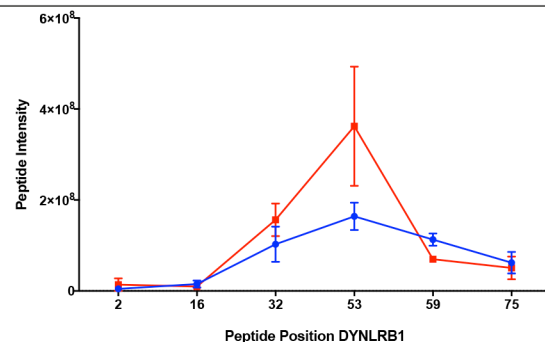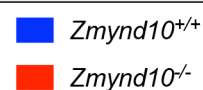

Supplement: supp [file elife-34389-supp-v1.zip]
