# Supplementary material for: ZMYND10 functions in a chaperone relay during axonemal dynein assembly
Source: eLife journal article supplement (doi:10.7554/elife.34389), 2018-06-19

Figure 1

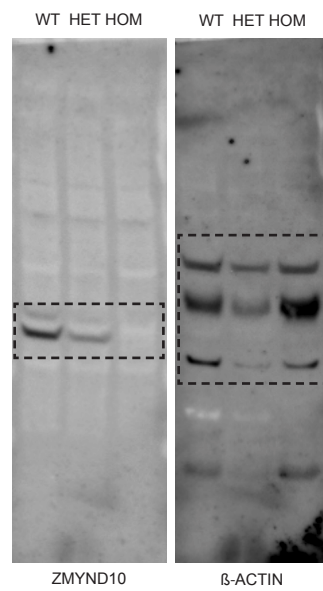

Figure 2A, B

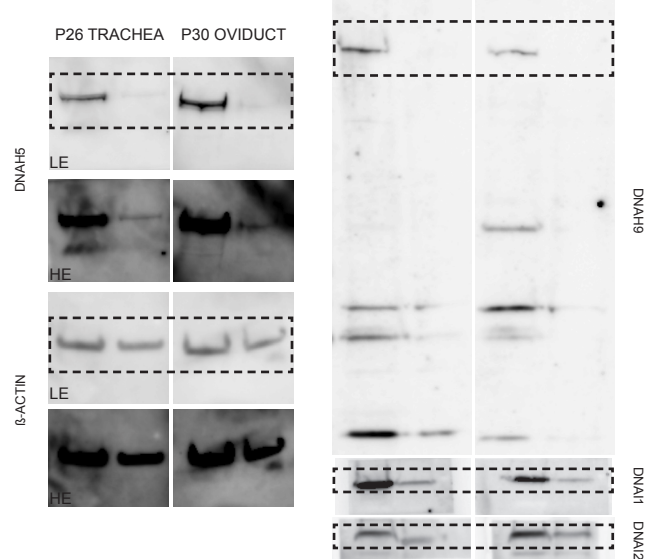

Figure 4C

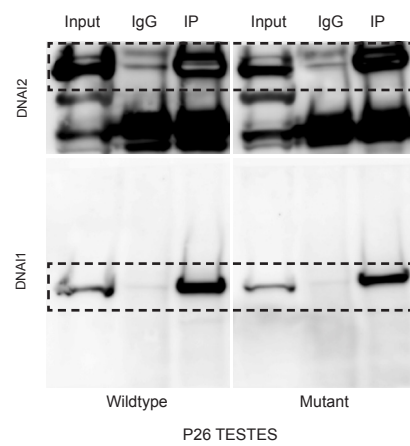

Figure 4D

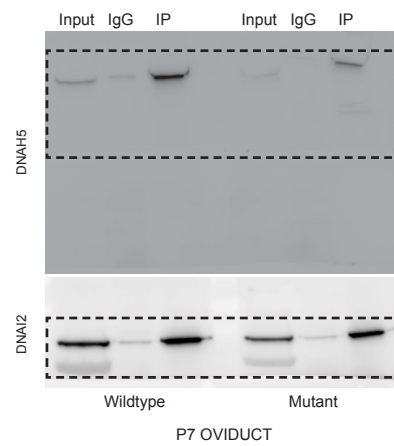

Figure 6B

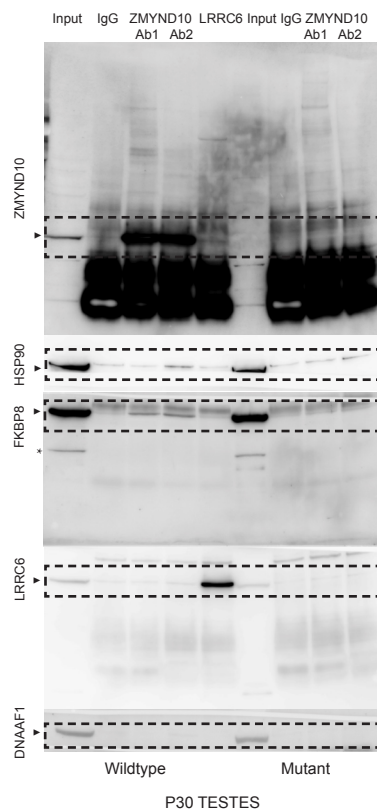

Figure 6C

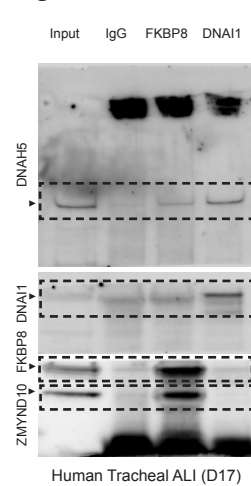

Figure 6D

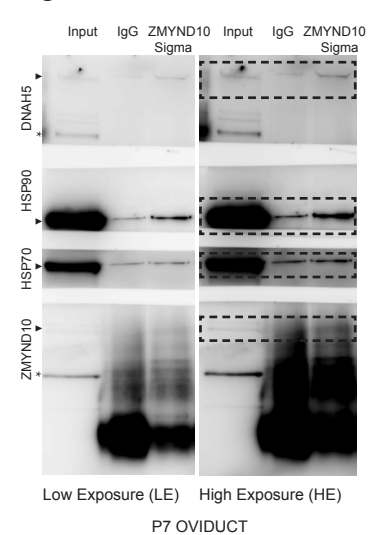

Figure S6.

Figure 7B

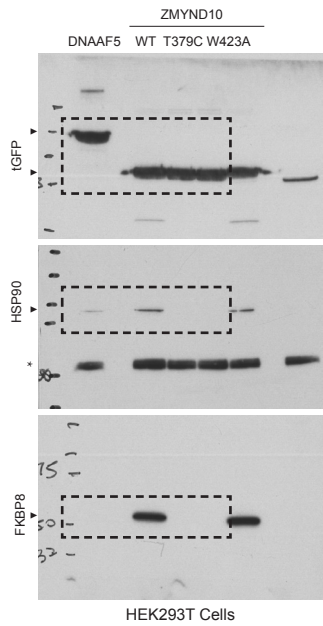

Figure 7C

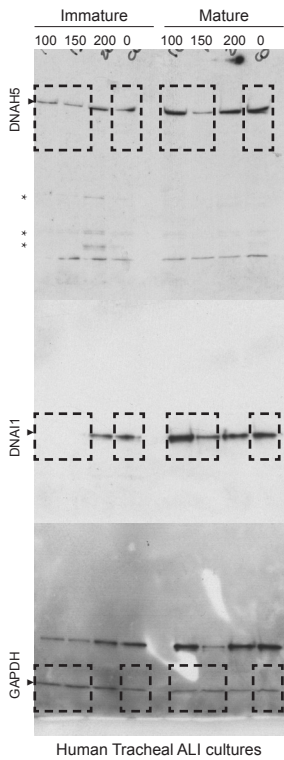

Figure 8A

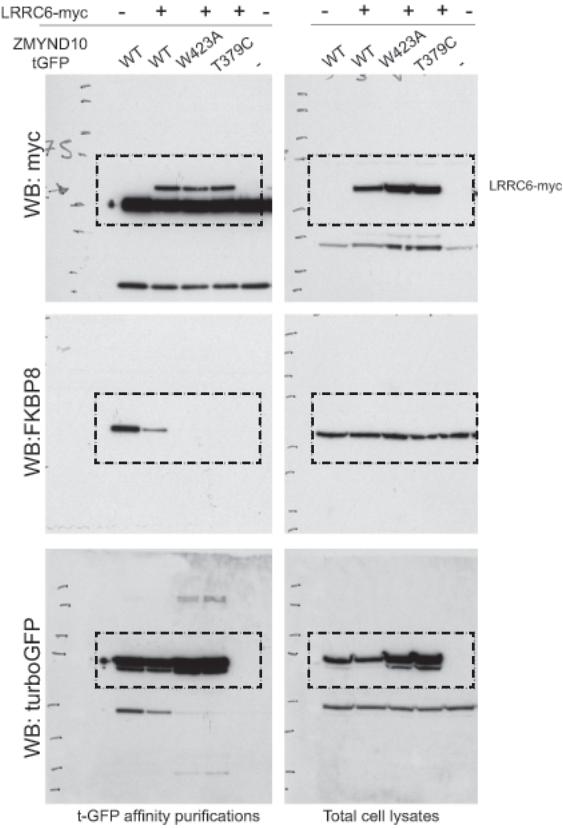

Figure S4B, C

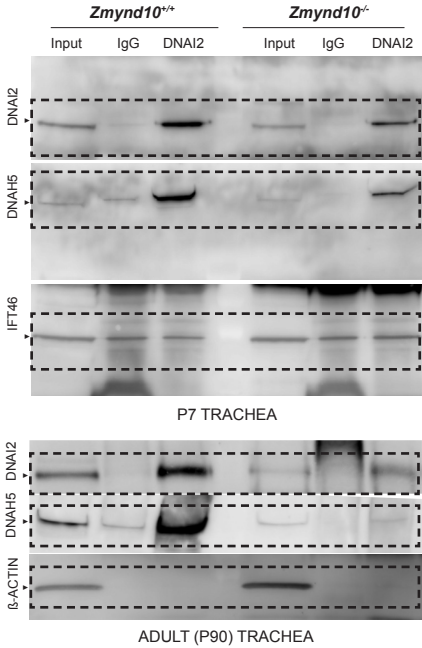

Supplement: supp [file elife-34389-supp-v1.zip]
