# Supplementary material for: ZMYND10 functions in a chaperone relay during axonemal dynein assembly
Source: eLife journal article supplement (doi:10.7554/elife.34389), 2018-06-19
Supplement: supp [file elife-34389-supp-v1.zip]

**A***Zmynd10*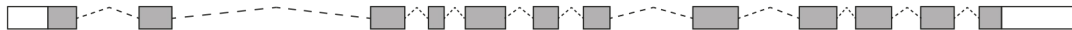

670 GAGCTGCAAAAGCAGGCGGAGATGATGGAAATTTGAGATATCCCTGAAAGCCCTCTCGGTGCTTCGCTACATCACAGACTGCGTGGATAG 758

guide 1 guide 2 guide 3

**B**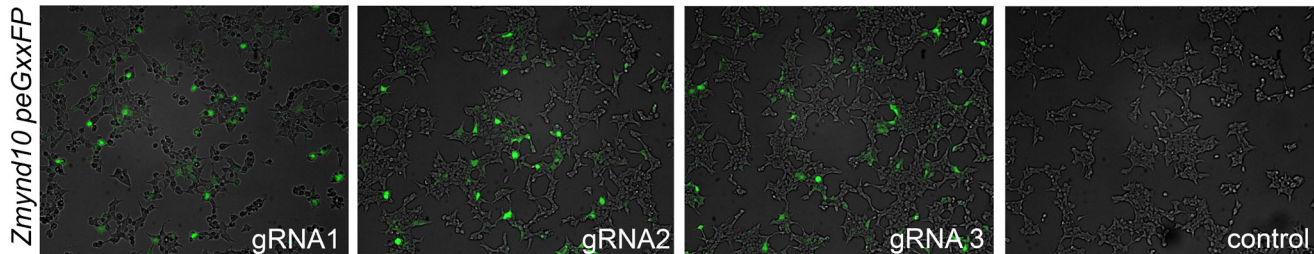**C**

| <i>Zmynd10</i><br>gRNA | No.<br>injections | No.<br>injected | No. 2<br>cell | No.<br>born | No.<br>weaning | Cas9+ | Edited | Mutation type                                                          | GLT? |
|------------------------|-------------------|-----------------|---------------|-------------|----------------|-------|--------|------------------------------------------------------------------------|------|
| 1                      | 1                 | 82              | 52            | 6           | 6              | 0/6   | 4/6    | Compound deletions and insertions: +1bp, -3bp, -6bp, -7bp, -8bp, -23bp | Yes  |
| 2                      | 2                 | 177             | 112           | 6           | 6              | 1/6   | 1/6    | Compound deletions: -19bp, -23bp                                       | Yes  |
|                        |                   | 173             | 114           | 30          | 28             | 1/28  | 6/28   | Compound deletions: -2bp, -3bp, -4bp, -5bp                             | Yes  |
| 3                      | 1                 | 179             | 138           | 29          | 27             | 0/27  | 11/27  | Compound deletion and insertions: +1bp, -1bp, -3bp, -9bp, -11bp, -28bp | Yes  |
