# Supplementary material for: ZMYND10 functions in a chaperone relay during axonemal dynein assembly
Source: eLife journal article supplement (doi:10.7554/elife.34389), 2018-06-19
Supplement: supp [file elife-34389-supp-v1.zip]

| Gene (mouse)   | Forward (5'-3')                                                                                                                                                                 | Reverse (5'-3')                                                                                                                                        | Usage description                                                                                                                                                                                                                                             |
|----------------|---------------------------------------------------------------------------------------------------------------------------------------------------------------------------------|--------------------------------------------------------------------------------------------------------------------------------------------------------|---------------------------------------------------------------------------------------------------------------------------------------------------------------------------------------------------------------------------------------------------------------|
| <i>Zmynd10</i> | CTGATTGCGGTGGAGATGTG<br>GCATTTTGAGAGTGCCGAT<br>TATTGCTGCAGGGAGTGCA                                                                                                              | CTTCTCAGGCTCTCATGCT<br>TGCTCAGGGAAAGGCTATCC<br>AGAGGCTGAATACGTGCTGA                                                                                    | LEFT_PRIMER 223 RIGHT_PRIMER 123<br>LEFT_PRIMER 711 RIGHT_PRIMER 613<br>LEFT_PRIMER 1237 RIGHT_PRIMER 1090                                                                                                                                                    |
| <i>Zmynd10</i> | ACTCAAGCGCTTCAAC<br>CATATACATGGTGGTAC<br>ATGGAATTTGAGATATCCCT<br>ATGGGCAAGTATGGATCGCCCT<br>TGGAGAGAGAGAACAAAGGGAAAT<br>AGTCAAGCACTGGGAGAAGCAC                                   | CAAGCCCCAGAATACCTT<br>AGCTGCAAAAGCAGGCGGA<br>AGCAAAAGCTGAATAAACTG<br>AACAGATCCCAGAAATCTGGGAT<br>TGGTATTGCTGCAGGGAGTGT<br>TTGGGGTCGGGGGAGAAGA           | <i>Zmynd10</i> cDNA RT-PCR (Exons 1-3)<br><i>Zmynd10</i> cDNA RT-PCR (Exons 3/4-6)<br><i>Zmynd10</i> cDNA RT-PCR (Exons 6-8)<br><i>Zmynd10</i> cDNA RT-PCR (Exons 8-9)<br><i>Zmynd10</i> cDNA RT-PCR (Exons 10-12)<br><i>Zmynd10</i> cDNA RT-PCR (Exon12-UTR) |
| <i>Zmynd10</i> | TCAAGTCAAGCACGCGGAGAAGCACGG<br>AGGTGGGCTGAATGCTACAGGCTGG<br>GGACTTTCCAAAATGTCG<br>CCTAAGAAGGACCTAGTGTTAG<br>TCCCTCGTTTCCATGGCGG<br>CATGGGAAGATCCCAACGCT<br>TCTCGGTGCTTCGCTACATC | TCCGTGCTTCTCCGCGTGCTTGACTTG<br>TCCAGCCTGTAGCATTAGCCCACC<br>GGTAGGTGCCGAAGTGGTAG<br>CGGGCCACTAGCAGTATCAG<br>AGATTGGGCAACTGGTCGAG<br>TGCTTTCCGTGCTTCTCCC | Mutagenesis W432A<br>Mutagenesis T379C<br>Seq pCMV6-AC-tGFP<br>Sequence Validation ORF <i>Zmynd10</i><br>Sequence Validation ORF <i>Zmynd10</i><br>Sequence Validation ORF <i>Zmynd10</i><br>Sequence Validation ORF <i>Zmynd10</i>                           |
