# Supplementary material for: ZMYND10 functions in a chaperone relay during axonemal dynein assembly
Source: eLife. 2018 Jun 19;7:e34389. doi: 10.7554/eLife.34389 (PMC6044906; doi:10.7554/eLife.34389)
Supplement: Supplementary file 1. — Label free quantitative (LFQ) proteomics were performed on whole testes extracts to compare differential protein expression profiles between Zmynd10-/-mutants and age matched (P25) wild type littermate controls. LFQ intensities from three sets of biological replicates were averaged per genotype and ratios of enrichment or depletion in mutant versus wild type were calculated. Significance values were calculated using a Student's paired 2-tailed t-test. For ease of interpretation, the proteins were grouped into their respective complexes (i.e. Inner Dynein Arm Heavy Chains, Outer Dynein Arm Heavy Chains etc.) [file elife-34389-supp1.xlsx]

## Sheet: Table S1
Supplementary File 1. Label-free quantitative global proteomics of P25 testes from Zmynd10+/+ and Zmynd10-/- mice.
LFQ raw reads								LFQ adjusted reads								Average Reads			Ratio MUT/WT	p-value		IDs
WT1	WT2	WT3		MUT1	MUT2	MUT3		WT1	WT2	WT3		MUT1	MUT2	MUT3		Average WT	Average MUT		ratio	p-value student's ttest		Protein names	Gene names	Notes
INNER DYNEIN ARM HEAVY CHAINS
32283000	22854000	32608000		0	0	0		32581210	23152210	32906210		298210	298210	298210		2.95465e+07	298210		0.0100929	0.000793779		Dynein heavy chain 12, E9QPU2	Dnah12	IAD 3
232210000	86506000	140340000		17015000	29069000	25524000		232508210	86804210	140638210		17313210	29367210	25822210		1.53317e+08	2.41675e+07		0.157631	0.0389504		Dynein heavy chain 12, axonemal; F6QA95	Dnah12	IDA3
1931900000	1532700000	1611900000		513560000	507130000	503250000		1932198210	1532998210	1612198210		513858210	507428210	503548210		1.69246e+09	508278210		0.300318	0.000631941		Dynein heavy chain 12, axonemal; Q3V0Q1	Dnah12	IAD 3
90030000	65373000	64997000		0	24065000	0		90328210	65671210	65295210		298210	24363210	298210		7.37649e+07	8.31988e+06		0.112789	0.0047541		Dynein heavy chain 3, axonemal;Q8BW94	Dnah3	IAD3
1958200000	1864000000	1592100000		835740000	804530000	880020000		1958498210	1864298210	1592398210		836038210	804828210	880318210		1.80506e+09	8.40395e+08		0.465576	0.000995986		Dynein heavy chain 7c, axonemal; A0A087WR13	Dnah7c	IAD 3
76695000	127490000	66509000		24569000	9233600	15474000		76993210	127788210	66807210		24867210	9531810	15772210		9.05295e+07	1.67237e+07		0.184732	0.0189619		Dynein heavy chain 7b, axonemal;L7N1Y0	Dnah7b	IDA
280080000	256080000	269320000		95017000	70925000	106130000		280378210	256378210	269618210		95315210	71223210	106428210		2.68792e+08	9.09889e+07		0.338511	0.000141651		Dynein heavy chain 1, axonemal; E9Q8T7	Dnah1	IAD 4	PCD
294900000	246410000	194210000		95116000	81072000	129790000		295198210	246708210	194508210		95414210	81370210	130088210		2.45472e+08	1.02291e+08		0.416712	0.0116146		Dynein heavy chain 6, axonemal;E9Q0B6 ;E9Q3H7	Dnah6	IAD 5
291820000	315270000	203000000		178730000	0	182830000		292118210	315568210	203298210		179028210	298210	183128210		270328210	120818210		0.446932	0.0971503		Dynein heavy chain 10, axonemal; F7ABZ6; D3YYQ8	Dnah10	IDA 1α
1228800000	833110000	921250000		642610000	690180000	505460000		1229098210	833408210	921548210		642908210	690478210	505758210		9.94685e+08	613048210		0.616324	0.0446105		Dynein heavy chain 2, axonemal; D3Z667; P0C6F1	Dnah2	IAD 1β
OUTER DYNEIN ARM HEAVY CHAINS
2502100000	1781800000	1886400000		558230000	547190000	723650000		2502398210	1782098210	1886698210		558528210	547488210	723948210		2.05706e+09	609988210		0.296533	0.00335768		Dynein heavy chain 17, axonemal; E9Q7P0;K3W4R0;Q69Z23	Dnah17	ODA HCβ
7622200000	8403600000	5955000000		3637500000	5498600000	8137200000		7622498210	8403898210	5955298210		3637798210	5498898210	8137498210		7.32723e+09	5.75806e+09		0.785845	0.352212		Dynein heavy chain 8, axonemal; Q91XQ0	Dnah8	OADα
INNER DYNEIN ARM INTERMEDIATE CHAINS
61425000	42436000	78156000		0	80891000	45345000		61723210	42734210	78454210		298210	81189210	45643210		6.09705e+07	4.23769e+07		0.695039	0.50758		WD repeat-containing protein 78	Wdr78		IAD IC: f/l1
143460000	155490000	162010000		138130000	79659000	133620000		143758210	155788210	162308210		138428210	79957210	133918210		1.53952e+08	1.17435e+08		0.762802	0.135219			Wdr63		IAD IC IC140
INNER DYNEIN ARM LIGHT CHAINS
1315700000	1045700000	1138700000		492570000	542040000	587650000		1315998210	1045998210	1138998210		492868210	542338210	587948210		1166998210	5.41052e+08		0.463627	0.00171815		Axonemal dynein light intermediate polypeptide 1	Dnali1	IDA	pcd
369590000	202950000	312260000		237930000	353430000	259890000		369888210	203248210	312558210		238228210	353728210	260188210		2.95232e+08	284048210		0.96212	0.862023		Axonemal dynein light chain domain-containing protein 1	Axdnd1
319300000	309140000	261510000		290520000	265060000	331680000		319598210	309438210	261808210		290818210	265358210	331978210		296948210	2.96052e+08		0.99698	0.974479		Dynein light chain roadblock-type 2	Dynlrb2
143290000	120330000	128790000		111190000	141250000	153700000		143588210	120628210	129088210		111488210	141548210	153998210		1.31102e+08	135678210		1.03491	0.764765		Dynein light chain 1, axonemal	Dnal1	PCD
531050000	790360000	434760000		450110000	588430000	865160000		531348210	790658210	435058210		450408210	588728210	865458210		585688210	6.34865e+08		1.08396	0.776267		Centrin-1	Cetn1	centriole
4165800000	4766700000	4190200000		3826800000	4900100000	5486400000		4166098210	4766998210	4190498210		3827098210	4900398210	5486698210		4.37453e+09	4.73806e+09		1.0831	0.526077		Dynein light chain Tctex-type 1	Dynlt1	Dynein light chain: Tctex1 f/l1
775880000	910470000	748250000		822390000	939670000	970840000		776178210	910768210	748548210		822688210	939968210	971138210		8.11832e+08	9.11265e+08		1.12248	0.214595		Tctex1 domain-containing protein 3	Tcte3	OAD light chain
1191400000	1255800000	771200000		854260000	1481400000	1336500000		1191698210	1256098210	771498210		854558210	1481698210	1336798210		1073098210	1.22435e+09		1.14095	0.567295		Tctex1 domain-containing protein 2	Tctex1d2	Light chain
553040000	648890000	509150000		572830000	895720000	759900000		553338210	649188210	509448210		573128210	896018210	760198210		570658210	7.43115e+08		1.30221	0.167085		Dynein light chain roadblock-type 1	Dynlrb1
DYNEIN ASSEMBLY FACTORS
36179000	25079000	51451000		0	0	14926000		36477210	25377210	51749210		298210	298210	15224210		3.78679e+07	5.27354e+06		0.139262	0.0233024		Protein tilB homolog	Lrrc6	DNAAF	PCD
5710100000	5335000000	5066700000		4855600000	5139900000	5995100000		5710398210	5335298210	5066998210		4855898210	5140198210	5995398210		5370898210	5330498210		0.992478	0.922474		Dynein assembly factor 5, axonemal	Dnaaf5
5498700000	6173100000	5324000000		5049300000	6437700000	6091000000		5498998210	6173398210	5324298210		5049598210	6437998210	6091298210		5.66556e+09	5.85963e+09		1.03425	0.712827		Dynein assembly factor 1, axonemal	Dnaaf1	PCD
1002600000	880290000	902350000		861500000	1184400000	959700000		1002898210	880588210	902648210		861798210	1184698210	959998210		9.28712e+08	1.00216e+09		1.07909	0.514044		Armadillo repeat-containing protein 4	Armc4	PCD
956470000	858190000	781050000		806850000	978920000	1018000000		956768210	858488210	781348210		807148210	979218210	1018298210		8.65535e+08	934888210		1.08013	0.447155		Sperm-associated antigen 1	Spag1	PCD: DNAAF
339020000	371250000	342440000		363290000	567190000	371450000		339318210	371548210	342738210		363588210	567488210	371748210		3.51202e+08	4.34275e+08		1.23654	0.285406		Dynein assembly factor 3, axonemal	Dnaaf3	pcd
654220000	736840000	634960000		728270000	815390000	837740000		654518210	737138210	635258210		728568210	815688210	838038210		675638210	794098210		1.17533	0.0606733		PIH1 domain-containing protein 1	Pih1d1	PIH paralogue
569780000	359140000	576230000		632710000	649220000	507800000		570078210	359438210	576528210		633008210	649518210	508098210		5.02015e+08	5.96875e+08		1.18896	0.32259		Protein DPCD: delected in PCD	Dpcd	IAD?
134520000	152650000	141180000		155940000	184010000	192670000		134818210	152948210	141478210		156238210	184308210	192968210		1.43082e+08	177838210		1.24292	0.0473848		Protein PIH1D3	Pih1d3;E230019M04Rik
3084200000	3575900000	2704700000		3494200000	4067300000	4196600000		3084498210	3576198210	2704998210		3494498210	4067598210	4196898210		3121898210	3.91966e+09		1.25554	0.0740866		Protein kintoun	Dnaaf2
956110000	1008900000	901600000		1439600000	1188500000	1430700000		956408210	1009198210	901898210		1439898210	1188798210	1430998210		9.55835e+08	1.35323e+09		1.41576	0.0106484		UPF0769 protein C21orf59 homolog		PCD: Dynein assembly factor
233430000	347360000	270210000		383820000	540250000	518740000		233728210	347658210	270508210		384118210	540548210	519038210		2.83965e+08	4.81235e+08		1.6947	0.0292861		Dyslexia susceptibility 1 candidate gene 1 protein homolog	Dyx1c1;Dyx1c1Ccpg1	pcd
OUTER DYNEIN ARM INTERMEDIATE CHAINS
80970000	54386000	43608000		23937000	42173000	41894000		81268210	54684210	43906210		24235210	42471210	42192210		5.99529e+07	3.62995e+07		0.605468	0.134527		Dynein intermediate chain 2, axonemal	Dnaic2;Dnai2	pcd	oad ic
260580000	219380000	250610000		185160000	215170000	108880000		260878210	219678210	250908210		185458210	215468210	109178210		2.43822e+08	1.70035e+08		0.697374	0.0956826		Dynein intermediate chain 1, axonemal	Dnaic1;Dnai1	pcd	OAD IC
RADIAL SPOKE COMPLEX
19103000000	17367000000	14995000000		13144000000	12982000000	16080000000		19103298210	17367298210	14995298210		13144298210	12982298210	16080298210		17155298210	1.4069e+10		0.820094	0.118878		Radial spoke head 1 homolog	Rsph1	PCD
1209900000	1011400000	985560000		950210000	1034700000	978950000		1210198210	1011698210	985858210		950508210	1034998210	979248210		1.06925e+09	9.88252e+08		0.924246	0.341379		Radial spoke head protein 3 homolog B;Radial spoke head protein 3 homolog A	Rsph3b;Rsph3a	pcd
515130000	509570000	476810000		458210000	604070000	591530000		515428210	509868210	477108210		458508210	604368210	591828210		5.00802e+08	551568210		1.10137	0.351443		Radial spoke head protein 9 homolog	Rsph9	pcd
DYNEIN ATTACHMENT FACTOR
184300000	165990000	204340000		102870000	147460000	216460000		184598210	166288210	204638210		103168210	147758210	216758210		1.85175e+08	1.55895e+08		0.841879	0.44808		Coiled-coil domain-containing protein 103	Ccdc103	PCD
DYNEIN REGULATOR COMPLEX
21682000	28033000	11321000		20864000	1779400	28759000		21980210	28331210	11619210		21162210	2077610	29057210		2.06435e+07	1.74323e+07		0.844445	0.74915		Growth arrest-specific protein 8	Gas8	DRC component
31407000	24981000	29463000		17060000	28577000	31400000		31705210	25279210	29761210		17358210	28875210	31698210		28915210	25977210		0.898393	0.572092		Dynein regulatory complex subunit 7	Drc7
1198000000	956270000	737500000		830200000	994880000	1095400000		1198298210	956568210	737798210		830498210	995178210	1095698210		9.64222e+08	9.73792e+08		1.00993	0.953377		Dynein regulatory complex protein 1	Drc1	pcd
849700000	771550000	799970000		714090000	979490000	1034700000		849998210	771848210	800268210		714388210	979788210	1034998210		8.07372e+08	9.09725e+08		1.12677	0.370566		Coiled-coil domain-containing protein 65	Ccdc65	PCD:DRC2
1569500000	1521400000	1536600000		1525200000	2004000000	1744400000		1569798210	1521698210	1536898210		1525498210	2004298210	1744698210		1542798210	1.75816e+09		1.13959	0.196491		Coiled-coil domain-containing protein 39	Ccdc39
1490600000	1271700000	1286100000		1304100000	1509000000	1369400000		1490898210	1271998210	1286398210		1304398210	1509298210	1369698210		1.34976e+09	1.39446e+09		1.03312	0.655874		Coiled-coil domain-containing protein 40	Ccdc40
INTRAFLAGELLAR TRANSPORT
1273100000	1245000000	1181200000		1108600000	1357800000	1257300000		1273398210	1245298210	1181498210		1108898210	1358098210	1257598210		1233398210	1.24153e+09		1.00659	0.921291		Intraflagellar transport protein 88 homolog	Ift88
324550000	425160000	302770000		395690000	280170000	328260000		324848210	425458210	303068210		395988210	280468210	328558210		3.51125e+08	3.35005e+08		0.95409	0.765239		Intraflagellar transport protein 46 homolog	Ift46	oda transport
1510300000	1515200000	1561800000		1241500000	1605100000	1562200000		1510598210	1515498210	1562098210		1241798210	1605398210	1562498210		1529398210	1469898210		0.961096	0.634711		Intraflagellar transport protein 74 homolog	Ift74
MEIOTIC/GERM CELL DEVELOPMENT MARKERS
289050000	401130000	253390000		283650000	242830000	273600000		289348210	401428210	253688210		283948210	243128210	273898210		3.14822e+08	2.66992e+08		0.848073	0.358767		Interferon-induced transmembrane protein 3	Ifitm3	Fragellis: germ cell marker
41707000000	40993000000	34405000000		34666000000	41731000000	46007000000		41707298210	40993298210	34405298210		34666298210	41731298210	46007298210		39035298210	4.08016e+10		1.04525	0.684655		Probable ATP-dependent RNA helicase DDX4	Ddx4	Vasa: pre-meiotic marker
14224000000	16397000000	13997000000		13144000000	13996000000	16726000000		14224298210	16397298210	13997298210		13144298210	13996298210	16726298210		1.4873e+10	14622298210		0.983146	0.859033		Piwi-like protein 2	Piwil2	Pre-meiosis
1216900000	1669200000	1539200000		1791700000	1589300000	1798200000		1217198210	1669498210	1539498210		1791998210	1589598210	1798498210		1475398210	1726698210		1.17033	0.171226		Deleted in azoospermia-like	Dazl	pre-meiotic marker
17758000	31479000	32180000		45643000	17182000	30191000		18056210	31777210	32478210		45941210	17480210	30489210		27437210	3.13035e+07		1.14092	0.704029		Stimulated by retinoic acid gene 8 protein	Stra8	Meiosis marker
2498000000	2537900000	2370800000		3084300000	2793500000	3346700000		2498298210	2538198210	2371098210		3084598210	2793798210	3346998210		2469198210	3.07513e+09		1.2454	0.0224159		Synaptonemal complex protein 3	Sycp3	Meiosis marker
41291000	40279000	48096000		49804000	31220000	38416000		41589210	40577210	48394210		50102210	31518210	38714210		43520210	4.01115e+07		0.921676	0.59684		Meiotic recombination protein DMC1/LIM15 homolog	Dmc1	Meiosis marker
DIFFERENTIATION SPERMATID MARKERS
0	0	82942000		107810000	196440000	0		298210	298210	83240210		108108210	196738210	298210		2.79455e+07	1.01715e+08		3.63975	0.307744		Acrosomal protein SP-10	Acrv1	Spermatid marker: acrosome
407500000	362040000	380520000		382110000	587780000	307100000		407798210	362338210	380818210		382408210	588078210	307398210		3.83652e+08	4.25962e+08		1.11028	0.644517		Zona pellucida sperm-binding protein 3 receptor	Zp3r	Spermatid marker: acrosome
103260000	92597000	119270000		140160000	164450000	98404000		103558210	92895210	119568210		140458210	164748210	98702210		1.05341e+08	134636210		1.2781	0.231517		Izumo sperm-egg fusion protein 1	Izumo1	Spermatid marker: acrosome
352640000	295430000	289490000		300170000	329330000	351050000		352938210	295728210	289788210		300468210	329628210	351348210		312818210	327148210		1.04581	0.596518		Tyrosyl-DNA phosphodiesterase 1	Tdp1	Elongating spermatid marker: chromatin remodeling
1458900000	1734300000	1726600000		1713400000	1649000000	1868700000		1459198210	1734598210	1726898210		1713698210	1649298210	1868998210		1.64023e+09	1743998210		1.06326	0.405025		DNA topoisomerase 2-beta	Top2b	Elongating spermatid marker: chromatin remodelling
CELL DEATH MARKERS
39051000	35877000	39974000		32578000	17495000	33148000		39349210	36175210	40272210		32876210	17793210	33446210		3.85989e+07	2.80385e+07		0.726408	0.115775		Caspase-3;Caspase-3 subunit p17;Caspase-3 subunit p12	Casp3	Programmed cell death
48269000	41058000	30846000		0	0	46053000		48567210	41356210	31144210		298210	298210	46351210		4.03559e+07	15649210		0.38778	0.201063		Caspase;Caspase-9;Caspase-9 subunit p35;Caspase-9 subunit p10	Casp9	Programmed cell death
13644000000	19653000000	17530000000		18640000000	15846000000	14232000000		13644298210	19653298210	17530298210		18640298210	15846298210	14232298210		1.69426e+10	1.62396e+10		0.958507	0.763263		Annexin A5	Anxa5	Programmed cell death

## Sheet: Full set
LFQ raw reads								LFQ adjusted reads								Average Reads			Ratio MUT/WT	p-value				IDs
WT1	WT2	WT3		MUT1	MUT2	MUT3		WT1	WT2	WT3		MUT1	MUT2	MUT3		Average WT	Average MUT		ratio	p-value student's ttest				Protein names	Gene names	Notes
0	0	1659100000		0	0	0		298210	298210	1659398210		298210	298210	298210		5.53332e+08	298210		0.000538935	0.373901				Keratin, type II cuticular Hb5	Krt85
455620000	0	0		0	0	0		455918210	298210	298210		298210	298210	298210		1.52172e+08	298210		0.0019597	0.373901				Cysteine-rich secretory protein 1;Cysteine-rich secretory protein 3	Crisp1;Crisp3
0	0	421100000		0	0	0		298210	298210	421398210		298210	298210	298210		1.40665e+08	298210		0.00212	0.373901				Ninein-like protein	Ninl
3443700000	3417200000	3194300000		24078000	0	0		3443998210	3417498210	3194598210		24376210	298210	298210		3.35203e+09	8324210		0.00248333	1.90957e-06				Zinc finger MYND domain-containing protein 10	Zmynd10
0	0	355230000		0	0	0		298210	298210	355528210		298210	298210	298210		118708210	298210		0.00251213	0.373901					Gm11555;Krtap4-2;Krtap4-7;Gm11563;Krtap4-1
97248000	106350000	90705000		0	0	0		97546210	106648210	91003210		298210	298210	298210		98399210	298210		0.00303061	2.70485e-05					Usp9x
214040000	10132000	0		0	0	0		214338210	10430210	298210		298210	298210	298210		75022210	298210		0.00397496	0.344178				CUB and zona pellucida-like domain-containing protein 1	Cuzd1
65458000	81707000	55559000		0	0	0		65756210	82005210	55857210		298210	298210	298210		6.78729e+07	298210		0.00439365	0.000894025				Proline-rich protein 15	Prr15
201570000	0	0		0	0	0		201868210	298210	298210		298210	298210	298210		67488210	298210		0.0044187	0.373901				E3 ubiquitin-protein ligase NEDD4-like	Nedd4l
190980000	0	5908900		0	0	0		191278210	298210	6207110		298210	298210	298210		6.59278e+07	298210		0.00452328	0.354296
169590000	0	7012300		0	0	0		169888210	298210	7310510		298210	298210	298210		5.91656e+07	298210		0.00504026	0.34785					Psma3
130990000	0	0		0	0	0		131288210	298210	298210		298210	298210	298210		4.39615e+07	298210		0.00678343	0.373901					Tpm3
59344000	0	71143000		0	0	0		59642210	298210	71441210		298210	298210	298210		4.37939e+07	298210		0.0068094	0.119359					Wbscr27
67239000	58643000	0		0	0	0		67537210	58941210	298210		298210	298210	298210		4.22589e+07	298210		0.00705674	0.117968				Small integral membrane protein 4	Smim4
121630000	0	0		0	0	0		121928210	298210	298210		298210	298210	298210		4.08415e+07	298210		0.00730163	0.373901				Myosin light chain kinase, smooth muscle;Myosin light chain kinase, smooth muscle, deglutamylated form	Mylk
53939000	26457000	39243000		0	0	0		54237210	26755210	39541210		298210	298210	298210		4.01779e+07	298210		0.00742224	0.00737087				Small integral membrane protein 11	Smim11
0	69594000	47796000		0	0	0		298210	69892210	48094210		298210	298210	298210		39428210	298210		0.00756337	0.129647					Osgep
69560000	46727000	0		0	0	0		69858210	47025210	298210		298210	298210	298210		3.90605e+07	298210		0.00763456	0.13122					Fpgt
0	0	2365600000		4501300	9011000	3764200		298210	298210	2365898210		4799510	9309210	4062410		7.88832e+08	6.05704e+06		0.0076785	0.377049
0	55322000	58296000		0	0	0		298210	55620210	58594210		298210	298210	298210		3.81709e+07	298210		0.0078125	0.116389				Zinc finger protein 428	Zfp428;Znf428
0	60394000	50834000		0	0	0		298210	60692210	51132210		298210	298210	298210		37374210	298210		0.00797903	0.119047				Small integral membrane protein 1	Smim1
84275000	25652000	0		0	0	0		84573210	25950210	298210		298210	298210	298210		3.69405e+07	298210		0.0080727	0.215721				Factor VIII intron 22 protein	F8a;F8a1
31998000	28067000	33775000		0	0	0		32296210	28365210	34073210		298210	298210	298210		31578210	298210		0.00944354	4.97245e-05					Myo6
46152000	35833000	8839200		0	0	0		46450210	36131210	9137410		298210	298210	298210		3.05729e+07	298210		0.00975405	0.0529015				Cyclin-dependent kinases regulatory subunit;Cyclin-dependent kinases regulatory subunit 1	Cks1b;Cks1brt
42594000	45487000	0		0	0	0		42892210	45785210	298210		298210	298210	298210		2.96585e+07	298210		0.0100548	0.116545				Echinoderm microtubule-associated protein-like 3	Eml3
32283000	22854000	32608000		0	0	0		32581210	23152210	32906210		298210	298210	298210		2.95465e+07	298210		0.0100929	0.000793779					Dnah12	IAD 3
86949000	0	0		0	0	0		87247210	298210	298210		298210	298210	298210		29281210	298210		0.0101843	0.373901				Alpha-1-antitrypsin 1-3	Serpina1c
23215000	17096000	44378000		0	0	0		23513210	17394210	44676210		298210	298210	298210		2.85279e+07	298210		0.0104533	0.0268907				Cingulin	Cgn
43799000	0	35976000		0	0	0		44097210	298210	36274210		298210	298210	298210		2.68899e+07	298210		0.01109	0.119927				Polycystin-2	Pkd2
65477000	5478100	8198400		0	0	0		65775210	5776310	8496610		298210	298210	298210		26682710	298210		0.0111762	0.248715				Protein RMD5 homolog B	Rmnd5b
0	0	77935000		0	0	0		298210	298210	78233210		298210	298210	298210		2.62765e+07	298210		0.0113489	0.373901				B-cell lymphoma/leukemia 11A	Bcl11a
31864000	32006000	12189000		0	0	0		32162210	32304210	12487210		298210	298210	298210		25651210	298210		0.0116256	0.0182746				Leukocyte receptor cluster member 1 homolog	Leng1
37110000	0	28061000		0	0	0		37408210	298210	28359210		298210	298210	298210		2.20219e+07	298210		0.0135415	0.123728					Dlec1
60400000	0	0		0	0	0		60698210	298210	298210		298210	298210	298210		2.04315e+07	298210		0.0145956	0.373901					1700049E17Rik2
25813000	30933000	0		0	0	0		26111210	31231210	298210		298210	298210	298210		1.92135e+07	298210		0.0155208	0.119345				Collagen alpha-1(XXIV) chain	Col24a1
22889000	32618000	0		0	0	0		23187210	32916210	298210		298210	298210	298210		1.88005e+07	298210		0.0158618	0.12819				UPF0235 protein C15orf40 homolog
16097000	16635000	19102000		0	0	0		16395210	16933210	19400210		298210	298210	298210		17576210	298210		0.0169667	4.83874e-05				Protein FAM210A	Fam210a
26619000	0	24419000		0	0	0		26917210	298210	24717210		298210	298210	298210		1.73109e+07	298210		0.0172267	0.116855				Alpha-1,3-mannosyl-glycoprotein 2-beta-N-acetylglucosaminyltransferase	Mgat1
49757000	0	0		0	0	0		50055210	298210	298210		298210	298210	298210		1.68839e+07	298210		0.0176624	0.373901				UPF0669 protein C6orf120 homolog
20451000	10804000	16797000		0	0	0		20749210	11102210	17095210		298210	298210	298210		1.63155e+07	298210		0.0182777	0.00469351				Ca(2+)-independent N-acyltransferase;HRAS-like suppressor 3	Hrasls5;Pla2g16
23228000	18819000	5194900		0	0	0		23526210	19117210	5493110		298210	298210	298210		16045510	298210		0.0185853	0.0440575				Zinc finger and SCAN domain-containing protein 21	Zscan21
0	17339000	29323000		0	0	0		298210	17637210	29621210		298210	298210	298210		15852210	298210		0.0188119	0.141661				BTB/POZ domain-containing protein 10	Btbd10
0	21423000	22607000		0	0	0		298210	21721210	22905210		298210	298210	298210		1.49749e+07	298210		0.019914	0.116404				Uncharacterized protein KIAA0195	Kiaa0195
0	22455000	19310000		0	0	0		298210	22753210	19608210		298210	298210	298210		1.42199e+07	298210		0.0209713	0.118367				Nuclear transcription factor Y subunit alpha	Nfya
0	41161000	0		0	0	0		298210	41459210	298210		298210	298210	298210		1.40185e+07	298210		0.0212725	0.373901				Sialoadhesin	Siglec1
18893000	20408000	0		0	0	0		19191210	20706210	298210		298210	298210	298210		1.33985e+07	298210		0.0222569	0.116707				MOB kinase activator 2	Mob2
0	8731000	30372000		0	0	0		298210	9029210	30670210		298210	298210	298210		1.33325e+07	298210		0.0223671	0.222287				Sperm-specific antigen 2 homolog	Ssfa2
0	0	37251000		0	0	0		298210	298210	37549210		298210	298210	298210		12715210	298210		0.023453	0.373901					Aimp2
35618000	0	0		0	0	0		35916210	298210	298210		298210	298210	298210		1.21709e+07	298210		0.0245019	0.373901				Ig gamma-1 chain C region secreted form;Ig gamma-1 chain C region, membrane-bound form	Ighg1
35448000	0	0		0	0	0		35746210	298210	298210		298210	298210	298210		12114210	298210		0.0246165	0.373901					Ndufs2
0	19113000	16095000		0	0	0		298210	19411210	16393210		298210	298210	298210		12034210	298210		0.0247802	0.119031				Transmembrane channel-like protein;Transmembrane channel-like protein 6	Tmc6
3431700	26963000	4518300		0	0	0		3729910	27261210	4816510		298210	298210	298210		1.19359e+07	298210		0.0249843	0.203749					4933409G03Rik
0	34904000	0		0	0	0		298210	35202210	298210		298210	298210	298210		1.19329e+07	298210		0.0249906	0.373901					Zfp947
0	33034000	0		0	0	0		298210	33332210	298210		298210	298210	298210		1.13095e+07	298210		0.026368	0.373901				HIG1 domain family member 2A	Higd2a
32833000	0	0		0	0	0		33131210	298210	298210		298210	298210	298210		1.12425e+07	298210		0.0265251	0.373901					Znf512b
104470000	427000000	29366000		0	14294000	0		104768210	427298210	29664210		298210	14592210	298210		1.87244e+08	5.06288e+06		0.027039	0.209847				Uncharacterized protein C10orf35 homolog	2010107G23Rik
0	0	4961200000		136610000	0	0		298210	298210	4961498210		136908210	298210	298210		1.65403e+09	4.58349e+07		0.027711	0.386049				Keratin, type I cuticular Ha3-II	Krt33b
26937000	0	0		0	0	0		27235210	298210	298210		298210	298210	298210		9277210	298210		0.0321444	0.373901				GRAM domain-containing protein 1A	Gramd1a
10880000	5465000	8977000		0	0	0		11178210	5763210	9275210		298210	298210	298210		8.73888e+06	298210		0.0341245	0.0059977				FERM and PDZ domain-containing protein 1	Frmpd1
25136000	0	0		0	0	0		25434210	298210	298210		298210	298210	298210		8.67688e+06	298210		0.0343684	0.373901				Retinoblastoma-associated protein	Rb1
0	24970000	0		0	0	0		298210	25268210	298210		298210	298210	298210		8.62154e+06	298210		0.0345889	0.373901				Isochorismatase domain-containing protein 2B, mitochondrial	Isoc2b
24950000	0	0		0	0	0		25248210	298210	298210		298210	298210	298210		8.61488e+06	298210		0.0346157	0.373901				Raftlin-2	Rftn2
22751000	0	0		0	0	0		23049210	298210	298210		298210	298210	298210		7.88188e+06	298210		0.0378349	0.373901				Peroxisomal bifunctional enzyme;Enoyl-CoA hydratase/3,2-trans-enoyl-CoA isomerase;3-hydroxyacyl-CoA dehydrogenase	Ehhadh
20963000	0	0		0	0	0		21261210	298210	298210		298210	298210	298210		7.28588e+06	298210		0.0409299	0.373901				Trinucleotide repeat-containing gene 6C protein	Tnrc6c
18621000	0	0		0	0	0		18919210	298210	298210		298210	298210	298210		6505210	298210		0.0458417	0.373901				Syntaxin-2	Stx2
0	0	17641000		0	0	0		298210	298210	17939210		298210	298210	298210		6.17854e+06	298210		0.0482654	0.373901				Protein LAP2	Erbb2ip
17548000	0	0		0	0	0		17846210	298210	298210		298210	298210	298210		6.14754e+06	298210		0.0485088	0.373901				Ninjurin-1	Ninj1
0	13852000	3249200		0	0	0		298210	14150210	3547410		298210	298210	298210		5998610	298210		0.0497132	0.244574				Inositol-trisphosphate 3-kinase C	Itpkc
10362000	168430000	0		0	8123400	0		10660210	168728210	298210		298210	8421610	298210		5.98955e+07	3006010		0.0501875	0.356004				Cytoplasmic tRNA 2-thiolation protein 1	Ctu1
16871000	0	0		0	0	0		17169210	298210	298210		298210	298210	298210		5.92188e+06	298210		0.0503573	0.373901				Sperm-associated antigen 5	Spag5
16605000	0	0		0	0	0		16903210	298210	298210		298210	298210	298210		5833210	298210		0.0511228	0.373901				Radial spoke head 14 homolog	Rsph14
8535200	0	7720600		0	0	0		8833410	298210	8018810		298210	298210	298210		5716810	298210		0.0521637	0.117114				Tyrosine-protein phosphatase non-receptor type 6	Ptpn6
0	16073000	0		0	0	0		298210	16371210	298210		298210	298210	298210		5.65588e+06	298210		0.0527257	0.373901				Uncharacterized protein CXorf38 homolog
0	0	15300000		0	0	0		298210	298210	15598210		298210	298210	298210		5398210	298210		0.0552424	0.373901				PHD finger protein 14	Phf14
0	0	14199000		0	0	0		298210	298210	14497210		298210	298210	298210		5031210	298210		0.059272	0.373901					Ppil6
2324100	0	11690000		0	0	0		2622310	298210	11988210		298210	298210	298210		4.96958e+06	298210		0.0600071	0.261145				Lactosylceramide alpha-2,3-sialyltransferase	St3gal5
0	13888000	0		0	0	0		298210	14186210	298210		298210	298210	298210		4.92754e+06	298210		0.060519	0.373901				Activating molecule in BECN1-regulated autophagy protein 1	Ambra1
0	0	13607000		0	0	0		298210	298210	13905210		298210	298210	298210		4.83388e+06	298210		0.0616917	0.373901				DNA excision repair protein ERCC-8	Ercc8
0	0	847360000		0	0	52340000		298210	298210	847658210		298210	298210	52638210		2.82752e+08	1.77449e+07		0.0627578	0.40206				Keratin, type I cuticular Ha2	Krt32
18931000	0	48812000		3629500	0	0		19229210	298210	49110210		3927710	298210	298210		22879210	1.50804e+06		0.0659133	0.208323				15-hydroxyprostaglandin dehydrogenase [NAD(+)]	Hpgd
0	0	12632000		0	0	0		298210	298210	12930210		298210	298210	298210		4.50888e+06	298210		0.0661384	0.373901				Zinc finger BED domain-containing protein 3	Zbed3
17203000	0	10439000000		682300000	10339000	6995700		17501210	298210	10439298210		682598210	10637210	7293910		3485699210	2.3351e+08		0.0669908	0.40343
0	0	12083000		0	0	0		298210	298210	12381210		298210	298210	298210		4.32588e+06	298210		0.0689363	0.373901				Friend virus susceptibility protein 1	Fv1
913140000	1123600000	967280000		48055000	48600000	112240000		913438210	1123898210	967578210		48353210	48898210	112538210		1001638210	6.99299e+07		0.0698155	0.000151417				Carboxylesterase 1D	Ces1d
25039000	30080000	101360000		0	0	10517000		25337210	30378210	101658210		298210	298210	10815210		5.24579e+07	3.80388e+06		0.072513	0.122301				Insulin-like growth factor-binding protein complex acid labile subunit	Igfals
7537000	0	3734000		0	0	0		7835210	298210	4032210		298210	298210	298210		4055210	298210		0.0735375	0.159289				DCN1-like protein 2	Dcun1d2
11196000	0	0		0	0	0		11494210	298210	298210		298210	298210	298210		4030210	298210		0.0739937	0.373901				Tonsoku-like protein	Tonsl
0	0	10956000		0	0	0		298210	298210	11254210		298210	298210	298210		3950210	298210		0.0754922	0.373901				DENN domain-containing protein 4B	Dennd4b
5720200	4580000	0		0	0	0		6018410	4878210	298210		298210	298210	298210		3731610	298210		0.0799146	0.120968				Coiled-coil domain-containing protein 63	Ccdc63
0	10173000	0		0	0	0		298210	10471210	298210		298210	298210	298210		3689210	298210		0.080833	0.373901				Creatine kinase M-type	Ckm
107350000	41254000	3576000000		260440000	0	46601000		107648210	41552210	3576298210		260738210	298210	46899210		1.24183e+09	102645210		0.0826562	0.385408				Keratin, type I cuticular Ha5	Krt35
88950000	25832000	40248000		0	12571000	0		89248210	26130210	40546210		298210	12869210	298210		5.19749e+07	4.48854e+06		0.0863599	0.0720612				GC-rich sequence DNA-binding factor 2	Gcfc2
8638300	0	0		0	0	0		8936510	298210	298210		298210	298210	298210		3.17764e+06	298210		0.0938463	0.373901				Alpha-tubulin N-acetyltransferase 1	Atat1
9919700	269350000	244380000		48524000	0	0		10217910	269648210	244678210		48822210	298210	298210		174848110	1.64729e+07		0.0942125	0.133131				Protein O-glucosyltransferase 1	Poglut1
0	0	1111900000		0	108220000	0		298210	298210	1112198210		298210	108518210	298210		3.70932e+08	3.63715e+07		0.0980546	0.419751
21008000	28084000	14169000000		1378500000	0	21081000		21306210	28382210	14169298210		1378798210	298210	21379210		4739662210	466825210		0.0984934	0.418038
0	2066000	6019800		0	0	0		298210	2364210	6318010		298210	298210	298210		2.99348e+06	298210		0.09962	0.201666				CKLF-like MARVEL transmembrane domain-containing protein 2B	Cmtm2b
313480000	24714000	10917000		12141000	22709000	0		313778210	25012210	11215210		12439210	23007210	298210		1.16669e+08	1.19149e+07		0.102126	0.349033				Lymphoid enhancer-binding factor 1	Lef1
0	0	10475000000		1070100000	0	0		298210	298210	10475298210		1070398210	298210	298210		3.49196e+09	356998210		0.102234	0.422235
2651400	4994600	0		0	0	0		2949610	5292810	298210		298210	298210	298210		2.84688e+06	298210		0.10475	0.152049				Solute carrier family 12 member 6	Slc12a6
93098000	40938000	32432000		0	0	17574000		93396210	41236210	32730210		298210	298210	17872210		5.57875e+07	6156210		0.110351	0.066727				F-box/LRR-repeat protein 15	Fbxl15
3600200	0	3482800		0	0	0		3898410	298210	3781010		298210	298210	298210		2659210	298210		0.112142	0.116226				DNA mismatch repair protein Mlh1	Mlh1
90030000	65373000	64997000		0	24065000	0		90328210	65671210	65295210		298210	24363210	298210		7.37649e+07	8.31988e+06		0.112789	0.0047541				Dynein heavy chain 3, axonemal	Dnah3	IAD3
11219000	13756000	10160000		0	0	3246000		11517210	14054210	10458210		298210	298210	3544210		1.20099e+07	1380210		0.114923	0.00219764				Coxsackievirus and adenovirus receptor homolog	Cxadr
0	0	6584900		0	0	0		298210	298210	6883110		298210	298210	298210		2.49318e+06	298210		0.11961	0.373901				Nucleolar protein 7	Nol7
83209000	10950000	65573000000		7906600000	130810000	49300000		83507210	11248210	65573298210		7906898210	131108210	49598210		21889351210	2695868210		0.123159	0.432153
0	0	6306700		0	0	0		298210	298210	6604910		298210	298210	298210		2.40044e+06	298210		0.124231	0.373901				Adiponectin receptor protein 2	Adipor2
832950000	776040000	0		0	7819600	192250000		833248210	776338210	298210		298210	8117810	192548210		536628210	6.69881e+07		0.124831	0.163947				CASP8-associated protein 2	Casp8ap2
46295000	38240000	2401600000		266200000	27721000	27660000		46593210	38538210	2401898210		266498210	28019210	27958210		8.2901e+08	1.07492e+08		0.129663	0.412994
315600000	471730000	509970000		25219000	33736000	110820000		315898210	472028210	510268210		25517210	34034210	111118210		4.32732e+08	5.68899e+07		0.131467	0.00454153				Prion-like protein doppel	Prnd;Gm28045
58780000	0	0		0	0	7010100		59078210	298210	298210		298210	298210	7308310		1.98915e+07	2634910		0.132464	0.43119				Protein lin-28 homolog B	Lin28b
0	5694400	0		0	0	0		298210	5992610	298210		298210	298210	298210		2.19634e+06	298210		0.135776	0.373901				Protein FAM84A	Fam84a
36179000	25079000	51451000		0	0	14926000		36477210	25377210	51749210		298210	298210	15224210		3.78679e+07	5.27354e+06		0.139262	0.0233024				Protein tilB homolog	Lrrc6	DNAAF	PCD
0	15489000	631040		0	0	1505700		298210	15787210	929250		298210	298210	1803910		5.67156e+06	800110		0.141074	0.39239				TELO2-interacting protein 1 homolog	Tti1
19630000	41266000	64596000000		8946300000	269840000	56795000		19928210	41564210	64596298210		8946598210	270138210	57093210		2.15526e+10	3.09128e+09		0.143429	0.443228
798440000	32658000	45711000		30553000	60732000	45644000		798738210	32956210	46009210		30851210	61030210	45942210		2.92568e+08	45941210		0.157028	0.385299				Rab-3A-interacting protein	Rab3ip
232210000	86506000	140340000		17015000	29069000	25524000		232508210	86804210	140638210		17313210	29367210	25822210		1.53317e+08	2.41675e+07		0.157631	0.0389504					Dnah12	IDA3
18792000	85643000	55416000		13652000	10983000	0		19090210	85941210	55714210		13950210	11281210	298210		5.35819e+07	8.50988e+06		0.15882	0.0848463				Prominin-1	Prom1
455120000	191060000	258310000		40932000	26305000	81850000		455418210	191358210	258608210		41230210	26603210	82148210		3.01795e+08	4.99939e+07		0.165655	0.0358545				Insulin-like 3;Insulin-like 3 B chain;Insulin-like 3 A chain	Insl3
124730000	168660000	190540000		32364000	25291000	21991000		125028210	168958210	190838210		32662210	25589210	22289210		161608210	2.68469e+07		0.166123	0.00234002				TAF6-like RNA polymerase II p300/CBP-associated factor-associated factor 65 kDa subunit 6L	Taf6l
89635000	105030000	167380000		60547000	0	0		89933210	105328210	167678210		60845210	298210	298210		1.2098e+08	2.04805e+07		0.169289	0.032186				Mitochondrial import receptor subunit TOM7 homolog	Tomm7
54479000	119310000	102040000		0	46135000	0		54777210	119608210	102338210		298210	46433210	298210		92241210	1.56765e+07		0.169952	0.0364202				Peroxisomal targeting signal 2 receptor	Pex7
177820000	179130000	4439400000		52537000	59495000	706140000		178118210	179428210	4439698210		52835210	59793210	706438210		1.59908e+09	273022210		0.170737	0.408262				Tropomyosin alpha-1 chain	Tpm1
19374000	0	88195000		3859500	14178000	0		19672210	298210	88493210		4157710	14476210	298210		3.61545e+07	6310710		0.174548	0.332488					Gm2042;Gm13023;Oog1
235140000	102910000	113020000		0	36959000	41380000		235438210	103208210	113318210		298210	37257210	41678210		1.50655e+08	26411210		0.175309	0.0491206				Testosterone 17-beta-dehydrogenase 3	Hsd17b3
23053000	26121000	33358000		0	14327000	0		23351210	26419210	33656210		298210	14625210	298210		2.78089e+07	5.07388e+06		0.182455	0.0159925				Lathosterol oxidase	Sc5d
76695000	127490000	66509000		24569000	9233600	15474000		76993210	127788210	66807210		24867210	9531810	15772210		9.05295e+07	1.67237e+07		0.184732	0.0189619					Dnah7b	IDA
36101000	0	39402000		0	0	13314000		36399210	298210	39700210		298210	298210	13612210		2.54659e+07	4736210		0.185983	0.196168				FK506-binding protein-like	Fkbpl
128530000	16666000	62709000		0	0	38596000		128828210	16964210	63007210		298210	298210	38894210		6.95999e+07	1.31635e+07		0.189132	0.181332				Transforming growth factor beta-1;Latency-associated peptide	Tgfb1
56999000	45097000	50610000		0	21358000	7011900		57297210	45395210	50908210		298210	21656210	7310110		51200210	9.75484e+06		0.190524	0.00443743				Delta(14)-sterol reductase	Tm7sf2
1244000	902980	1548600		0	0	0		1542210	1201190	1846810		298210	298210	298210		1530070	298210		0.1949	0.00272131				Monocarboxylate transporter 2	Slc16a7
36205000	49933000	69463000		19639000	10616000	0		36503210	50231210	69761210		19937210	10914210	298210		52165210	10383210		0.199045	0.0202562				Ephrin-B1	Efnb1
5112800000	6438300000	7639400000		660710000	1464000000	1753600000		5113098210	6438598210	7639698210		661008210	1464298210	1753898210		6.39713e+09	1293068210		0.202133	0.00308994				Betaine--homocysteine S-methyltransferase 1	Bhmt
21081000	10362000	11309000		0	7942500	0		21379210	10660210	11607210		298210	8240710	298210		1.45489e+07	2945710		0.20247	0.0552386				EF-hand calcium-binding domain-containing protein 9	Efcab9
35379000	47086000	66351000		0	30069000	0		35677210	47384210	66649210		298210	30367210	298210		4.99035e+07	10321210		0.206823	0.042637				Mitochondrial ribonuclease P protein 1	Trmt10c
42011000	0	95600000		0	2750700	25089000		42309210	298210	95898210		298210	3048910	25387210		4.61685e+07	9578110		0.20746	0.272531				Protein FAM32A	Fam32a
143100000	87321000	66231000		0	0	61961000		143398210	87619210	66529210		298210	298210	62259210		99182210	2.09519e+07		0.211246	0.064327				Ephrin type-A receptor 4	Epha4
17214000	12249000	2379200000		520220000	0	10947000		17512210	12547210	2379498210		520518210	298210	11245210		8.03186e+08	1.77354e+08		0.220813	0.481147
141610000	80899000	117150000		0	13170000	61254000		141908210	81197210	117448210		298210	13468210	61552210		1.13518e+08	25106210		0.221165	0.026106				Bifunctional epoxide hydrolase 2;Cytosolic epoxide hydrolase 2;Lipid-phosphate phosphatase	Ephx2
36444000	29305000	25630000		0	0	19533000		36742210	29603210	25928210		298210	298210	19831210		3.07579e+07	6809210		0.221381	0.0297622				MICOS complex subunit Mic60	Immt
27403000	7612900	46069000		0	18131000	0		27701210	7911110	46367210		298210	18429210	298210		27326510	6.34188e+06		0.232078	0.172249				Non-specific protein-tyrosine kinase;Abelson tyrosine-protein kinase 2	Abl2
35958000	41179000	0		0	0	17244000		36256210	41477210	298210		298210	298210	17542210		2.60105e+07	6046210		0.232452	0.231457				LINE-1 retrotransposable element ORF1 protein
39289000	29934000	82795000		0	0	35064000		39587210	30232210	83093210		298210	298210	35362210		5.09709e+07	11986210		0.235158	0.123706				Rho GTPase-activating protein SYDE1	Syde1
22554000	27790000	33753000		0	19343000	0		22852210	28088210	34051210		298210	19641210	298210		2.83305e+07	6.74588e+06		0.238113	0.0402527				Guanine nucleotide exchange factor VAV2	Vav2
43734000	51150000	34365000		16762000	13423000	0		44032210	51448210	34663210		17060210	13721210	298210		43381210	1.03599e+07		0.23881	0.00946009				Sestrin-1	Sesn1
34354000	31305000	28659000		0	0	22218000		34652210	31603210	28957210		298210	298210	22516210		3.17375e+07	7704210		0.242748	0.0339268				Aldehyde dehydrogenase;Aldehyde dehydrogenase family 3 member B1	Aldh3b1;1700055N04Rik;Aldh3b2
43344000	35339000	34844000		0	15065000	11865000		43642210	35637210	35142210		298210	15363210	12163210		3.81405e+07	9.27488e+06		0.243176	0.00569639				Cationic amino acid transporter 4	Slc7a4
69854000	58357000	42084000		41042000	0	0		70152210	58655210	42382210		41340210	298210	298210		57063210	1.39789e+07		0.244972	0.0533305				ATR-interacting protein	Atrip
60966000	33947000	45338000		0	0	33995000		61264210	34245210	45636210		298210	298210	34293210		4.70485e+07	1.16299e+07		0.247189	0.061894				Extracellular matrix protein 1	Ecm1
93359000	9759500	4517400		4245500	8912100	12813000		93657210	10057710	4815610		4543710	9210310	13111210		3.61768e+07	8.95508e+06		0.247536	0.399359				Tapasin	Tapbp
0	3491200	12303000		0	0	3278500		298210	3789410	12601210		298210	298210	3576710		5.56294e+06	1.39104e+06		0.250055	0.336176				5-AMP-activated protein kinase subunit beta-1	Prkab1
64910000	115510000	21260000		0	0	50150000		65208210	115808210	21558210		298210	298210	50448210		6.75249e+07	1.70149e+07		0.251979	0.189097				Spatacsin	Spg11
44028000	37159000	42260000		30545000	0	0		44326210	37457210	42558210		30843210	298210	298210		41447210	1.04799e+07		0.252849	0.0406938				Signal peptidase complex catalytic subunit SEC11C	Sec11c
395930000	163050000	205830000		70721000	79598000	47226000		396228210	163348210	206128210		71019210	79896210	47524210		2.55235e+08	6.61465e+07		0.25916	0.0589062				Dual specificity protein phosphatase 13 isoform B	Dusp13
35854000	38167000	38751000		0	0	28606000		36152210	38465210	39049210		298210	298210	28904210		3.78889e+07	9.83354e+06		0.259536	0.0428279				Allograft inflammatory factor 1	Aif1
135540000	0	23994000		0	40747000	0		135838210	298210	24292210		298210	41045210	298210		53476210	1.38805e+07		0.259565	0.418207				Eukaryotic translation initiation factor 2-alpha kinase 4	Eif2ak4
20087000	26439000	17784000		0	0	16477000		20385210	26737210	18082210		298210	298210	16775210		2.17349e+07	5.79054e+06		0.266417	0.0584257				Protein arginine N-methyltransferase 3	Prmt3
5508000	7483500	5407900		1897800	0	2354300		5806210	7781710	5706110		2196010	298210	2652510		6.43134e+06	1.71558e+06		0.266752	0.00882293				L-xylulose reductase	Dcxr
14962000	11484000	0		6412400	0	0		15260210	11782210	298210		6710610	298210	298210		9.11354e+06	2.43568e+06		0.267259	0.252654				Synapsin-2	Syn2
18809000	15248000	27171000		0	0	15712000		19107210	15546210	27469210		298210	298210	16010210		2.07075e+07	5.53554e+06		0.26732	0.0742424				Lysozyme-like protein 4	Lyzl4
16953000	14219000	26623000		0	0	14963000		17251210	14517210	26921210		298210	298210	15261210		19563210	5.28588e+06		0.270195	0.0843032				Ras-related protein Rab-33B	Rab33b
0	0	32516000		8307700	0	0		298210	298210	32814210		8605910	298210	298210		1.11369e+07	3.06744e+06		0.275431	0.510615					Parp3
23445000	6638600	15045000		0	0	11798000		23743210	6936810	15343210		298210	298210	12096210		1.53411e+07	4.23088e+06		0.275787	0.149864				Coiled-coil alpha-helical rod protein 1	Cchcr1
8702400	8310800	6929900		0	6015100	0		9000610	8609010	7228110		298210	6313310	298210		8.27924e+06	2.30324e+06		0.278195	0.0450666				Poly(rC)-binding protein 2	Pcbp2
11973000000	11208000000	13345000000		2757700000	3749000000	3831100000		11973298210	11208298210	13345298210		2757998210	3749298210	3831398210		1.21756e+10	3.44623e+09		0.283043	0.00025695				Argininosuccinate synthase	Ass1;Gm5424
1934000000	2018500000	2652700000		501620000	705060000	663580000		1934298210	2018798210	2652998210		501918210	705358210	663878210		2.20203e+09	623718210		0.283247	0.00256445				UDP-glucuronosyltransferase 1-6	Ugt1a6
42879000	37704000	32637000		0	0	31679000		43177210	38002210	32935210		298210	298210	31977210		38038210	1.08579e+07		0.285447	0.06831				Sodium/potassium-transporting ATPase subunit beta-2	Atp1b2
7491100000	903900000	113960000		128680000	2227400000	110390000		7491398210	904198210	114258210		128978210	2227698210	110688210		2836618210	8.22455e+08		0.289942	0.455798
33611000	61856000	36839000		0	37781000	0		33909210	62154210	37137210		298210	38079210	298210		44400210	1.28919e+07		0.290356	0.110789				Meiosis 1 arrest protein	M1ap
44761000	87620000	39284000		0	0	49346000		45059210	87918210	39582210		298210	298210	49644210		5.75199e+07	1.67469e+07		0.291149	0.143536				Guanine nucleotide exchange factor for Rab-3A	Rab3il1
47370000	5271500	18501000		0	0	20119000		47668210	5569710	18799210		298210	298210	20417210		2.40124e+07	7.00454e+06		0.291706	0.294872				NACHT, LRR and PYD domains-containing protein 4E	Nlrp4e
53916000	0	0		0	0	15142000		54214210	298210	298210		298210	298210	15440210		18270210	5.34554e+06		0.292582	0.5268				Insulin-like growth factor-binding protein 6	Igfbp6
2502100000	1781800000	1886400000		558230000	547190000	723650000		2502398210	1782098210	1886698210		558528210	547488210	723948210		2.05706e+09	609988210		0.296533	0.00335768				Dynein heavy chain 17, axonemal	Dnah17	ODA HCβ
1931900000	1532700000	1611900000		513560000	507130000	503250000		1932198210	1532998210	1612198210		513858210	507428210	503548210		1.69246e+09	508278210		0.300318	0.000631941				Dynein heavy chain 12, axonemal	Dnah12	IAD 3
54919000	66072000	378890000		46383000	32281000	72593000		55217210	66370210	379188210		46681210	32579210	72891210		166925210	50717210		0.303832	0.337867				Protein TALPID3	2700049A03Rik;Talpid3
28776000	28906000	73868000		18253000	0	21153000		29074210	29204210	74166210		18551210	298210	21451210		44148210	1.34335e+07		0.304283	0.134467				Torsin-3A	Tor3a
1005100000	0	194460000		11165000	192390000	161640000		1005398210	298210	194758210		11463210	192688210	161938210		4.00152e+08	1.2203e+08		0.304959	0.424221				Protein Mdm4	Mdm4
59623000	52246000	52045000		13301000	15371000	21112000		59921210	52544210	52343210		13599210	15669210	21410210		54936210	1.68929e+07		0.3075	0.000370269				Proteolipid protein 2	Plp2
41870000	30661000	31060000		31299000	0	0		42168210	30959210	31358210		31597210	298210	298210		3.48285e+07	10731210		0.308115	0.0948781				Succinate dehydrogenase assembly factor 2, mitochondrial	Sdhaf2
270430000	191860000	265060000		63369000	106520000	55364000		270728210	192158210	265358210		63667210	106818210	55662210		242748210	7.53825e+07		0.310538	0.00500646				Bifunctional 3-phosphoadenosine 5-phosphosulfate synthase 2;Sulfate adenylyltransferase;Adenylyl-sulfate kinase	Papss2
9311100	7309700	18056000		0	10169000	0		9609310	7607910	18354210		298210	10467210	298210		1.18571e+07	3.68788e+06		0.311026	0.159245				SAM and SH3 domain-containing protein 1	Sash1
8708600000	1272400000	787840000		441410000	2514800000	419630000		8708898210	1272698210	788138210		441708210	2515098210	419928210		3.58991e+09	1125578210		0.313539	0.405979
22450000	33318000	33531000		7663500	19743000	0		22748210	33616210	33829210		7961710	20041210	298210		3.00645e+07	9433710		0.313782	0.0388419				Zinc finger protein 185	Zfp185;Znf185
333810000	1394300000	105300000		67875000	291130000	220330000		334108210	1394598210	105598210		68173210	291428210	220628210		6.11435e+08	1.9341e+08		0.316321	0.357686				Ubiquitin-conjugating enzyme E2 D2	Ube2d2a;Ube2d2
21505000	22760000	18050000		0	0	19136000		21803210	23058210	18348210		298210	298210	19434210		2.10699e+07	6.67688e+06		0.316892	0.0923053				Tyrosine-protein kinase;Tyrosine-protein kinase JAK1	Jak1
34127000	17442000	13876000		0	0	20214000		34425210	17740210	14174210		298210	298210	20512210		22113210	7036210		0.31819	0.176027				Uncharacterized protein C17orf50 homolog	1700020L24Rik
36986000	69074000	50231000		0	23803000	25451000		37284210	69372210	50529210		298210	24101210	25749210		52395210	16716210		0.319041	0.0453582				Ubiquitin-like protein 3	Ubl3
44973000	44947000	47276000		19415000	0	23863000		45271210	45245210	47574210		19713210	298210	24161210		46030210	14724210		0.319881	0.0131632				Biogenesis of lysosome-related organelles complex 1 subunit 4	Bloc1s4
694860000	1653400000	284670000		387110000	235420000	232990000		695158210	1653698210	284968210		387408210	235718210	233288210		8.77942e+08	2.85472e+08		0.32516	0.220793				Myelin basic protein	Mbp
41221000	66586000	49408000		50647000	0	0		41519210	66884210	49706210		50945210	298210	298210		52703210	1.71805e+07		0.325987	0.126685				EF-hand domain-containing family member B	Efhb
24764000	21640000	26179000		23302000	0	0		25062210	21938210	26477210		23600210	298210	298210		2.44925e+07	8.06554e+06		0.329306	0.105538				Kelch repeat and BTB domain-containing protein 11	Kbtbd11
47806000	32655000	50733000		24114000	19437000	0		48104210	32953210	51031210		24412210	19735210	298210		4.40295e+07	14815210		0.336483	0.0344409
49184000	21372000	47467000		0	39174000	0		49482210	21670210	47765210		298210	39472210	298210		39639210	13356210		0.336944	0.172781				ATP-dependent RNA helicase DDX54	Ddx54
280080000	256080000	269320000		95017000	70925000	106130000		280378210	256378210	269618210		95315210	71223210	106428210		2.68792e+08	9.09889e+07		0.338511	0.000141651					Dnah1	IAD 4	PCD
83518000	71560000	53890000		39008000	0	31391000		83816210	71858210	54188210		39306210	298210	31689210		69954210	2.37645e+07		0.339716	0.0348899				Transmembrane protein 248	Tmem248
138650000	222670000	183380000		0	0	184460000		138948210	222968210	183678210		298210	298210	184758210		1.81865e+08	6.17849e+07		0.33973	0.143453				Transmembrane protein 101	Tmem101
116730000	41914000	105780000		25834000	45976000	17569000		117028210	42212210	106078210		26132210	46274210	17867210		8.84395e+07	30091210		0.340246	0.078338				3-oxo-5-alpha-steroid 4-dehydrogenase 1	Srd5a1
75827000	52296000	92194000		22366000	48997000	4066400		76125210	52594210	92492210		22664210	49295210	4364610		73737210	2.54413e+07		0.345027	0.050389				Nicotinate phosphoribosyltransferase	Naprt
511900000	64782000	70340000		0	222900000	0		512198210	65080210	70638210		298210	223198210	298210		215972210	74598210		0.345407	0.441662
16390000	0	0		0	0	5080200		16688210	298210	298210		298210	298210	5378410		5.76154e+06	1991610		0.345673	0.545839				Keratin, type I cytoskeletal 18	Krt18
20698000	23398000	22177000		0	0	22345000		20996210	23696210	22475210		298210	298210	22643210		22389210	7.74654e+06		0.345994	0.122227				Spastin	Spast
24669000	51925000	47878000		42623000	0	0		24967210	52223210	48176210		42921210	298210	298210		4.17889e+07	1.45059e+07		0.347123	0.17463				Ankyrin-3	Ank3
37766000	121030000	44439000		48344000	0	22941000		38064210	121328210	44737210		48642210	298210	23239210		68043210	2.40599e+07		0.353597	0.218259				HCLS1-binding protein 3	Hs1bp3
25718000	22933000	28959000		0	0	26878000		26016210	23231210	29257210		298210	298210	27176210		26168210	9.25754e+06		0.353771	0.137539				High affinity immunoglobulin epsilon receptor subunit gamma	Fcer1g
33584000	0	0		11346000	0	0		33882210	298210	298210		11644210	298210	298210		1.14929e+07	4080210		0.355021	0.564474					Rsph10b
24709000	50928000	52217000		0	27053000	17860000		25007210	51226210	52515210		298210	27351210	18158210		42916210	15269210		0.355791	0.0821444				RasGAP-activating-like protein 1	Rasal1
18931000	18167000	20713000		0	0	20110000		19229210	18465210	21011210		298210	298210	20408210		1.95685e+07	7.00154e+06		0.357796	0.135931				Leydig cell tumor 10 kDa protein homolog	D8Ertd738e
87892000	52067000	35820000		0	0	62727000		88190210	52365210	36118210		298210	298210	63025210		58891210	21207210		0.360108	0.220205					Dmrtb1
9391600	0	11239000		0	0	6938100		9689810	298210	11537210		298210	298210	7236310		7.17508e+06	2610910		0.363886	0.33603				PGAP2-interacting protein	Cwh43
4626600	156650000	30371000		25424000	19374000	24523000		4924810	156948210	30669210		25722210	19672210	24821210		6.41807e+07	23405210		0.364677	0.434698				Glycerophosphodiester phosphodiesterase 1	Gde1
29029000	18649000	0		0	0	17023000		29327210	18947210	298210		298210	298210	17321210		1.61909e+07	5.97254e+06		0.368883	0.373709				Complement component C9	C9
34169000	28333000	47049000		6212500	33650000	0		34467210	28631210	47347210		6510710	33948210	298210		36815210	13585710		0.369024	0.118608				Membrane-associated phosphatidylinositol transfer protein 2	Pitpnm2
1125900000	1505900000	1629500000		434240000	537070000	604080000		1126198210	1506198210	1629798210		434538210	537368210	604378210		1.42073e+09	525428210		0.369829	0.00493562				UDP-glucuronosyltransferase 1-7C	Ugt1a7c
42197000	53873000	59798000		13228000	0	44006000		42495210	54171210	60096210		13526210	298210	44304210		52254210	19376210		0.370807	0.0789941				Coiled-coil-helix-coiled-coil-helix domain-containing protein 5	Chchd5
9045000	1661000	6950100		0	6002900	0		9343210	1959210	7248310		298210	6301110	298210		6.18358e+06	2.29918e+06		0.37182	0.261242				HAUS augmin-like complex subunit 2	Haus2
41923000	0	15166000		20674000	0	0		42221210	298210	15464210		20972210	298210	298210		1.93279e+07	7.18954e+06		0.371978	0.436651				General transcription factor IIH subunit 5	Gtf2h5
66141000	80642000	79999000		83856000	0	0		66439210	80940210	80297210		84154210	298210	298210		75892210	28250210		0.372241	0.16815				UDP-xylose and UDP-N-acetylglucosamine transporter	Slc35b4
34626000	45432000	28539000		0	16411000	23550000		34924210	45730210	28837210		298210	16709210	23848210		36497210	1.36185e+07		0.373139	0.0553631				Coiled-coil domain-containing protein C16orf93 homolog	Gm166
0	94719000	22265000		0	20282000	23324000		298210	95017210	22563210		298210	20580210	23622210		3.92929e+07	1.48335e+07		0.377512	0.45387				Phosphatidylcholine-sterol acyltransferase	Lcat
71787000	70915000	0		0	41339000	12335000		72085210	71213210	298210		298210	41637210	12633210		4.78655e+07	1.81895e+07		0.380013	0.329554				Endophilin-A3	Sh3gl3
11169000	38467000	20201000		0	19923000	6115400		11467210	38765210	20499210		298210	20221210	6413610		23577210	8.97768e+06		0.380778	0.216549				Interferon-induced protein 44	Ifi44
40194000	22170000	9927500		8438000	5287600	13323000		40492210	22468210	10225710		8736210	5585810	13621210		2.43954e+07	9314410		0.38181	0.172649				BTB/POZ domain-containing protein KCTD7	Kctd7
26651000	22935000	24144000		11877000	0	15953000		26949210	23233210	24442210		12175210	298210	16251210		2.48749e+07	9.57488e+06		0.384922	0.0356345				Inhibitor of Bruton tyrosine kinase	Ibtk
48269000	41058000	30846000		0	0	46053000		48567210	41356210	31144210		298210	298210	46351210		4.03559e+07	15649210		0.38778	0.201063				Caspase;Caspase-9;Caspase-9 subunit p35;Caspase-9 subunit p10	Casp9
30299000	0	25403000		21078000	0	0		30597210	298210	25701210		21376210	298210	298210		1.88655e+07	7324210		0.388232	0.380793				Supervillin	Svil
40233000	36770000	27030000		0	0	39854000		40531210	37068210	27328210		298210	298210	40152210		3.49759e+07	1.35829e+07		0.38835	0.197586				Mitogen-activated protein kinase kinase kinase kinase;Mitogen-activated protein kinase kinase kinase kinase 5	Map4k5
4930100	3902500	4255500		0	2402900	2147600		5228310	4200710	4553710		298210	2701110	2445810		4660910	1.81504e+06		0.389418	0.0255162				N-myc proto-oncogene protein	Mycn
118880000	39641000	26222000		47110000	13172000	11160000		119178210	39939210	26520210		47408210	13470210	11458210		61879210	24112210		0.389666	0.29238				Kinesin-like protein KIF20B	Kif20b
803290000	582410000	711610000		208990000	364210000	252200000		803588210	582708210	711908210		209288210	364508210	252498210		6.99402e+08	2.75432e+08		0.39381	0.00582518				Large neutral amino acids transporter small subunit 2	Slc7a8
9603500	17281000	18499000		0	0	17494000		9901710	17579210	18797210		298210	298210	17792210		1.5426e+07	6.12954e+06		0.39735	0.223647				Spindle assembly abnormal protein 6 homolog	Sass6
14177000	0	23921000		0	0	14668000		14475210	298210	24219210		298210	298210	14966210		1.29975e+07	5.18754e+06		0.399117	0.409843				Armadillo repeat-containing X-linked protein 2	Armcx2
13705000	12965000	0		0	10123000	0		14003210	13263210	298210		298210	10421210	298210		9188210	3.67254e+06		0.399702	0.379247				Proton-coupled amino acid transporter 1	Slc36a1
33625000	21386000	27890000		10336000	22266000	0		33923210	21684210	28188210		10634210	22564210	298210		2.79319e+07	1.11655e+07		0.399742	0.0844081				Phytanoyl-CoA dioxygenase, peroxisomal	Phyh
16109000	17506000	18108000		17600000	0	2636300		16407210	17804210	18406210		17898210	298210	2934510		17539210	7.04364e+06		0.401594	0.129634				NADH dehydrogenase [ubiquinone] 1 alpha subcomplex assembly factor 4	Ndufaf4
11257000	6824000	2014800000		812460000	0	8824000		11555210	7122210	2015098210		812758210	298210	9122210		677925210	2.7406e+08		0.404262	0.605173					5430421N21Rik
41498000	59104000	56942000		27886000	0	35394000		41796210	59402210	57240210		28184210	298210	35692210		5.28129e+07	2.13915e+07		0.405044	0.0603917				6-phosphofructo-2-kinase/fructose-2,6-bisphosphatase 2;6-phosphofructo-2-kinase;Fructose-2,6-bisphosphatase	Pfkfb2
115810000	150250000	125950000		99738000	0	59191000		116108210	150548210	126248210		100036210	298210	59489210		130968210	5.32745e+07		0.406775	0.0646647				Breast cancer anti-estrogen resistance protein 1	Bcar1
53334000	51154000	46755000		16482000	0	44532000		53632210	51452210	47053210		16780210	298210	44830210		5.07125e+07	20636210		0.406925	0.083994				Putative gamma-secretase subunit APH-1C	Aph1c
12900000000	9637800000	11117000000		3559700000	5463300000	4943400000		12900298210	9638098210	11117298210		3559998210	5463598210	4943698210		1.12186e+10	4.65576e+09		0.415005	0.00397634				Epoxide hydrolase 1	Ephx1
294900000	246410000	194210000		95116000	81072000	129790000		295198210	246708210	194508210		95414210	81370210	130088210		2.45472e+08	1.02291e+08		0.416712	0.0116146					Dnah6	IAD 5
26851000	17849000	33350000		10185000	21873000	0		27149210	18147210	33648210		10483210	22171210	298210		2.63149e+07	10984210		0.417414	0.119203				Polyphosphoinositide phosphatase	Fig4
185160000	165120000	270090000		58111000	96689000	103710000		185458210	165418210	270388210		58409210	96987210	104008210		207088210	86468210		0.417543	0.0265176				Pro-cathepsin H;Cathepsin H mini chain;Cathepsin H;Cathepsin H heavy chain;Cathepsin H light chain	Ctsh
7300700000	7521300000	9409300000		2724600000	3633500000	3858100000		7300998210	7521598210	9409598210		2724898210	3633798210	3858398210		8077398210	3405698210		0.421633	0.00344243				3 beta-hydroxysteroid dehydrogenase/Delta 5-->4-isomerase type 6;3-beta-hydroxy-Delta(5)-steroid dehydrogenase;Steroid Delta-isomerase;3 beta-hydroxysteroid dehydrogenase/Delta 5-->4-isomerase type 3;3-beta-hydroxy-Delta(5)-steroid dehydrogenase;Steroid Delta-isomerase	Hsd3b6;Hsd3b3
639710000	667140000	645100000		263570000	298070000	264620000		640008210	667438210	645398210		263868210	298368210	264918210		650948210	275718210		0.423564	1.18439e-05				Serum paraoxonase/lactonase 3	Pon3
3881000000	3084300000	3215200000		1179900000	1666900000	1526300000		3881298210	3084598210	3215498210		1180198210	1667198210	1526598210		3393798210	1457998210		0.429607	0.0024851				Cytosolic 10-formyltetrahydrofolate dehydrogenase	Aldh1l1
52482000000	32842000000	43369000000		12753000000	22625000000	20017000000		52482298210	32842298210	43369298210		12753298210	22625298210	20017298210		4.2898e+10	18465298210		0.430447	0.0187893				Steroid 17-alpha-hydroxylase/17,20 lyase	Cyp17a1
27207000	28963000	37764000		39976000	0	0		27505210	29261210	38062210		40274210	298210	298210		3.16095e+07	1.36235e+07		0.430995	0.260067				NAD-dependent protein deacylase sirtuin-5, mitochondrial	Sirt5
21639000	17496000	34538000		0	5221700	26045000		21937210	17794210	34836210		298210	5519910	26343210		2.48559e+07	1.07204e+07		0.431304	0.209692				Protein Spindly	Spdl1
447410000	553820000	740360000		216250000	280420000	254970000		447708210	554118210	740658210		216548210	280718210	255268210		580828210	2.50845e+08		0.431874	0.0196744				Vascular cell adhesion protein 1	Vcam1
139630000	74095000	68723000		34784000	45233000	41839000		139928210	74393210	69021210		35082210	45531210	42137210		9.44475e+07	4.09169e+07		0.433223	0.0804789				Glutathione S-transferase Mu 3	Gstm3
5971000	0	4270800		0	3941600	0		6269210	298210	4569010		298210	4239810	298210		3.71214e+06	1.61208e+06		0.434271	0.39565				E3 ubiquitin-protein ligase SMURF1;E3 ubiquitin-protein ligase SMURF2	Smurf1;Smurf2
140530000	158480000	156810000		100300000	52740000	44477000		140828210	158778210	157108210		100598210	53038210	44775210		152238210	66137210		0.434432	0.00929682				Bcl-2 homologous antagonist/killer	Bak1
0	27806000	40233000		0	29239000	0		298210	28104210	40531210		298210	29537210	298210		2.29779e+07	1.00445e+07		0.43714	0.447643				Adenosine 3-phospho 5-phosphosulfate transporter 2	Slc35b3
23962000	259770000	275800000		58927000	62786000	122570000		24260210	260068210	276098210		59225210	63084210	122868210		1.86809e+08	8.17259e+07		0.437484	0.278979				EH domain-binding protein 1	Ehbp1
78583000	21088000	52430000		8753000	57314000	0		78881210	21386210	52728210		9051210	57612210	298210		5.09985e+07	2.23205e+07		0.43767	0.304561				Testis-expressed sequence 2 protein	Tex2
1569600000	1049200000	0		0	1151100000	0		1569898210	1049498210	298210		298210	1151398210	298210		8.73232e+08	383998210		0.439744	0.460788				Triple functional domain protein	Trio
221640000	192910000	188420000		81356000	77610000	106710000		221938210	193208210	188718210		81654210	77908210	107008210		201288210	8.88569e+07		0.441441	0.00125226				Transmembrane protein 164	Tmem164
73510000	98435000	63096000		5121600	55486000	42664000		73808210	98733210	63394210		5419810	55784210	42962210		78645210	3.47221e+07		0.441503	0.0753206				TPR and ankyrin repeat-containing protein 1	Trank1
19517000	29259000	33814000		2966700	0	33095000		19815210	29557210	34112210		3264910	298210	33393210		27828210	1.23188e+07		0.442672	0.244669				Immunoglobulin-binding protein 1	Igbp1
9903800	21853000	9550500		11592000	6213700	0		10202010	22151210	9848710		11890210	6511910	298210		14067310	6.23344e+06		0.443116	0.209952				RNA-binding protein 39	Rbm39
542700000	69810000	54153000		54623000	240480000	0		542998210	70108210	54451210		54921210	240778210	298210		222519210	9.86659e+07		0.443404	0.520537
23005000	0	11267000		14701000	0	0		23303210	298210	11565210		14999210	298210	298210		11722210	5.19854e+06		0.443478	0.473514				Uncharacterized protein KIAA0513	6430548M08Rik;Kiaa0513
3321100000	2626700000	2581400000		946530000	1018600000	1817300000		3321398210	2626998210	2581698210		946828210	1018898210	1817598210		2.84336e+09	1261108210		0.443527	0.0126065				Sterol-4-alpha-carboxylate 3-dehydrogenase, decarboxylating	Nsdhl
273690000	245540000	243170000		101470000	103750000	132590000		273988210	245838210	243468210		101768210	104048210	132888210		2.54432e+08	1.12902e+08		0.44374	0.000540882				Sulfotransferase;Sulfotransferase 1A1	Sult1a1
31348000	28133000	23589000		0	17914000	18532000		31646210	28431210	23887210		298210	18212210	18830210		27988210	1.24469e+07		0.444719	0.0745004				CCR4-NOT transcription complex subunit 6	Cnot6
291820000	315270000	203000000		178730000	0	182830000		292118210	315568210	203298210		179028210	298210	183128210		270328210	120818210		0.446932	0.0971503					Dnah10	IDA 1α
206580000	57848000	87042000		19302000	82218000	55145000		206878210	58146210	87340210		19600210	82516210	55443210		1.17455e+08	5.25199e+07		0.447149	0.255828				IQ domain-containing protein E	Iqce
47839000	44069000	55774000		0	38226000	27389000		48137210	44367210	56072210		298210	38524210	27687210		4.95255e+07	2.21699e+07		0.447645	0.082803				LanC-like protein 3	Lancl3
41841000	27376000	47140000		7557500	0	44294000		42139210	27674210	47438210		7855710	298210	44592210		3.90839e+07	1.7582e+07		0.449854	0.222495				Centrosomal protein of 112 kDa	Cep112
25641000	28792000	14374000		30469000	0	0		25939210	29090210	14672210		30767210	298210	298210		2.32339e+07	1.04545e+07		0.44997	0.312191				MAP kinase-activated protein kinase 3	Mapkapk3
0	15713000	16111000		0	10851000	3032300		298210	16011210	16409210		298210	11149210	3330510		10906210	4.92598e+06		0.451667	0.390247				Calcium homeostasis modulator protein 2	Calhm2
72638000	68627000	55544000		57116000	0	31642000		72936210	68925210	55842210		57414210	298210	31940210		65901210	29884210		0.45347	0.105901				WD repeat-containing protein 59	Wdr59
13236000	38828000	48187000		20541000	24466000	0		13534210	39126210	48485210		20839210	24764210	298210		33715210	1.53005e+07		0.453817	0.226911				Nucleolar protein 16	Nop16
52328000	30886000	37130000		0	29104000	25042000		52626210	31184210	37428210		298210	29402210	25340210		4.04129e+07	1.83469e+07		0.453986	0.117885					1700006A11Rik
126480000	94400000	66387000		45185000	24356000	60426000		126778210	94698210	66685210		45483210	24654210	60724210		9.60539e+07	4.36205e+07		0.454126	0.0608531				Mitogen-activated protein kinase 14	Mapk14
228150000	179340000	69634000		88051000	57633000	70746000		228448210	179638210	69932210		88349210	57931210	71044210		1.5934e+08	7.24415e+07		0.454636	0.142536				Torsin-1B	Tor1b
153160000	324480000	153910000		47366000	112680000	127880000		153458210	324778210	154208210		47664210	112978210	128178210		2.10815e+08	9.62735e+07		0.456673	0.138897				Galectin-3-binding protein	Lgals3bp
114190000	153340000	128640000		74642000	60582000	45396000		114488210	153638210	128938210		74940210	60880210	45694210		1.32355e+08	6.05049e+07		0.457141	0.00720133				Kidney mitochondrial carrier protein 1	Slc25a30
24966000	27795000	7666200		27241000	0	0		25264210	28093210	7964410		27539210	298210	298210		20440610	9.37854e+06		0.458819	0.373311				Coiled-coil domain-containing protein 7	Ccdc7
51878000	65538000	95971000		0	0	97699000		52176210	65836210	96269210		298210	298210	97997210		71427210	3.28645e+07		0.460112	0.333327				Tyrosine-protein phosphatase non-receptor type 13	Ptpn13
188710000	69773000	69152000		73742000	77312000	0		189008210	70071210	69450210		74040210	77610210	298210		1.0951e+08	5.06495e+07		0.462511	0.279217				Collectin-12	Colec12
181170000	169400000	158080000		36815000	45555000	152730000		181468210	169698210	158378210		37113210	45853210	153028210		169848210	7.86649e+07		0.463148	0.0736727				Gamma-aminobutyric acid receptor-associated protein-like 1;Gamma-aminobutyric acid receptor-associated protein	Gabarapl1;Gabarap
5425600	0	17414000		0	0	10101000		5723810	298210	17712210		298210	298210	10399210		7911410	3665210		0.463282	0.527795				Ribosomal protein S6 kinase;Ribosomal protein S6 kinase alpha-6	Rps6ka6
1315700000	1045700000	1138700000		492570000	542040000	587650000		1315998210	1045998210	1138998210		492868210	542338210	587948210		1166998210	5.41052e+08		0.463627	0.00171815				Axonemal dynein light intermediate polypeptide 1	Dnali1	IDA	pcd
42904000	79267000	41806000		21080000	15418000	39183000		43202210	79565210	42104210		21378210	15716210	39481210		54957210	25525210		0.464456	0.10766				Nucleoside diphosphate-linked moiety X motif 17	Nudt17
1958200000	1864000000	1592100000		835740000	804530000	880020000		1958498210	1864298210	1592398210		836038210	804828210	880318210		1.80506e+09	8.40395e+08		0.465576	0.000995986					Dnah7c	IAD 3
32774000	78320000	65764000		38631000	16010000	27286000		33072210	78618210	66062210		38929210	16308210	27584210		5.92509e+07	27607210		0.465938	0.103682				Dehydrogenase/reductase SDR family member on chromosome X homolog	Dhrsx
37146000	0	0		8279900	8565700	0		37444210	298210	298210		8578110	8863910	298210		12680210	5913410		0.46635	0.622294				Probable C-mannosyltransferase DPY19L4	Dpy19l4
107910000	124460000	89953000		15292000	81844000	52809000		108208210	124758210	90251210		15590210	82142210	53107210		107739210	5.02799e+07		0.466681	0.0570214				Probable D-lactate dehydrogenase, mitochondrial	Ldhd
117700000	12568000	0		24755000	14139000	21470000		117998210	12866210	298210		25053210	14437210	21768210		4.37209e+07	2.04195e+07		0.467043	0.567494				Solute carrier family 25 member 36;Solute carrier family 25 member 33	Slc25a36;Slc25a33
52233000	84681000	78392000		33132000	0	66967000		52531210	84979210	78690210		33430210	298210	67265210		7.20669e+07	3.36645e+07		0.467129	0.152007				Ras-related protein Rap-2a	Rap2a
0	169660000	204560000		0	79914000	94760000		298210	169958210	204858210		298210	80212210	95058210		125038210	5.85229e+07		0.46804	0.393938				Katanin p60 ATPase-containing subunit A1	Katna1
43228000	239500000	21437000		56481000	37281000	48203000		43526210	239798210	21735210		56779210	37579210	48501210		1.01687e+08	4.76199e+07		0.468301	0.480432					Ddx31
631630000	450080000	562250000		197460000	253740000	320110000		631928210	450378210	562548210		197758210	254038210	320408210		5.48285e+08	2.57402e+08		0.469467	0.0102721				Carboxymethylenebutenolidase homolog	Cmbl
241840000	240850000	212970000		118940000	24993000	183220000		242138210	241148210	213268210		119238210	25291210	183518210		2.32185e+08	109349210		0.470958	0.0588806					0610009B22Rik
491480000	223350000	578390000		140900000	15878000	452050000		491778210	223648210	578688210		141198210	16176210	452348210		4.31372e+08	2.03241e+08		0.47115	0.2461				Y+L amino acid transporter 2	Slc7a6
31291000	68043000	28629000		31461000	28448000	0		31589210	68341210	28927210		31759210	28746210	298210		4.29525e+07	2.02679e+07		0.471867	0.233836				HAUS augmin-like complex subunit 7	Haus7
104740000	115720000	78627000		41529000	73104000	26054000		105038210	116018210	78925210		41827210	73402210	26352210		9.99939e+07	4.71939e+07		0.471968	0.0405022				Zinc finger CCCH-type with G patch domain-containing protein	Zgpat
8252600000	8369100000	7387200000		2969300000	4311600000	4087800000		8252898210	8369398210	7387498210		2969598210	4311898210	4088098210		8.00326e+09	3.78986e+09		0.47354	0.00124264				Glutamine synthetase	Glul
25511000	24304000	27959000		0	11750000	24626000		25809210	24602210	28257210		298210	12048210	24924210		2.62229e+07	1.24235e+07		0.473767	0.12747				Metalloproteinase inhibitor 2	Timp2
0	9961900	8472400		0	8302100	0		298210	10260110	8770610		298210	8600310	298210		6.44298e+06	3.06558e+06		0.475801	0.462138				Heterogeneous nuclear ribonucleoprotein U-like protein 1	Hnrnpul1
58927000	66379000	61555000		0	45760000	43028000		59225210	66677210	61853210		298210	46058210	43326210		62585210	29894210		0.477656	0.0944818				Bcl-2-like protein 1	Bcl2l1
78145000	0	9972100		15164000	20090000	6476200		78443210	298210	10270310		15462210	20388210	6774410		2.96706e+07	1.42083e+07		0.478868	0.567894				Calcium-activated potassium channel subunit beta-4	Kcnmb4
254390000	189670000	321250000		161580000	117870000	86908000		254688210	189968210	321548210		161878210	118168210	87206210		2.55402e+08	1.22418e+08		0.479314	0.0383566				Peroxisomal 2,4-dienoyl-CoA reductase	Decr2
125530000	118270000	105400000		0	85308000	81970000		125828210	118568210	105698210		298210	85606210	82268210		116698210	5.60575e+07		0.480363	0.100551				Protein phosphatase 1 regulatory subunit 11	Ppp1r11
5153600	5130200	7355500		0	8102300	0		5451810	5428410	7653710		298210	8400510	298210		6.17798e+06	2.99898e+06		0.48543	0.319605				DDB1- and CUL4-associated factor 13	Dcaf13
97211000	0	0		0	46792000	0		97509210	298210	298210		298210	47090210	298210		3.27019e+07	1.58955e+07		0.486074	0.664583				Transmembrane protein 68	Tmem68
7683000	0	8593200		7452000	0	0		7981210	298210	8891410		7750210	298210	298210		5723610	2782210		0.486094	0.469741					Gbp7
0	37532000	61000000		21913000	18029000	7597900		298210	37830210	61298210		22211210	18327210	7896110		33142210	1.61448e+07		0.487138	0.40489					Actc1
26824000	29226000	32639000		0	20605000	22299000		27122210	29524210	32937210		298210	20903210	22597210		29861210	1.45995e+07		0.488913	0.106905				Two pore calcium channel protein 1	Tpcn1
47665000	76910000	45787000		22345000	37701000	22886000		47963210	77208210	46085210		22643210	37999210	23184210		5.70855e+07	27942210		0.48948	0.0608287				Beta-arrestin-1	Arrb1
760460000	377910000	423210000		276630000	292780000	195500000		760758210	378208210	423508210		276928210	293078210	195798210		5.20825e+08	255268210		0.490123	0.0996299				Glutathione S-transferase kappa 1	Gstk1
12528000	41838000	16830000		18396000	0	16111000		12826210	42136210	17128210		18694210	298210	16409210		24030210	1.18005e+07		0.491071	0.321427				Protein-lysine N-methyltransferase EEF2KMT	Eef2kmt
47410000	0	59022000		0	0	51942000		47708210	298210	59320210		298210	298210	52240210		3.57755e+07	17612210		0.492297	0.507962				Ras-related protein Rab-43	Rab43
105340000	123400000	125230000		73173000	37107000	63567000		105638210	123698210	125528210		73471210	37405210	63865210		118288210	58247210		0.492418	0.00865861				Protein diaphanous homolog 3	Diap3;Diaph3
49405000	38366000	50279000		15848000	51727000	0		49703210	38664210	50577210		16146210	52025210	298210		4.63149e+07	22823210		0.492784	0.210653				Serine/threonine-protein kinase WNK4	Wnk4
17665000	40474000	0		0	10141000	18121000		17963210	40772210	298210		298210	10439210	18419210		1.96779e+07	9.71888e+06		0.493899	0.48112				Protein FAN	Nsmaf
68355000	70208000	88442000		52128000	14630000	45121000		68653210	70506210	88740210		52426210	14928210	45419210		7.59665e+07	37591210		0.494839	0.0435555				Alpha-ketoglutarate-dependent dioxygenase alkB homolog 7, mitochondrial	Alkbh7
71412000	26397000	0		0	48300000	0		71710210	26695210	298210		298210	48598210	298210		32901210	16398210		0.498408	0.564947				Dystrobrevin;Dystrobrevin alpha	Dtna
860730000	665080000	741060000		384010000	260640000	485180000		861028210	665378210	741358210		384308210	260938210	485478210		7.55922e+08	376908210		0.498608	0.0117943				Elongation of very long chain fatty acids protein;Elongation of very long chain fatty acids protein 5	Elovl5
18812000	18220000	26128000		14476000	0	16579000		19110210	18518210	26426210		14774210	298210	16877210		2.13515e+07	1.06499e+07		0.498787	0.138707				Trans-Golgi network integral membrane protein 2	Tgoln2
374310000	324540000	211280000		39638000	162490000	251420000		374608210	324838210	211578210		39936210	162788210	251718210		3.03675e+08	1.51481e+08		0.498826	0.123069					Sly;Gm29866;Gm28576;Gm21497;Gm20814;Gm21095;Gm20736;Gm20843;Gm21117;Gm29564;Gm21865;Gm21760;Gm20916;Gm21294;Gm21488;Gm21650;Gm20824;Gm20820;Gm21858;Gm28510;Gm21739;Gm28490;Gm21209;Gm20911;Gm28102;Gm21996;Gm28919
10976000	0	10197000		0	10143000	0		11274210	298210	10495210		298210	10441210	298210		7.35588e+06	3679210		0.500173	0.494137				UPF0317 protein C14orf159 homolog, mitochondrial	9030617O03Rik
17379000	0	34728000		0	0	25617000		17677210	298210	35026210		298210	298210	25915210		17667210	8837210		0.500204	0.53925				Sorting nexin-11	Snx11
66166000	47234000	72587000		44822000	47958000	0		66464210	47532210	72885210		45120210	48256210	298210		6.22939e+07	3.12249e+07		0.501251	0.146197				4-hydroxy-2-oxoglutarate aldolase, mitochondrial	Hoga1
20859000	33179000	30333000		0	20483000	21431000		21157210	33477210	30631210		298210	20781210	21729210		2.84219e+07	1.42695e+07		0.502062	0.148525				Regulator of G-protein signaling 3	Rgs3
18454000	13567000	22864000		7523700	12119000	7490200		18752210	13865210	23162210		7821910	12417210	7788410		18593210	9342510		0.502469	0.040342					Itpkb
334420000	328560000	304030000		136560000	178300000	172300000		334718210	328858210	304328210		136858210	178598210	172598210		3.22635e+08	1.62685e+08		0.504238	0.000564384				U4/U6.U5 small nuclear ribonucleoprotein 27 kDa protein	Snrnp27
85998000	77934000	51386000		108420000	0	0		86296210	78232210	51684210		108718210	298210	298210		7.20709e+07	36438210		0.505589	0.397208				Beta-1,3-galactosyltransferase 6	B3galt6
7508700	10938000	0		0	8894100	0		7806910	11236210	298210		298210	9192310	298210		6447110	3262910		0.506104	0.507887				Protein C12orf4 homolog	D6Wsu163e
14598000	5862700	6795400		0	8769500	4624800		14896210	6160910	7093610		298210	9067710	4923010		9.38358e+06	4.76298e+06		0.507586	0.285694					Parp10
150980000	311130000	134010000		122890000	94539000	84820000		151278210	311428210	134308210		123188210	94837210	85118210		1.99005e+08	1.01048e+08		0.507766	0.164054				Receptor expression-enhancing protein 6;Receptor expression-enhancing protein	Reep6
41221000	34345000	23882000		15636000	11996000	22466000		41519210	34643210	24180210		15934210	12294210	22764210		3.34475e+07	1.69975e+07		0.508185	0.0494435				Uncharacterized protein C9orf85 homolog	1110059E24Rik
668770000	773920000	499880000		439600000	230190000	317690000		669068210	774218210	500178210		439898210	230488210	317988210		6.47822e+08	329458210		0.508563	0.0337155				2-oxoisovalerate dehydrogenase subunit beta, mitochondrial	Bckdhb
388310000	228660000	237230000		218160000	151500000	64322000		388608210	228958210	237528210		218458210	151798210	64620210		2.85032e+08	1.44959e+08		0.508571	0.10978				DBIRD complex subunit ZNF326	Znf326
202590000	90235000	97417000		113810000	51039000	33355000		202888210	90533210	97715210		114108210	51337210	33653210		1.30379e+08	66366210		0.509026	0.217311				Gamma-glutamyl hydrolase	Ggh
79078000	33092000	45702000		27913000	24401000	27671000		79376210	33390210	46000210		28211210	24699210	27969210		52922210	2.69599e+07		0.509425	0.132352				PAB-dependent poly(A)-specific ribonuclease subunit PAN2	Pan2
11040000000	11061000000	11429000000		5138600000	5748400000	6207900000		11040298210	11061298210	11429298210		5138898210	5748698210	6208198210		1.1177e+10	5698598210		0.509852	8.13254e-05					Akr1cl
6683300	4015800	10685000		4417900	0	6060000		6981510	4314010	10983210		4716110	298210	6358210		7.42624e+06	3.79084e+06		0.510466	0.242239				Serine/threonine-protein kinase 26	Stk26
3591700000	3881400000	2749400000		1034000000	1826200000	2369900000		3591998210	3881698210	2749698210		1034298210	1826498210	2370198210		3407798210	1.74366e+09		0.511669	0.0320234				Alanine aminotransferase 2	Gpt2
59042000	48467000	85035000		43332000	23373000	31470000		59340210	48765210	85333210		43630210	23671210	31768210		6.44795e+07	33023210		0.51215	0.0629996				A-kinase anchor protein 7 isoform gamma	Akap7
9334000000	8888800000	8075600000		674870000	3402500000	9442300000		9334298210	8889098210	8075898210		675168210	3402798210	9442598210		8.76643e+09	4.50685e+09		0.514104	0.178863				Alpha-1-antitrypsin 1-5	Serpina1e
36509000	25745000	27148000		22798000	0	22801000		36807210	26043210	27446210		23096210	298210	23099210		3.00989e+07	1.54979e+07		0.514899	0.154012				Nuclear transcription factor Y subunit beta	Nfyb
50550000	55157000	57703000		41365000	0	42359000		50848210	55455210	58001210		41663210	298210	42657210		54768210	28206210		0.515011	0.13296				Trans-L-3-hydroxyproline dehydratase	L3hypdh
175290000	186730000	112500000		63311000	42731000	138140000		175588210	187028210	112798210		63609210	43029210	138438210		1.58472e+08	81692210		0.515501	0.106953				Ubiquitin-like protein ATG12	Atg12
477140000	404290000	179590000		101680000	222830000	223570000		477438210	404588210	179888210		101978210	223128210	223868210		3.53972e+08	1.82992e+08		0.516967	0.156895				Complement component C8 gamma chain	C8g
99518000	44517000	30439000		44154000	45625000	0		99816210	44815210	30737210		44452210	45923210	298210		58456210	3.02245e+07		0.517046	0.336154				Splicing factor U2AF 26 kDa subunit	U2af1l4
201720000	185430000	324100000		89810000	118110000	160280000		202018210	185728210	324398210		90108210	118408210	160578210		2.37382e+08	1.23032e+08		0.518286	0.0770896				Probable 2-oxoglutarate dehydrogenase E1 component DHKTD1, mitochondrial	Dhtkd1
587790000	609880000	513980000		256790000	288610000	343280000		588088210	610178210	514278210		257088210	288908210	343578210		570848210	2.96525e+08		0.519446	0.00204148				Rho GDP-dissociation inhibitor 2	Arhgdib
44421000	99561000	69975000		29436000	37279000	44033000		44719210	99859210	70273210		29734210	37577210	44331210		71617210	37214210		0.519627	0.105129				Inositol-trisphosphate 3-kinase A	Itpka
4088100	124190000	1792000		32674000	34610000	0		4386310	124488210	2090210		32972210	34908210	298210		43654910	22726210		0.520588	0.644061				Probable ATP-dependent RNA helicase DDX56	Ddx56
0	12842000	13082000		0	0	13137000		298210	13140210	13380210		298210	298210	13435210		8.93954e+06	4677210		0.523205	0.526543				Ubiquitin carboxyl-terminal hydrolase	Usp9y
57130000	0	37868000		0	12929000	36426000		57428210	298210	38166210		298210	13227210	36724210		31964210	1.67499e+07		0.52402	0.48678					Srp54c
27628000	15748000	30031000		10886000	11854000	15324000		27926210	16046210	30329210		11184210	12152210	15622210		24767210	12986210		0.524331	0.0631689				Serine/threonine-protein kinase VRK2	Vrk2
0	29943000	34585000		0	0	33436000		298210	30241210	34883210		298210	298210	33734210		2.18075e+07	1.14435e+07		0.524752	0.541469				Transcription factor Sp3	Sp3
76559000	86749000	75350000		79643000	24788000	21799000		76857210	87047210	75648210		79941210	25086210	22097210		7.98509e+07	4.23749e+07		0.530675	0.121939					Nfu1
21281000	16157000	26927000		24503000	9277400	0		21579210	16455210	27225210		24801210	9575610	298210		21753210	1.15583e+07		0.53134	0.260776				DENN domain-containing protein 1A	Dennd1a
188440000	374620000	196110000		180490000	123470000	99130000		188738210	374918210	196408210		180788210	123768210	99428210		2.53355e+08	1.34662e+08		0.531514	0.143851				Glycosaminoglycan xylosylkinase	Fam20b
70300000	24357000	114220000		0	49603000	61017000		70598210	24655210	114518210		298210	49901210	61315210		6.99239e+07	3.71715e+07		0.5316	0.363889				Glycolipid transfer protein	Gltp
5757100000	6063200000	6397100000		2770900000	3594000000	3322000000		5757398210	6063498210	6397398210		2771198210	3594298210	3322298210		6.07276e+09	3.22926e+09		0.531762	0.000732995				Aldehyde dehydrogenase, cytosolic 1	Aldh1a7
535060000	276130000	336630000		309560000	72122000	228920000		535358210	276428210	336928210		309858210	72420210	229218210		3.82905e+08	203832210		0.532331	0.162563				Lysosomal thioesterase PPT2	Ppt2
0	14908000	12520000		0	14186000	0		298210	15206210	12818210		298210	14484210	298210		9.44088e+06	5.02688e+06		0.532459	0.541009				GRIP and coiled-coil domain-containing protein 1	Gcc1
462680000	91339000	111700000		126840000	122990000	104450000		462978210	91637210	111998210		127138210	123288210	104748210		2.22205e+08	1.18392e+08		0.532804	0.438334				Mitochondrial inner membrane protein OXA1L	Oxa1l
99753000	109750000	145280000		20032000	19601000	149230000		100051210	110048210	145578210		20330210	19899210	149528210		118559210	6.32525e+07		0.53351	0.289131				AKT-interacting protein	Aktip
79301000	73462000	100690000		0	81559000	53254000		79599210	73760210	100988210		298210	81857210	53552210		8.47825e+07	4.52359e+07		0.533552	0.193071				Apoptosis-inducing factor 2	Aifm2
8242100000	7062300000	6437700000		3399700000	4460100000	3790000000		8242398210	7062598210	6437998210		3399998210	4460398210	3790298210		7.24766e+09	3.88356e+09		0.535837	0.00537037				3 beta-hydroxysteroid dehydrogenase/Delta 5-->4-isomerase type 1;3-beta-hydroxy-Delta(5)-steroid dehydrogenase;Steroid Delta-isomerase	Hsd3b1
94259000	71544000	26762000		102840000	0	0		94557210	71842210	27060210		103138210	298210	298210		6.44865e+07	34578210		0.536208	0.492144				Single-strand selective monofunctional uracil DNA glycosylase	Smug1
25975000	11487000	31270000		19471000	9012600	7986200		26273210	11785210	31568210		19769210	9310810	8284410		2.32089e+07	12454810		0.53664	0.197142					Cyp4f13;Cyp4f16;Cyp4f39;Cyp4f37
93257000	78620000	108310000		51070000	68046000	31241000		93555210	78918210	108608210		51368210	68344210	31539210		9.36939e+07	50417210		0.538106	0.0339122					Vdac2
44751000	23644000	37264000		19350000	14101000	23021000		45049210	23942210	37562210		19648210	14399210	23319210		3.55179e+07	19122210		0.538383	0.070623				CDK2-associated and cullin domain-containing protein 1	Cacul1
19405000000	19525000000	20520000000		6621100000	14403000000	11078000000		19405298210	19525298210	20520298210		6621398210	14403298210	11078298210		1.9817e+10	10700998210		0.539992	0.0161981				Cholesterol side-chain cleavage enzyme, mitochondrial	Cyp11a1
59707000	42615000	23438000		0	31724000	35790000		60005210	42913210	23736210		298210	32022210	36088210		42218210	2.28029e+07		0.540119	0.276425				Protein FAM187B	Fam187b
205450000	154350000	168080000		65733000	77270000	142110000		205748210	154648210	168378210		66031210	77568210	142408210		176258210	9.53359e+07		0.540888	0.0457298				Leucine-rich repeat protein SHOC-2	Shoc2
31276000	42975000	39681000		26997000	34243000	0		31574210	43273210	39979210		27295210	34541210	298210		3.82755e+07	2.07115e+07		0.541117	0.185105				Inositol 1,4,5-trisphosphate receptor type 2	Itpr2
68568000	75198000	77676000		67770000	0	51679000		68866210	75496210	77974210		68068210	298210	51977210		74112210	4.01145e+07		0.541268	0.174587				Complement C1q tumor necrosis factor-related protein 6	C1qtnf6
48521000	19586000	18880000		4985600	9914900	31882000		48819210	19884210	19178210		5283810	10213110	32180210		2.92939e+07	1.58924e+07		0.542515	0.354013					Syna
62381000	150840000	88498000		49520000	55886000	58030000		62679210	151138210	88796210		49818210	56184210	58328210		100871210	5.47769e+07		0.543038	0.15531				Biogenesis of lysosome-related organelles complex 1 subunit 1	Bloc1s1
277960000	246660000	285830000		178900000	122080000	138740000		278258210	246958210	286128210		179198210	122378210	139038210		270448210	1.46872e+08		0.543067	0.00393787				39S ribosomal protein L10, mitochondrial	Mrpl10
961620000	753710000	968790000		359280000	184270000	914500000		961918210	754008210	969088210		359578210	184568210	914798210		8.95005e+08	4.86315e+08		0.543366	0.151768				Uncharacterized protein C10orf88 homolog
326290000	303620000	264780000		121600000	208770000	155590000		326588210	303918210	265078210		121898210	209068210	155888210		298528210	1.62285e+08		0.543617	0.011842				Delta(24)-sterol reductase	Dhcr24
0	32489000	30222000		0	0	33775000		298210	32787210	30520210		298210	298210	34073210		2.12019e+07	1.15565e+07		0.545072	0.56449				Growth factor receptor-bound protein 10	Grb10
36413000	69289000	15754000		14844000	13146000	37852000		36711210	69587210	16052210		15142210	13444210	38150210		4.07835e+07	2.22455e+07		0.545454	0.349331				Probable ATP-dependent RNA helicase DDX58	Ddx58
295810000	85947000	397400000		59330000	267270000	98491000		296108210	86245210	397698210		59628210	267568210	98789210		260017210	141995210		0.546099	0.350323				Nesprin-1	Syne1
64543000	60436000	36181000		45322000	0	42516000		64841210	60734210	36479210		45620210	298210	42814210		54018210	2.95775e+07		0.547548	0.226707				Guanylate cyclase soluble subunit beta-1	Gucy1b3
829420000	564240000	580300000		313170000	371940000	395630000		829718210	564538210	580598210		313468210	372238210	395928210		6.58285e+08	3.60545e+08		0.547703	0.0289659				ATP synthase subunit a	mt-Atp6;Mtatp6
56099000	14229000	10387000		22292000	8247000	13265000		56397210	14527210	10685210		22590210	8545210	13563210		27203210	1.48995e+07		0.547713	0.463788				Cyclin-dependent kinase 2-associated protein 1;Cyclin-dependent kinase 2-associated protein 2	Cdk2ap1;Cdk2ap2
22449000	0	0		11892000	0	0		22747210	298210	298210		12190210	298210	298210		7781210	4262210		0.547757	0.699057				GATS-like protein 3;GATS-like protein 2	Gatsl3;Gatsl2
11734000	23485000	20660000		18431000	0	11843000		12032210	23783210	20958210		18729210	298210	12141210		1.89245e+07	1.03895e+07		0.548998	0.256388				Mitogen-activated protein kinase kinase kinase 7	Map3k7
402050000	177630000	107110000		0	0	377130000		402348210	177928210	107408210		298210	298210	377428210		229228210	126008210		0.549706	0.539354					Bscl2
178030000	89170000	155060000		106580000	0	125700000		178328210	89468210	155358210		106878210	298210	125998210		1.41052e+08	7.77249e+07		0.551039	0.251745				Guanine deaminase	Gda
354900000	434480000	73564000		248360000	153860000	73130000		355198210	434778210	73862210		248658210	154158210	73428210		287946210	158748210		0.551312	0.344453				Leukemia inhibitory factor receptor	Lifr
38703000	36867000	27605000		17173000	18195000	21429000		39001210	37165210	27903210		17471210	18493210	21727210		3.46899e+07	1.92305e+07		0.554356	0.0135131				mRNA-decapping enzyme 1B	Dcp1b
136490000	128930000	127920000		0	104690000	113110000		136788210	129228210	128218210		298210	104988210	113408210		1.31412e+08	72898210		0.554732	0.183999				Dipeptidyl peptidase 1;Dipeptidyl peptidase 1 exclusion domain chain;Dipeptidyl peptidase 1 heavy chain;Dipeptidyl peptidase 1 light chain	Ctsc
307830000	171520000	137840000		109300000	147070000	86954000		308128210	171818210	138138210		109598210	147368210	87252210		206028210	1.1474e+08		0.556912	0.171371				Protein O-linked-mannose beta-1,2-N-acetylglucosaminyltransferase 1	Pomgnt1
1512700000	225110000	276370000		212270000	728890000	181660000		1512998210	225408210	276668210		212568210	729188210	181958210		6.71692e+08	3.74572e+08		0.557654	0.550896				Keratin, type I cytoskeletal 14;Keratin, type I cytoskeletal 42	Krt14;Krt42
29974000000	29110000000	40868000000		13615000000	20543000000	21652000000		29974298210	29110298210	40868298210		13615298210	20543298210	21652298210		3.33176e+10	1.86036e+10		0.558372	0.0317088				Hydroxymethylglutaryl-CoA synthase, mitochondrial	Hmgcs2
188390000	163170000	166440000		105660000	63882000	119390000		188688210	163468210	166738210		105958210	64180210	119688210		1.72965e+08	9.66089e+07		0.558546	0.0144583				Torsin-2A;Prosalusin;Salusin-beta	Tor2a
133050000	77356000	93171000		57322000	59069000	52933000		133348210	77654210	93469210		57620210	59367210	53231210		1.01491e+08	5.67395e+07		0.559062	0.0549733				39S ribosomal protein L48, mitochondrial	Mrpl48
200250000	169730000	115650000		71080000	99871000	100570000		200548210	170028210	115948210		71378210	100169210	100868210		1.62175e+08	90805210		0.559922	0.0549098				Placenta-specific gene 8 protein	Plac8
89621000	66548000	58528000		0	64814000	55021000		89919210	66846210	58826210		298210	65112210	55319210		7.18639e+07	40243210		0.559992	0.22781					Tmbim7
18513000	18979000	22535000		0	15816000	17429000		18811210	19277210	22833210		298210	16114210	17727210		20307210	1.13799e+07		0.560386	0.192586				Methyltransferase-like protein 2	Mettl2
56598000	84244000	74100000		40122000	31419000	48588000		56896210	84542210	74398210		40420210	31717210	48886210		7.19455e+07	40341210		0.560719	0.0289486				Receptor-type tyrosine-protein phosphatase epsilon	Ptpre
94138000	93692000	110320000		61150000	33124000	72569000		94436210	93990210	110618210		61448210	33422210	72867210		9.96815e+07	5.59125e+07		0.560912	0.0276695				Nucleoredoxin-like protein 2	Nxnl2
318660000	99708000	106100000		91496000	91421000	110980000		318958210	100006210	106398210		91794210	91719210	111278210		1.75121e+08	9.82639e+07		0.56112	0.347307				60S ribosome subunit biogenesis protein NIP7 homolog	Nip7
177650000	92364000	63615000		56369000	58256000	72446000		177948210	92662210	63913210		56667210	58554210	72744210		1.11508e+08	62655210		0.56189	0.23099				ATP synthase mitochondrial F1 complex assembly factor 2	Atpaf2
18727000	17557000	14946000		11685000	16714000	0		19025210	17855210	15244210		11983210	17012210	298210		1.73749e+07	9.76454e+06		0.561992	0.208132				MICOS complex subunit Mic60	Immt
14385000000	9419700000	11251000000		4776000000	7789300000	7141600000		14385298210	9419998210	11251298210		4776298210	7789598210	7141898210		1.16855e+10	6.56926e+09		0.562171	0.0405894				Fatty acid-binding protein, heart	Fabp3
81413000	82888000	76456000		0	67457000	67860000		81711210	83186210	76754210		298210	67755210	68158210		8.05505e+07	4.54039e+07		0.563669	0.195467				Probable carboxypeptidase PM20D1	Pm20d1
128170000	145930000	234710000		0	145750000	142360000		128468210	146228210	235008210		298210	146048210	142658210		1.69902e+08	9.63349e+07		0.567004	0.275192				EH domain-binding protein 1-like protein 1	Ehbp1l1
19777000	5384000	20916000		2663000	0	23102000		20075210	5682210	21214210		2961210	298210	23400210		15657210	8.88654e+06		0.567569	0.486662					Tm6sf1
993660000	903990000	484290000		344910000	339330000	670180000		993958210	904288210	484588210		345208210	339628210	670478210		794278210	4.51772e+08		0.568782	0.14793				U6 snRNA-associated Sm-like protein LSm7	Lsm7
4647500000	4381800000	4969700000		2069700000	2668800000	3228800000		4647798210	4382098210	4969998210		2069998210	2669098210	3229098210		4.66663e+09	2.65606e+09		0.569161	0.00586038				Fatty acid desaturase 2	Fads2
38468000	50650000	39589000		26510000	28035000	18482000		38766210	50948210	39887210		26808210	28333210	18780210		4.32005e+07	2.46405e+07		0.570376	0.0191501				Beta-defensin 36	Defb36
451990000	515980000	561270000		268220000	305040000	299410000		452288210	516278210	561568210		268518210	305338210	299708210		5.10045e+08	291188210		0.570907	0.00290102				Beta-galactosidase	Glb1
44882000	10431000	51400000		0	15354000	45537000		45180210	10729210	51698210		298210	15652210	45835210		35869210	20595210		0.574175	0.454315				Cytoplasmic dynein 1 intermediate chain 1	Dync1i1
11045000	28445000	35328000		11445000	13249000	17893000		11343210	28743210	35626210		11743210	13547210	18191210		2.52375e+07	1.44939e+07		0.574298	0.224089				Monocyte to macrophage differentiation factor 2	Mmd2
445770000	410490000	401950000		222070000	226010000	275120000		446068210	410788210	402248210		222368210	226308210	275418210		4.19702e+08	2.41365e+08		0.575087	0.00119581				Uncharacterized protein C20orf194 homolog	4930402H24Rik
64656000	27732000	128290000		22686000	46878000	56985000		64954210	28030210	128588210		22984210	47176210	57283210		7.38575e+07	42481210		0.575178	0.36984				Thioredoxin, mitochondrial	Txn2
900560000	1032100000	1042900000		443610000	618210000	649540000		900858210	1032398210	1043198210		443908210	618508210	649838210		9.92152e+08	5.70752e+08		0.575266	0.00587425				Ras GTPase-activating-like protein IQGAP2	Iqgap2
2471600000	2885100000	2527800000		1289600000	1832500000	1413800000		2471898210	2885398210	2528098210		1289898210	1832798210	1414098210		2.62846e+09	1.51226e+09		0.575341	0.00593643					Ogdhl
2267000000	1880100000	2224400000		951360000	1275700000	1440500000		2267298210	1880398210	2224698210		951658210	1275998210	1440798210		2.12413e+09	1222818210		0.575679	0.00881587				Lanosterol 14-alpha demethylase	Cyp51a1
922160000	925090000	980590000		18027000	767790000	842300000		922458210	925388210	980888210		18325210	768088210	842598210		9.42912e+08	5.43004e+08		0.57588	0.204263				Succinate dehydrogenase [ubiquinone] cytochrome b small subunit, mitochondrial	Sdhd
1306300000	1901400000	1490900000		677520000	903820000	1124300000		1306598210	1901698210	1491198210		677818210	904118210	1124598210		1566498210	902178210		0.57592	0.0381761				Reticulocalbin-1	Rcn1
11253000	0	15935000		0	0	15284000		11551210	298210	16233210		298210	298210	15582210		9.36088e+06	5.39288e+06		0.576108	0.598636				Isoprenoid synthase domain-containing protein	Ispd
196660000	257600000	304770000		120790000	131380000	184810000		196958210	257898210	305068210		121088210	131678210	185108210		253308210	145958210		0.576208	0.0441881				Angiotensinogen;Angiotensin-1;Angiotensin-2;Angiotensin-3;Angiotensin-4;Angiotensin 1-9;Angiotensin 1-7;Angiotensin 1-5;Angiotensin 1-4	Agt
40211000	31078000	27915000		33153000	23637000	0		40509210	31376210	28213210		33451210	23935210	298210		33366210	19228210		0.576278	0.250234				AN1-type zinc finger protein 6	Zfand6
95410000	109870000	123680000		61582000	44712000	83002000		95708210	110168210	123978210		61880210	45010210	83300210		1.09952e+08	6.33969e+07		0.576589	0.0277059				Protein phosphatase 1F	Ppm1f
183240000	203420000	258470000		196270000	55474000	120000000		183538210	203718210	258768210		196568210	55772210	120298210		2.15342e+08	1.24213e+08		0.576818	0.121522				ATP-binding cassette sub-family B member 10, mitochondrial	Abcb10
57037000	106460000	53351000		74239000	45322000	5495400		57335210	106758210	53649210		74537210	45620210	5793610		7.25809e+07	4.19837e+07		0.57844	0.308906				Probable palmitoyltransferase ZDHHC12	Zdhhc12
14163000	0	19665000		0	19209000	0		14461210	298210	19963210		298210	19507210	298210		11574210	6701210		0.578978	0.604404				39S ribosomal protein L42, mitochondrial	Mrpl42
718710000	605160000	601990000		224160000	423650000	468110000		719008210	605458210	602288210		224458210	423948210	468408210		6.42252e+08	3.72272e+08		0.579635	0.032778				Epidermal growth factor receptor	Egfr
442020000	526900000	382540000		378660000	377810000	26723000		442318210	527198210	382838210		378958210	378108210	27021210		4.50785e+08	2.61363e+08		0.579794	0.202597				DNA polymerase epsilon subunit 3	Pole3
410810000	315590000	302960000		247050000	250750000	100210000		411108210	315888210	303258210		247348210	251048210	100508210		343418210	1.99635e+08		0.581317	0.0750915				Phosphatidylglycerophosphatase and protein-tyrosine phosphatase 1	Ptpmt1
278880000	238470000	197850000		99735000	146510000	171530000		279178210	238768210	198148210		100033210	146808210	171828210		238698210	1.39557e+08		0.584657	0.0344751				Transmembrane protein 175	Tmem175
19328000	26854000	43961000		33731000	14275000	4559500		19626210	27152210	44259210		34029210	14573210	4857710		3.03459e+07	1.782e+07		0.587231	0.3281				Nuclear respiratory factor 1	Nrf1
275040000	358630000	393220000		174110000	222850000	205730000		275338210	358928210	393518210		174408210	223148210	206028210		3.42595e+08	2.01195e+08		0.587268	0.0202349				Sulfide:quinone oxidoreductase, mitochondrial	Sqrdl
129530000	169080000	158500000		78992000	97660000	91472000		129828210	169378210	158798210		79290210	97958210	91770210		152668210	8.96729e+07		0.587371	0.00844193				Dol-P-Man:Man(5)GlcNAc(2)-PP-Dol alpha-1,3-mannosyltransferase	Alg3
105320000	130650000	129070000		90631000	31428000	92483000		105618210	130948210	129368210		90929210	31726210	92781210		121978210	71812210		0.58873	0.0814816				Alpha-(1,3)-fucosyltransferase 11	Fut11
91889000	139990000	131830000		79490000	88912000	45369000		92187210	140288210	132128210		79788210	89210210	45667210		1.21535e+08	71555210		0.588764	0.0659055				Hamartin	Tsc1
857110000	820810000	613640000		328580000	679070000	343690000		857408210	821108210	613938210		328878210	679368210	343988210		7.64152e+08	4.50745e+08		0.589863	0.0844593				Adrenodoxin, mitochondrial	Fdx1
145970000	140290000	4021000000		2109000000	304670000	126880000		146268210	140588210	4021298210		2109298210	304968210	127178210		1.43605e+09	847148210		0.589915	0.703395
34628000	32380000	31293000		27375000	30309000	0		34926210	32678210	31591210		27673210	30607210	298210		33065210	19526210		0.590536	0.235316				Zinc finger protein 608	Znf608
52991000	36534000	51237000		0	82813000	0		53289210	36832210	51535210		298210	83111210	298210		4.72189e+07	2.79025e+07		0.590919	0.529511				Lysozyme-like protein 1	Lyzl1
56906000	37615000	74273000		35772000	12585000	51137000		57204210	37913210	74571210		36070210	12883210	51435210		5.65629e+07	3.34629e+07		0.591605	0.208374				GTP-binding protein Rit1	Rit1
1803200000	3007000000	1657300000		1008200000	2048000000	772080000		1803498210	3007298210	1657598210		1008498210	2048298210	772378210		2.15613e+09	1.27639e+09		0.591982	0.203969				Disheveled-associated activator of morphogenesis 2	Daam2
19263000	21216000	25356000		16860000	21758000	0		19561210	21514210	25654210		17158210	22056210	298210		22243210	1.31709e+07		0.59213	0.25481				Molybdopterin synthase sulfur carrier subunit	Mocs2
23716000	8889200	22719000		8592300	12486000	11316000		24014210	9187410	23017210		8890510	12784210	11614210		18739610	11096310		0.592131	0.195396					Bptf
144270000	110210000	46681000		75979000	52590000	49556000		144568210	110508210	46979210		76277210	52888210	49854210		100685210	59673210		0.592671	0.240638				Pumilio homolog 2	Pum2
76788000	77200000	126110000		62509000	0	103270000		77086210	77498210	126408210		62807210	298210	103568210		93664210	5.55579e+07		0.59316	0.327667					Tpd52l2
159450000	147850000	155150000		130770000	143810000	0		159748210	148148210	155448210		131068210	144108210	298210		154448210	9.18249e+07		0.594535	0.2454				Iron-sulfur cluster assembly enzyme ISCU, mitochondrial	Iscu
0	0	31735000		4540500	14008000	0		298210	298210	32033210		4838710	14306210	298210		1.08765e+07	6.48104e+06		0.595873	0.718388				Vascular cell adhesion protein 1	Vcam1
391780000	233530000	305000000		194580000	152410000	207340000		392078210	233828210	305298210		194878210	152708210	207638210		3.10402e+08	1.85075e+08		0.596243	0.0616549				Calcium uptake protein 2, mitochondrial	Micu2
30212000	0	14574000		9887600	0	16506000		30510210	298210	14872210		10185810	298210	16804210		1.52269e+07	9.09608e+06		0.59737	0.571298				G patch domain-containing protein 8	Gpatch8
45351000	0	160910000		0	103860000	19055000		45649210	298210	161208210		298210	104158210	19353210		6.90519e+07	4.12699e+07		0.597665	0.654582				Chromosome transmission fidelity protein 18 homolog	Chtf18
151670000	88633000	88125000		76387000	47059000	72645000		151968210	88931210	88423210		76685210	47357210	72943210		109774210	6.56619e+07		0.598154	0.127852				Protein FAM160B2	Fam160b2
488690000	483950000	486540000		358190000	133400000	381600000		488988210	484248210	486838210		358488210	133698210	381898210		4.86692e+08	2.91362e+08		0.598658	0.0690663				Peroxisomal membrane protein 11A	Pex11a
19324000	20370000	21452000		17081000	0	19206000		19622210	20668210	21750210		17379210	298210	19504210		20680210	1.23939e+07		0.599311	0.24653				Uncharacterized protein KIAA0556	D430042O09Rik;Kiaa0556
5039200	23233000	18908000		12423000	15512000	0		5337410	23531210	19206210		12721210	15810210	298210		1.60249e+07	9.60988e+06		0.599682	0.426326				Mitochondrial coenzyme A transporter SLC25A42	Slc25a42
39254000	54123000	33338000		11995000	12152000	51529000		39552210	54421210	33636210		12293210	12450210	51827210		4.25365e+07	2.55235e+07		0.600038	0.306717				Bone marrow stromal antigen 2	Bst2
44106000	62071000	52633000		35296000	23020000	36890000		44404210	62369210	52931210		35594210	23318210	37188210		5.32349e+07	3.20335e+07		0.60174	0.0354606				Exostosin-like 2	Extl2
33208000	53636000	38136000		32538000	42320000	0		33506210	53934210	38434210		32836210	42618210	298210		41958210	2.52509e+07		0.60181	0.304471				CGG triplet repeat-binding protein 1	Cggbp1
39412000	45747000	34418000		23435000	28548000	19639000		39710210	46045210	34716210		23733210	28846210	19937210		40157210	24172210		0.601939	0.0185982				Pirin	Pir
220970000	130780000	242380000		73618000	80662000	203390000		221268210	131078210	242678210		73916210	80960210	203688210		1.98342e+08	1.19522e+08		0.602605	0.219995				Transient receptor potential cation channel subfamily M member 5	Trpm5
0	22588000	22391000		0	11754000	15011000		298210	22886210	22689210		298210	12052210	15309210		15291210	9.21988e+06		0.602953	0.527028				Retinoic acid receptor RXR-beta;Retinoic acid receptor RXR-gamma;Retinoic acid receptor RXR-alpha	Rxrb;Rxrg;Rxra
1609400000	1338500000	1347500000		762520000	910910000	917450000		1609698210	1338798210	1347798210		762818210	911208210	917748210		1432098210	8.63925e+08		0.603258	0.00513106				7-dehydrocholesterol reductase	Dhcr7
47502000	26906000	37031000		25447000	0	41512000		47800210	27204210	37329210		25745210	298210	41810210		3.74445e+07	2.26179e+07		0.604037	0.33276				Uncharacterized protein C17orf80 homolog	D11Wsu47e
56308000	47865000	44264000		44800000	44647000	0		56606210	48163210	44562210		45098210	44945210	298210		49777210	3.01139e+07		0.604973	0.26887				E3 ubiquitin-protein ligase makorin-1	Mkrn1
802940000	52245000	114790000		181930000	233940000	170780000		803238210	52543210	115088210		182228210	234238210	171078210		323623210	195848210		0.605174	0.624428				SLIT-ROBO Rho GTPase-activating protein 3	Srgap3
80970000	54386000	43608000		23937000	42173000	41894000		81268210	54684210	43906210		24235210	42471210	42192210		5.99529e+07	3.62995e+07		0.605468	0.134527				Dynein intermediate chain 2, axonemal	Dnaic2;Dnai2	pcd	oad ic
1755400000	2311600000	1994400000		1882200000	863790000	932890000		1755698210	2311898210	1994698210		1882498210	864088210	933188210		2.02076e+09	1.22659e+09		0.606994	0.095776				Ferritin;Ferritin light chain 1;Ferritin light chain 2	Ftl1;Ftl2
0	14358000	14882000		0	0	17401000		298210	14656210	15180210		298210	298210	17699210		1.00449e+07	6.09854e+06		0.60713	0.630002				NAD kinase	Nadk
21317000	17618000	15276000		17738000	0	14839000		21615210	17916210	15574210		18036210	298210	15137210		1.83685e+07	11157210		0.607409	0.279378				Epidermal growth factor receptor substrate 15-like 1	Eps15l1
504400000	424230000	577090000		278370000	321980000	315990000		504698210	424528210	577388210		278668210	322278210	316288210		5.02205e+08	3.05745e+08		0.608805	0.0131391				Solute carrier family 25 member 35	Slc25a35
288450000	203480000	437600000		260160000	25859000	280220000		288748210	203778210	437898210		260458210	26157210	280518210		3.10142e+08	1.89045e+08		0.609543	0.319127				tRNA (guanine(10)-N2)-methyltransferase homolog	Trmt11
38339000	49985000	56980000		0	32613000	55612000		38637210	50283210	57278210		298210	32911210	55910210		4.87329e+07	2.97065e+07		0.609579	0.326347					Xlr5b;Xlr5c;Xlr5a
79399000	36129000	40972000		33563000	22050000	39488000		79697210	36427210	41270210		33861210	22348210	39786210		5.24649e+07	3.19985e+07		0.609904	0.233967				Bloom syndrome protein homolog	Blm
114580000	87155000	144900000		70042000	53311000	87772000		114878210	87453210	145198210		70340210	53609210	88070210		115843210	70673210		0.610076	0.0805982				Chloride channel protein;Chloride channel protein 2	Clcn2
28106000	29478000	27691000		24243000	0	27484000		28404210	29776210	27989210		24541210	298210	27782210		28723210	1.75405e+07		0.610675	0.267505				Telomerase Cajal body protein 1	Wrap53
0	18438000	28599000		19551000	8836700	0		298210	18736210	28897210		19849210	9134910	298210		15977210	9.76078e+06		0.610919	0.571532				ATP-binding cassette sub-family G member 2	Abcg2
1765300000	349580000	539890000		194590000	674610000	752840000		1765598210	349878210	540188210		194888210	674908210	753138210		8.85222e+08	540978210		0.611122	0.510166				Mitochondrial import inner membrane translocase subunit TIM16	Pam16
175900000	92013000	0		0	93779000	69715000		176198210	92311210	298210		298210	94077210	70013210		8.96025e+07	54796210		0.611547	0.581152				ADP-ribosylation factor 2	Arf2
117070000	51174000	95844000		52831000	43555000	64911000		117368210	51472210	96142210		53129210	43853210	65209210		8.83275e+07	5.40639e+07		0.612084	0.168012				Coagulation factor XII;Coagulation factor XIIa heavy chain;Coagulation factor XIIa light chain	F12
192810000	150730000	177290000		72509000	98525000	147630000		193108210	151028210	177588210		72807210	98823210	147928210		173908210	1.0652e+08		0.612504	0.0556844				Rab11 family-interacting protein 3	Rab11fip3
508290000	263650000	257930000		329750000	41028000	259820000		508588210	263948210	258228210		330048210	41326210	260118210		343588210	2.10498e+08		0.612645	0.329154				Pantetheinase	Vnn1
207910000	206100000	243910000		119670000	165580000	117560000		208208210	206398210	244208210		119968210	165878210	117858210		2.19605e+08	134568210		0.612774	0.0129751				F-box only protein 36	Fbxo36
351690000	167990000	191110000		103700000	117760000	213780000		351988210	168288210	191408210		103998210	118058210	214078210		237228210	145378210		0.61282	0.244229				Long-chain fatty acid transport protein 3	Slc27a3
528480000	367640000	618770000		344980000	538100000	44949000		528778210	367938210	619068210		345278210	538398210	45247210		5.05262e+08	309641210		0.612834	0.291622				Pyridine nucleotide-disulfide oxidoreductase domain-containing protein 2	Pyroxd2
82441000	96788000	123870000		51280000	69456000	64931000		82739210	97086210	124168210		51578210	69754210	65229210		101331210	62187210		0.613702	0.0424273				Consortin	Cnst
209280000	201140000	224630000		166810000	117700000	105280000		209578210	201438210	224928210		167108210	117998210	105578210		2.11982e+08	130228210		0.614337	0.0150235				Microsomal triglyceride transfer protein large subunit	Mttp
269500000	271170000	224350000		102070000	132990000	234590000		269798210	271468210	224648210		102368210	133288210	234888210		2.55305e+08	156848210		0.614356	0.0832231				Snurportin-1	Snupn
162820000	215190000	367980000		259580000	198550000	0		163118210	215488210	368278210		259878210	198848210	298210		2.48962e+08	153008210		0.614586	0.390081				Complement C4-B;Complement C4 beta chain;Complement C4 alpha chain;C4a anaphylatoxin;Complement C4 gamma chain	C4b
81940000	94395000	120540000		55039000	61585000	65617000		82238210	94693210	120838210		55337210	61883210	65915210		9.92565e+07	61045210		0.615025	0.0315971				Feline leukemia virus subgroup C receptor-related protein 2	Flvcr2
1550500000	1410900000	1665200000		745760000	1083900000	1016200000		1550798210	1411198210	1665498210		746058210	1084198210	1016498210		1542498210	948918210		0.615183	0.00943704				Phospholipase D3	Pld3
14303000	22025000	30108000		14817000	25761000	0		14601210	22323210	30406210		15115210	26059210	298210		2.24435e+07	13824210		0.615955	0.380295				Probable ATP-dependent RNA helicase DDX59	Ddx59
42491000	49509000	47149000		0	37791000	47598000		42789210	49807210	47447210		298210	38089210	47896210		46681210	28761210		0.61612	0.288557				tRNA-splicing endonuclease subunit Sen34	Tsen34
1228800000	833110000	921250000		642610000	690180000	505460000		1229098210	833408210	921548210		642908210	690478210	505758210		9.94685e+08	613048210		0.616324	0.0446105				Dynein heavy chain 2, axonemal	Dnah2	IAD 1β
81240000	101670000	88037000		81081000	9017400	76678000		81538210	101968210	88335210		81379210	9315610	76976210		9.06139e+07	5.58903e+07		0.616797	0.222807				Transcription initiation factor TFIID subunit 7-like	Taf7l
99084000	87327000	89726000		55206000	57228000	57559000		99382210	87625210	90024210		55504210	57526210	57857210		9.23439e+07	5.69625e+07		0.616852	0.000641505				Phospholemman	Fxyd1
115600000	151670000	140790000		71478000	40264000	139810000		115898210	151968210	141088210		71776210	40562210	140108210		136318210	8.41489e+07		0.617297	0.170631				U8 snoRNA-decapping enzyme	Nudt16
167570000	188950000	301140000		141970000	131660000	132750000		167868210	189248210	301438210		142268210	131958210	133048210		219518210	135758210		0.618437	0.114039
28176000	41060000	34795000		0	25547000	38465000		28474210	41358210	35093210		298210	25845210	38763210		34975210	2.16355e+07		0.618597	0.324976				AMMECR1-like protein	Ammecr1l
433090000	671010000	527210000		334950000	268120000	408770000		433388210	671308210	527508210		335248210	268418210	409068210		544068210	337578210		0.62047	0.061719				Lysosomal acid phosphatase	Acp2
203040000	189180000	144190000		86256000	230490000	16354000		203338210	189478210	144488210		86554210	230788210	16652210		1.79102e+08	1.11332e+08		0.621611	0.359276				Zinc finger MYND domain-containing protein 15	Zmynd15
164360000	124780000	128180000		86151000	91962000	81190000		164658210	125078210	128478210		86449210	92260210	81488210		1.39405e+08	8.67325e+07		0.622163	0.0156199					Hsf2bp
0	11027000	5071300		8305400	1379600	0		298210	11325210	5369510		8603610	1677810	298210		5664310	3.52654e+06		0.62259	0.6291				Calcium-transporting ATPase;Plasma membrane calcium-transporting ATPase 2	Atp2b3;Atp2b2
108610000	111490000	99292000		105950000	92767000	0		108908210	111788210	99590210		106248210	93065210	298210		106762210	66537210		0.623228	0.29659				Methyl-CpG-binding protein 2	Mecp2
66469000	90708000	37007000		22554000	47637000	50615000		66767210	91006210	37305210		22852210	47935210	50913210		65026210	4.05669e+07		0.623854	0.243484				Keratin, type II cytoskeletal 72	Krt72
40548000	37739000	50110000		0	79774000	0		40846210	38037210	50408210		298210	80072210	298210		43097210	2.68895e+07		0.623928	0.578694				Ankyrin repeat domain-containing protein 45	Ankrd45
62592000	69235000	56957000		0	59186000	58343000		62890210	69533210	57255210		298210	59484210	58641210		63226210	3.94745e+07		0.624338	0.298779				BAG family molecular chaperone regulator 3	Bag3
52093000	179770000	56322000		37752000	81246000	61053000		52391210	180068210	56620210		38050210	81544210	61351210		9.63599e+07	60315210		0.625937	0.455982				Bardet-Biedl syndrome 4 protein homolog	Bbs4
0	45668000	11910000		11538000	0	24181000		298210	45966210	12208210		11836210	298210	24479210		1.94909e+07	1.22045e+07		0.626167	0.659898				Cell division control protein 42 homolog	Cdc42
67540000	0	0		0	0	41961000		67838210	298210	298210		298210	298210	42259210		2.28115e+07	14285210		0.626227	0.763794				Actin, gamma-enteric smooth muscle	Actg2
838160000	516500000	495300000		242210000	359220000	556840000		838458210	516798210	495598210		242508210	359518210	557138210		6.16952e+08	386388210		0.626286	0.184582				UV excision repair protein RAD23 homolog A	Rad23a
10980000	28663000	23251000		14810000	13182000	11085000		11278210	28961210	23549210		15108210	13480210	11383210		2.12629e+07	1.33239e+07		0.626626	0.211365				Nephrocystin-3	Nphp3
18352000	0	33066000		0	31886000	0		18650210	298210	33364210		298210	32184210	298210		1.74375e+07	1.09269e+07		0.626629	0.672488				Fibulin-1	Fbln1
144050000	153070000	78590000		93120000	0	142060000		144348210	153368210	78888210		93418210	298210	142358210		1.25535e+08	7.86915e+07		0.62685	0.382757				Pseudouridine-5-phosphatase	Hdhd1a;Hdhd1
70699000	92088000	78258000		53026000	50556000	47316000		70997210	92386210	78556210		53324210	50854210	47614210		8.06465e+07	5.05975e+07		0.627399	0.00973819				Dihydropyrimidine dehydrogenase [NADP(+)]	Dpyd
55569000	81684000	57843000		38948000	35734000	47500000		55867210	81982210	58141210		39246210	36032210	47798210		65330210	4.10255e+07		0.627972	0.0550754				Coiled-coil domain-containing protein 93	Ccdc93
388710000	388620000	310100000		158800000	261620000	262740000		389008210	388918210	310398210		159098210	261918210	263038210		3.62775e+08	228018210		0.628539	0.0357548				Lysophospholipase-like protein 1	Lyplal1
179830000	141310000	213530000		202420000	86868000	46580000		180128210	141608210	213828210		202718210	87166210	46878210		1.78522e+08	112254210		0.628799	0.264851				H-2 class I histocompatibility antigen, D-B alpha chain;H-2 class I histocompatibility antigen, L-D alpha chain	H2-D1;H2-L;H2-Q4
283640000	166570000	52791000		49122000	202630000	64205000		283938210	166868210	53089210		49420210	202928210	64503210		167965210	105617210		0.628804	0.492506				Protein SHQ1 homolog	Shq1
4215700000	4060600000	4331700000		2158900000	3110900000	2663000000		4215998210	4060898210	4331998210		2159198210	3111198210	2663298210		4.20296e+09	2.64456e+09		0.629214	0.00550838				Macrophage mannose receptor 1	Mrc1
385060000	321480000	277760000		180790000	257180000	181500000		385358210	321778210	278058210		181088210	257478210	181798210		328398210	206788210		0.629687	0.0388509				Mitochondrial import receptor subunit TOM34	Tomm34
90186000	80807000	0		0	42957000	64484000		90484210	81105210	298210		298210	43255210	64782210		5.72959e+07	3.61119e+07		0.63027	0.570618				DNA-directed RNA polymerase I subunit RPA49	Polr1e
4715200000	1289700000	1368800000		1440000000	2056800000	1151000000		4715498210	1289998210	1369098210		1440298210	2057098210	1151298210		2458198210	1.54956e+09		0.630366	0.477249
128920000	87108000	108830000		60659000	74989000	68905000		129218210	87406210	109128210		60957210	75287210	69203210		108584210	6.84825e+07		0.630686	0.0348151				Zinc finger FYVE domain-containing protein 26	Zfyve26
69222000	100570000	87513000		36292000	39796000	85923000		69520210	100868210	87811210		36590210	40094210	86221210		8.60665e+07	5.43019e+07		0.630929	0.159281				LIM domain and actin-binding protein 1	Lima1
27400000	38919000	37012000		0	31461000	33420000		27698210	39217210	37310210		298210	31759210	33718210		3.47419e+07	21925210		0.631089	0.323799				Lysophospholipid acyltransferase LPCAT4	Lpcat4
151610000	65112000	186100000		102530000	93542000	57880000		151908210	65410210	186398210		102828210	93840210	58178210		134572210	8.49489e+07		0.631251	0.266729				Bcl-2-like protein 13	Bcl2l13
1269900000	1282500000	1249000000		775370000	835720000	788730000		1270198210	1282798210	1249298210		775668210	836018210	789028210		1.26743e+09	800238210		0.631386	2.3022e-05				Peroxisomal acyl-coenzyme A oxidase 1	Acox1
171340000	129840000	110260000		110240000	72402000	77157000		171638210	130138210	110558210		110538210	72700210	77455210		1.37445e+08	8.68979e+07		0.632238	0.0792105				Protein SMG5	Smg5
71496000	73331000	85831000		46692000	38290000	60583000		71794210	73629210	86129210		46990210	38588210	60881210		77184210	4.88199e+07		0.632511	0.0230272				Intersectin-2	Itsn2
449640000	388640000	768340000		487940000	237000000	292020000		449938210	388938210	768638210		488238210	237298210	292318210		535838210	3.39285e+08		0.633185	0.233582				Titin	Ttn
234060000	165250000	262570000		137700000	148200000	132990000		234358210	165548210	262868210		137998210	148498210	133288210		2.20925e+08	139928210		0.633375	0.0502952				Putative hydroxypyruvate isomerase;Hydroxypyruvate isomerase	Hyi
8765000000	4734700000	4756400000		4070400000	3225100000	4293600000		8765298210	4734998210	4756698210		4070698210	3225398210	4293898210		6.08566e+09	3.86333e+09		0.634825	0.182296
45598000	29535000	23584000		21711000	19849000	20821000		45896210	29833210	23882210		22009210	20147210	21119210		3.32039e+07	2.10919e+07		0.635223	0.140228
32600000	73725000	66602000		39526000	32222000	37820000		32898210	74023210	66900210		39824210	32520210	38118210		5.79405e+07	3.68209e+07		0.635494	0.176385				Protein C9orf72 homolog	3110043O21Rik
165190000	258410000	282150000		192110000	207380000	49069000		165488210	258708210	282448210		192408210	207678210	49367210		235548210	1.49818e+08		0.636039	0.237502				Beta-2-microglobulin	B2m
568730000	619210000	837970000		498540000	302380000	488470000		569028210	619508210	838268210		498838210	302678210	488768210		6.75602e+08	4.30095e+08		0.63661	0.0783352				Protein kish;Protein kish-A	Tmem167;Tmem167a
301970000	315410000	334960000		232020000	71707000	302830000		302268210	315708210	335258210		232318210	72005210	303128210		3.17745e+08	2.02484e+08		0.637253	0.170317				Testis-expressed protein 19.2	Tex19.2
44414000	35211000	37071000		29830000	18381000	25905000		44712210	35509210	37369210		30128210	18679210	26203210		3.91969e+07	2.50035e+07		0.637896	0.0316384				Transporter;Sodium- and chloride-dependent neutral and basic amino acid transporter B(0+)	Slc6a14
107710000	31140000	104260000		27992000	90648000	36181000		108008210	31438210	104558210		28290210	90946210	36479210		8.13349e+07	51905210		0.638167	0.406854				Protein SMG8	Smg8
209240000	107930000	68490000		105960000	60136000	79725000		209538210	108228210	68788210		106258210	60434210	80023210		1.28852e+08	8.22385e+07		0.638243	0.348871					Sbf2
220490000	197910000	145250000		200440000	57089000	102110000		220788210	198208210	145548210		200738210	57387210	102408210		1.88182e+08	1.20178e+08		0.638627	0.228198				Transmembrane 9 superfamily member 1	Tm9sf1
2916300000	3052700000	2854600000		1973900000	1927300000	1735800000		2916598210	3052998210	2854898210		1974198210	1927598210	1736098210		2941498210	1879298210		0.638892	0.000341627				Unconventional myosin-VI	Myo6
423140000	543510000	375770000		500700000	165510000	191780000		423438210	543808210	376068210		500998210	165808210	192078210		4.47772e+08	2.86295e+08		0.639377	0.245114				Semaphorin-4B	Sema4b
1814000000	1869300000	1645400000		990770000	922870000	1494300000		1814298210	1869598210	1645698210		991068210	923168210	1494598210		1.77653e+09	1136278210		0.639605	0.0291663				Coagulation factor XIII A chain	F13a1
1088900000	786990000	843800000		499340000	567510000	674070000		1089198210	787288210	844098210		499638210	567808210	674368210		9.06862e+08	5.80605e+08		0.640235	0.0366612				Fatty acid desaturase 1	Fads1
405120000	342630000	379530000		237800000	259470000	224420000		405418210	342928210	379828210		238098210	259768210	224718210		376058210	2.40862e+08		0.64049	0.00289789				Lysosomal alpha-mannosidase	Man2b1
321520000	344480000	242980000		185120000	173850000	222940000		321818210	344778210	243278210		185418210	174148210	223238210		3.03292e+08	194268210		0.640533	0.0330729				N-acyl-aromatic-L-amino acid amidohydrolase (carboxylate-forming)	Acy3
34572000	163700000	142760000		0	102130000	116020000		34870210	163998210	143058210		298210	102428210	116318210		1.13976e+08	7.30149e+07		0.640619	0.491964				Eukaryotic translation initiation factor 4E-binding protein 1	Eif4ebp1
147510000	164020000	201250000		108720000	102010000	117990000		147808210	164318210	201548210		109018210	102308210	118288210		1.71225e+08	1.09872e+08		0.64168	0.020724				IgG receptor FcRn large subunit p51	Fcgrt
23964000	21223000	18534000		18318000	0	22277000		24262210	21521210	18832210		18616210	298210	22575210		2.15385e+07	1.38299e+07		0.642099	0.334939				LIM domain-containing protein ajuba	Ajuba
126710000	111260000	125090000		120260000	0	113110000		127008210	111558210	125388210		120558210	298210	113408210		121318210	78088210		0.643664	0.332618				Probable G-protein coupled receptor 128	Gpr128
30356000	95409000	57551000		40498000	48190000	29009000		30654210	95707210	57849210		40796210	48488210	29307210		6.14035e+07	3.95305e+07		0.643783	0.328447				NADH-ubiquinone oxidoreductase chain 4L	mt-Nd4l;Mtnd4l
4396000000	4655300000	5916000000		2905900000	3413400000	3318500000		4396298210	4655598210	5916298210		2906198210	3413698210	3318798210		4989398210	3212898210		0.643945	0.0229292				Glycerol-3-phosphate dehydrogenase [NAD(+)];Glycerol-3-phosphate dehydrogenase [NAD(+)], cytoplasmic	Gpd1
155260000	174190000	115720000		70549000	72978000	142900000		155558210	174488210	116018210		70847210	73276210	143198210		148688210	9.57739e+07		0.644126	0.145401				Heme oxygenase 1	Hmox1
26532000	39941000	27243000		29645000	30430000	0		26830210	40239210	27541210		29943210	30728210	298210		3.15369e+07	20323210		0.644427	0.362564				Calcium/calmodulin-dependent protein kinase type 1	Camk1
462870000	1051100000	1294500000		966880000	535970000	309000000		463168210	1051398210	1294798210		967178210	536268210	309298210		9.36455e+08	604248210		0.645251	0.348773				Acyl-CoA synthetase family member 2, mitochondrial	Acsf2
391530000	310070000	346320000		228420000	237000000	211100000		391828210	310368210	346618210		228718210	237298210	211398210		3.49605e+08	2.25805e+08		0.645886	0.00749417				39S ribosomal protein L23, mitochondrial	Mrpl23
304320000	270260000	342770000		220100000	182870000	189790000		304618210	270558210	343068210		220398210	183168210	190088210		3.06082e+08	1.97885e+08		0.64651	0.0105425				Cytochrome c oxidase subunit 7A1, mitochondrial	Cox7a1
2907000000	2141300000	2881800000		2073900000	1668400000	1392400000		2907298210	2141598210	2882098210		2074198210	1668698210	1392698210		2.64366e+09	1.71186e+09		0.647535	0.043497				Enoyl-CoA delta isomerase 1, mitochondrial	Eci1
258540000	143910000	230800000		119070000	167440000	123270000		258838210	144208210	231098210		119368210	167738210	123568210		2.11382e+08	1.36892e+08		0.647604	0.120338				Transmembrane protein 205	Tmem205
786880000	698210000	956860000		567700000	426830000	586990000		787178210	698508210	957158210		567998210	427128210	587288210		8.14282e+08	5.27472e+08		0.647775	0.0346186				Receptor expression-enhancing protein;Receptor expression-enhancing protein 5	Reep5
194180000	189640000	180760000		129640000	134690000	101880000		194478210	189938210	181058210		129938210	134988210	102178210		1.88492e+08	122368210		0.649197	0.00377263				6-phosphofructo-2-kinase/fructose-2,6-bisphosphatase 4;6-phosphofructo-2-kinase;Fructose-2,6-bisphosphatase	Pfkfb4
39212000	44649000	29043000		31686000	0	41307000		39510210	44947210	29341210		31984210	298210	41605210		3.79329e+07	24629210		0.649284	0.373468				WD repeat-containing protein 74	Wdr74
13806000	29790000	46614000		29306000	28960000	0		14104210	30088210	46912210		29604210	29258210	298210		30368210	19720210		0.64937	0.476384				Zinc finger protein 512	Znf512
73898000	101590000	105200000		51811000	42716000	87472000		74196210	101888210	105498210		52109210	43014210	87770210		9.38609e+07	6.09645e+07		0.64952	0.12281				Phosphatidylinositol 5-phosphate 4-kinase type-2 beta	Pip4k2b
160750000	200270000	117740000		133550000	107810000	69516000		161048210	200568210	118038210		133848210	108108210	69814210		1.59885e+08	1.03924e+08		0.64999	0.137826				FAD-linked sulfhydryl oxidase ALR	Gfer
209740000	181950000	161980000		104850000	142560000	112550000		210038210	182248210	162278210		105148210	142858210	112848210		1.84855e+08	1.20285e+08		0.650699	0.0230317				Neuronal membrane glycoprotein M6-b	Gpm6b
19572000	17621000	16095000		0	11678000	22694000		19870210	17919210	16393210		298210	11976210	22992210		1.80609e+07	1.17555e+07		0.650884	0.395374				DnaJ homolog subfamily B member 6	Dnajb6
1404500000	1580400000	1679000000		775060000	1197700000	1064200000		1404798210	1580698210	1679298210		775358210	1197998210	1064498210		1.55493e+09	1012618210		0.65123	0.0216567				Carbonyl reductase [NADPH] 2	Cbr2
69626000	46175000	44169000		41901000	27324000	34761000		69924210	46473210	44467210		42199210	27622210	35059210		5.36215e+07	34960210		0.651981	0.112186				Translational activator of cytochrome c oxidase 1	Taco1
45093000	100290000	61086000		28765000	40176000	65385000		45391210	100588210	61384210		29063210	40474210	65683210		69121210	4.50735e+07		0.652094	0.288064				Zinc-alpha-2-glycoprotein	Azgp1
136060000	188630000	90634000		80824000	67850000	121860000		136358210	188928210	90932210		81122210	68148210	122158210		1.3874e+08	90476210		0.65213	0.213537				Folliculin	Flcn
85432000	0	26724000		29920000	0	42924000		85730210	298210	27022210		30218210	298210	43222210		3.76835e+07	2.45795e+07		0.652262	0.66688				Solute carrier family 35 member B1	Slc35b1
40803000	42251000	39746000		20895000	26961000	31968000		41101210	42549210	40044210		21193210	27259210	32266210		4.12315e+07	26906210		0.652564	0.0120251				Magnesium transporter MRS2 homolog, mitochondrial	Mrs2
1243100000	1323700000	984380000		1034400000	621700000	661090000		1243398210	1323998210	984678210		1034698210	621998210	661388210		1.18402e+09	7.72695e+08		0.6526	0.0690605				2-oxoisovalerate dehydrogenase subunit alpha, mitochondrial	Bckdha
217180000	204860000	276240000		133300000	171990000	150210000		217478210	205158210	276538210		133598210	172288210	150508210		233058210	1.52132e+08		0.652762	0.0306502				cAMP and cAMP-inhibited cGMP 3,5-cyclic phosphodiesterase 10A	Pde10a
175720000	149600000	204870000		104180000	97138000	144690000		176018210	149898210	205168210		104478210	97436210	144988210		177028210	115634210		0.653197	0.047885				ATP synthase mitochondrial F1 complex assembly factor 1	Atpaf1
157120000	171110000	140990000		90839000	97908000	117600000		157418210	171408210	141288210		91137210	98206210	117898210		1.56705e+08	1.02414e+08		0.653546	0.010098				tRNA(His) guanylyltransferase;Probable tRNA(His) guanylyltransferase	Thg1l
197960000	212200000	216430000		90059000	123620000	195680000		198258210	212498210	216728210		90357210	123918210	195978210		2.09162e+08	136751210		0.653807	0.0840891				TBC1 domain family member 8	Tbc1d8
83866000	123260000	88310000		51104000	45009000	96974000		84164210	123558210	88608210		51402210	45307210	97272210		9.87769e+07	6.46605e+07		0.654612	0.172953				Stromal membrane-associated protein 1	Smap1
54832000	26520000	43641000		26306000	35527000	19683000		55130210	26818210	43939210		26604210	35825210	19981210		4.19625e+07	27470210		0.654636	0.199057				Apolipoprotein M	Apom
56548000	51026000	68251000		47048000	0	67760000		56846210	51324210	68549210		47346210	298210	68058210		5.89065e+07	3.85675e+07		0.654724	0.381043				Eukaryotic peptide chain release factor GTP-binding subunit ERF3B	Gspt2
29685000	35665000	31208000		33489000	29491000	0		29983210	35963210	31506210		33787210	29789210	298210		32484210	2.12915e+07		0.655443	0.355036				WD repeat and FYVE domain-containing protein 3	Wdfy3
87597000	85755000	143240000		87859000	61140000	58342000		87895210	86053210	143538210		88157210	61438210	58640210		1.05829e+08	6.94119e+07		0.655888	0.159105				Heparin cofactor 2	Serpind1
856520000	1735400000	1823200000		971350000	1047700000	876660000		856818210	1735698210	1823498210		971648210	1047998210	876958210		1.472e+09	9.65535e+08		0.655932	0.18048				Estradiol 17-beta-dehydrogenase 11	Hsd17b11
191210000	111530000	142350000		81717000	122660000	87489000		191508210	111828210	142648210		82015210	122958210	87787210		1.48662e+08	9.75869e+07		0.656437	0.126114					Znrf4
182830000	249380000	166820000		158340000	121630000	113480000		183128210	249678210	167118210		158638210	121928210	113778210		1.99975e+08	131448210		0.657324	0.0760253				Protein tyrosine phosphatase type IVA 2;Protein tyrosine phosphatase type IVA 1	Ptp4a1;Ptp4a2
141790000	141680000	105440000		77932000	100630000	76971000		142088210	141978210	105738210		78230210	100928210	77269210		1.29935e+08	8.54759e+07		0.657836	0.0363427				Mediator of RNA polymerase II transcription subunit 8	Med8
90613000	5712300	33537000		30563000	54597000	0		90911210	6010510	33835210		30861210	54895210	298210		4.35856e+07	2.86849e+07		0.658127	0.640744				Transmembrane protein 191C	Tmem191c
2368400000	1814400000	2031000000		1530100000	1180700000	1378800000		2368698210	1814698210	2031298210		1530398210	1180998210	1379098210		2.07156e+09	1363498210		0.658197	0.020462				Toll-interacting protein	Tollip
57833000	67915000	149050000		51548000	67757000	61311000		58131210	68213210	149348210		51846210	68055210	61609210		9.18975e+07	6.05035e+07		0.65838	0.343636				Ankyrin repeat domain-containing protein SOWAHD	Sowahd
21093000	42739000	27989000		20919000	19862000	19408000		21391210	43037210	28287210		21217210	20160210	19706210		30905210	20361210		0.658828	0.174799					Erich1
117660000	123380000	96011000		0	114520000	107290000		117958210	123678210	96309210		298210	114818210	107588210		1.12649e+08	7.42349e+07		0.658995	0.368729					Prss43
37694000	0	38677000		0	22221000	27806000		37992210	298210	38975210		298210	22519210	28104210		25755210	1.69739e+07		0.659046	0.59683				Oxidoreductase NAD-binding domain-containing protein 1	Oxnad1
43300000	52741000	59035000		0	70069000	31832000		43598210	53039210	59333210		298210	70367210	32130210		51990210	34265210		0.65907	0.44143				Squalene monooxygenase	Sqle
59680000	62050000	42745000		62669000	0	45497000		59978210	62348210	43043210		62967210	298210	45795210		55123210	3.63535e+07		0.659496	0.393789					Pigg
104330000	168650000	143960000		37323000	168800000	68742000		104628210	168948210	144258210		37621210	169098210	69040210		139278210	9.19199e+07		0.659973	0.340857				Nesprin-3	Syne3
50622000	101090000	156260000		75087000	50360000	77541000		50920210	101388210	156558210		75385210	50658210	77839210		1.02956e+08	6.79609e+07		0.660099	0.33178				5-AMP-activated protein kinase subunit gamma-1	Prkag1
162990000	172740000	181430000		114570000	96186000	130470000		163288210	173038210	181728210		114868210	96484210	130768210		1.72685e+08	114040210		0.660395	0.00645219				Cordon-bleu protein-like 1	Cobll1
218650000	125450000	177230000		128780000	90407000	124820000		218948210	125748210	177528210		129078210	90705210	125118210		1.74075e+08	114967210		0.660447	0.116401				SWI/SNF-related matrix-associated actin-dependent regulator of chromatin subfamily A containing DEAD/H box 1	Smarcad1
52043000	63600000	46509000		46288000	49158000	11494000		52341210	63898210	46807210		46586210	49456210	11792210		5.43489e+07	3.59449e+07		0.661373	0.233049				Nuclear factor NF-kappa-B p100 subunit;Nuclear factor NF-kappa-B p52 subunit	Nfkb2
266620000	220650000	266340000		178710000	90567000	229190000		266918210	220948210	266638210		179008210	90865210	229488210		2.51502e+08	1.66454e+08		0.66184	0.120924				Serine/threonine-protein phosphatase CPPED1	Cpped1
39553000	22783000	23976000		26996000	29828000	0		39851210	23081210	24274210		27294210	30126210	298210		2.90689e+07	1.92395e+07		0.661861	0.41948				ARL14 effector protein	Arl14ep
29348000	18298000	22345000		19143000	12971000	13970000		29646210	18596210	22643210		19441210	13269210	14268210		2.36285e+07	1.56595e+07		0.662738	0.100884				Protein N-lysine methyltransferase METTL21A	Mettl21A
0	87072000	3814700000		2497500000	0	88789000		298210	87370210	3814998210		2497798210	298210	89087210		1.30089e+09	8.62395e+08		0.662927	0.784576
20640000000	22700000000	22412000000		14015000000	14831000000	14762000000		20640298210	22700298210	22412298210		14015298210	14831298210	14762298210		2.19176e+10	14536298210		0.663224	0.000445018				Long-chain-fatty-acid--CoA ligase ACSBG1	Acsbg1
28300000	44540000	35382000		19649000	26223000	25854000		28598210	44838210	35680210		19947210	26521210	26152210		36372210	2.42069e+07		0.665532	0.077939					Acat3
66025000	56087000	81832000		50544000	33201000	51978000		66323210	56385210	82130210		50842210	33499210	52276210		6.82795e+07	45539210		0.666952	0.0773991				DNA mismatch repair protein Msh3	Msh3
263460000	254620000	20326000		76517000	163010000	119770000		263758210	254918210	20624210		76815210	163308210	120068210		1.79767e+08	1.20064e+08		0.667887	0.513813				Ubiquitin thioesterase otulin	Otulin
533010000	858760000	896850000		624730000	500390000	405630000		533308210	859058210	897148210		625028210	500688210	405928210		7.63172e+08	510548210		0.668982	0.127621				Heparan-alpha-glucosaminide N-acetyltransferase	Hgsnat
9588700000	11425000000	9942600000		6951300000	6593400000	7165200000		9588998210	11425298210	9942898210		6951598210	6593698210	7165498210		1.03191e+10	6903598210		0.669014	0.00433537				Long-chain specific acyl-CoA dehydrogenase, mitochondrial	Acadl
91185000	50233000	40598000		31866000	47170000	42445000		91483210	50531210	40896210		32164210	47468210	42743210		60970210	4.07919e+07		0.669046	0.27974				Mitochondrial basic amino acids transporter	Slc25a29
224790000	222120000	120970000		133970000	92014000	153800000		225088210	222418210	121268210		134268210	92312210	154098210		1.89592e+08	1.26893e+08		0.669296	0.180711				Coilin	Coil
20039000	23822000	14161000		0	11244000	27306000		20337210	24120210	14459210		298210	11542210	27604210		1.96389e+07	13148210		0.669499	0.483168				Solute carrier family 2, facilitated glucose transporter member 8	Slc2a8
284950000	246520000	195260000		176270000	128010000	182270000		285248210	246818210	195558210		176568210	128308210	182568210		2.42542e+08	1.62482e+08		0.669912	0.0619313				Sphingomyelin synthase-related protein 1	Samd8
140460000	55546000	39393000		0	49532000	107940000		140758210	55844210	39691210		298210	49830210	108238210		7.87645e+07	5.27889e+07		0.670211	0.588504				Ig gamma-2A chain C region, A allele;Ig gamma-2A chain C region, membrane-bound form	Ighg;Igh-1a
184860000	50406000	56637000		64706000	42099000	88627000		185158210	50704210	56935210		65004210	42397210	88925210		97599210	65442210		0.67052	0.521564					Cln6
421540000	592330000	427590000		315780000	301780000	349090000		421838210	592628210	427888210		316078210	302078210	349388210		4.80785e+08	3.22515e+08		0.670809	0.0516998				Microtubule-associated proteins 1A/1B light chain 3B	Map1lc3b
180030000	247570000	186210000		156570000	209630000	45437000		180328210	247868210	186508210		156868210	209928210	45735210		2.04902e+08	1.37511e+08		0.671105	0.272154				[Pyruvate dehydrogenase (acetyl-transferring)] kinase isozyme 2, mitochondrial	Pdk2
47596000	47460000	48867000		39061000	30911000	26326000		47894210	47758210	49165210		39359210	31209210	26624210		4.82725e+07	3.23975e+07		0.671138	0.0133446					C78339
38738000	37289000	38915000		40022000	23605000	13325000		39036210	37587210	39213210		40320210	23903210	13623210		38612210	2.59489e+07		0.672038	0.179424				Disintegrin and metalloproteinase domain-containing protein 24	Adam24
67518000	39351000	40806000		27949000	47769000	23300000		67816210	39649210	41104210		28247210	48067210	23598210		49523210	33304210		0.672497	0.242506				SUN domain-containing protein 3	Sun3
9378600	13638000	14407000		0	5919000	18985000		9676810	13936210	14705210		298210	6217210	19283210		1.27727e+07	8.59954e+06		0.673273	0.513151				Lutropin-choriogonadotropic hormone receptor	Lhcgr
40485000	101560000	18518000		0	107940000	0		40783210	101858210	18816210		298210	108238210	298210		53819210	36278210		0.674075	0.708793				DNA-directed RNA polymerase II subunit RPB11	Polr2j
113080000	122710000	141010000		117090000	116830000	19997000		113378210	123008210	141308210		117388210	117128210	20295210		125898210	84937210		0.67465	0.286604				Sarcolemmal membrane-associated protein	Slmap
158600000	50133000	101030000		51084000	69339000	88530000		158898210	50431210	101328210		51382210	69637210	88828210		1.03553e+08	69949210		0.675495	0.367994				Dual specificity protein phosphatase 19	Dusp19
24321000	0	79772000		70026000	0	0		24619210	298210	80070210		70324210	298210	298210		3.49959e+07	23640210		0.675514	0.749519				Intercellular adhesion molecule 1	Icam1
193170000	137020000	179800000		90453000	107900000	146020000		193468210	137318210	180098210		90751210	108198210	146318210		1.70295e+08	115089210		0.675823	0.0792598				Ribulose-phosphate 3-epimerase	Rpe
273290000	641380000	976790000		352280000	221630000	704110000		273588210	641678210	977088210		352578210	221928210	704408210		6.30785e+08	4.26305e+08		0.675832	0.457752				Testis-specific protein TSX	Tsx
19796000	20864000	29247000		27481000	0	19498000		20094210	21162210	29545210		27779210	298210	19796210		2.36005e+07	1.59579e+07		0.676166	0.428891				Mediator of RNA polymerase II transcription subunit 21	Med21
63926000	69806000	55266000		127570000	0	0		64224210	70104210	55564210		127868210	298210	298210		6.32975e+07	4.28215e+07		0.676512	0.656839				Mitochondrial fission factor	Mff
81662000	0	73568000		49616000	55126000	0		81960210	298210	73866210		49914210	55424210	298210		5.20415e+07	35212210		0.676617	0.619731				Solute carrier family 12 member 4	Slc12a4
445590000	451290000	503950000		262200000	336350000	349350000		445888210	451588210	504248210		262498210	336648210	349648210		4.67242e+08	3.16265e+08		0.676877	0.0101062				Alpha-actinin-3	Actn3
206560000	216210000	225910000		169420000	122630000	146900000		206858210	216508210	226208210		169718210	122928210	147198210		2.16525e+08	1.46615e+08		0.677127	0.00876284				Vacuolar protein sorting-associated protein 33A	Vps33a
31824000	28776000	16229000		0	41050000	10826000		32122210	29074210	16527210		298210	41348210	11124210		2.59079e+07	17590210		0.678952	0.562184					Qrich2
128190000	183790000	155720000		55245000	125090000	137220000		128488210	184088210	156018210		55543210	125388210	137518210		156198210	1.0615e+08		0.679584	0.172463				Sulfatase-modifying factor 2	Sumf2
329830000	137420000	155050000		144770000	87141000	191260000		330128210	137718210	155348210		145068210	87439210	191558210		2.07732e+08	141355210		0.680471	0.386765				E3 SUMO-protein ligase NSE2	Nsmce2
135890000	318240000	228650000		176360000	159640000	128560000		136188210	318538210	228948210		176658210	159938210	128858210		2.27892e+08	1.55152e+08		0.680813	0.252693				28S ribosomal protein S17, mitochondrial	Mrps17
160910000	136220000	104690000		114890000	28862000	129590000		161208210	136518210	104988210		115188210	29160210	129888210		134238210	91412210		0.68097	0.2927				DnaJ homolog subfamily C member 15	Dnajc15
91957000	135800000	120120000		129920000	95104000	11795000		92255210	136098210	120418210		130218210	95402210	12093210		116257210	7.92379e+07		0.681574	0.37735				Chromodomain-helicase-DNA-binding protein 1	Chd1
785450000	1000100000	941990000		579440000	608820000	671280000		785748210	1000398210	942288210		579738210	609118210	671578210		909478210	6.20145e+08		0.681869	0.0141677				Aminoacylase-1	Acy1
209870000	197190000	304030000		150920000	147360000	186390000		210168210	197488210	304328210		151218210	147658210	186688210		237328210	1.61855e+08		0.681988	0.103579				GTPase KRas;GTPase KRas, N-terminally processed	Kras;Hras
0	24742000	13179000		11180000	14399000	0		298210	25040210	13477210		11478210	14697210	298210		1.29385e+07	8.82454e+06		0.682035	0.648964				GRAM domain-containing protein 1C	Gramd1c
10510000	9682200	16912000		9684000	15343000	0		10808210	9980410	17210210		9982210	15641210	298210		1.26663e+07	8.64054e+06		0.682169	0.468229				Coronin;Coronin-2A	Coro2a
84850000	143160000	108880000		65951000	73339000	90317000		85148210	143458210	109178210		66249210	73637210	90615210		1.12595e+08	7.68339e+07		0.682392	0.123762				Tyrosyl-DNA phosphodiesterase 2	Tdp2
761630000	187470000	137460000		67643000	192300000	481620000		761928210	187768210	137758210		67941210	192598210	481918210		3.62485e+08	2.47486e+08		0.682748	0.649942				Fatty acid-binding protein, adipocyte	Fabp4
27255000	28958000	44448000		27932000	0	40536000		27553210	29256210	44746210		28230210	298210	40834210		3.38519e+07	2.31209e+07		0.683001	0.460819					Gm773
1272000000	1333000000	1481000000		962450000	830590000	1002300000		1272298210	1333298210	1481298210		962748210	830888210	1002598210		1362298210	932078210		0.684195	0.00601021				Coatomer subunit zeta-1	Copz1
102430000	154000000	111600000		100420000	36304000	114960000		102728210	154298210	111898210		100718210	36602210	115258210		1.22975e+08	8.41929e+07		0.684635	0.250946					Pibf1
19421000	170610000	7912600		0	10219000	125090000		19719210	170908210	8210810		298210	10517210	125388210		66279410	45401210		0.684997	0.767568				Selenoprotein M	Selm
394570000	314180000	468980000		251890000	323930000	231030000		394868210	314478210	469278210		252188210	324228210	231328210		3.92875e+08	269248210		0.685328	0.0793297				Ubiquinone biosynthesis O-methyltransferase, mitochondrial	Coq3
28102000	25387000	27956000		18514000	13717000	23375000		28400210	25685210	28254210		18812210	14015210	23673210		2.74465e+07	1.88335e+07		0.68619	0.0421581					1700109H08Rik
39966000	52710000	8193600		16542000	22137000	30403000		40264210	53008210	8491810		16840210	22435210	30701210		33921410	2.33255e+07		0.687635	0.486449				Tyrosine-protein kinase receptor;Mast/stem cell growth factor receptor Kit	Kit
0	7245200	6519700		1845500	0	7357800		298210	7543410	6817910		2143710	298210	7656010		4886510	3.36598e+06		0.68883	0.658719					Igtp
367940000	278200000	257650000		219170000	123630000	280110000		368238210	278498210	257948210		219468210	123928210	280408210		3.01562e+08	2.07935e+08		0.689527	0.174318				Cysteine-rich protein 1	Crip1
134870000	128180000	85494000		58335000	96504000	85234000		135168210	128478210	85792210		58633210	96802210	85532210		1.1648e+08	8.03225e+07		0.689585	0.132287				Reactive oxygen species modulator 1	Romo1
36410000	39028000	37253000		25384000	27754000	24302000		36708210	39326210	37551210		25682210	28052210	24600210		3.78619e+07	2.61115e+07		0.689653	0.000778299				All-trans-retinol 13,14-reductase	Retsat
42298000	48939000	28115000		21671000	26490000	33909000		42596210	49237210	28413210		21969210	26788210	34207210		40082210	2.76549e+07		0.689954	0.154879				Apolipoprotein B-100;Apolipoprotein B-48	Apob
169290000	294880000	298970000		202870000	153780000	169770000		169588210	295178210	299268210		203168210	154078210	170068210		254678210	1.75772e+08		0.690171	0.15403				Tyrosine-protein kinase receptor TYRO3	Tyro3
426680000	361860000	304760000		287930000	227570000	239470000		426978210	362158210	305058210		288228210	227868210	239768210		3.64732e+08	2.51955e+08		0.690795	0.0470476				Steryl-sulfatase	Sts
147980000	118920000	135270000		78365000	91433000	107830000		148278210	119218210	135568210		78663210	91731210	108128210		1.34355e+08	9.28409e+07		0.691012	0.0256594				Acyl-coenzyme A thioesterase 8	Acot8
28159000	30044000	31480000		17673000	18842000	25188000		28457210	30342210	31778210		17971210	19140210	25486210		3.01925e+07	2.08659e+07		0.691094	0.0209491				PC4 and SFRS1-interacting protein	Psip1
71999000	67435000	57353000		56043000	43021000	36691000		72297210	67733210	57651210		56341210	43319210	36989210		6.58939e+07	4.55499e+07		0.691261	0.0466832				DNA excision repair protein ERCC-1	Ercc1
429720000	383890000	416240000		440200000	151100000	259220000		430018210	384188210	416538210		440498210	151398210	259518210		410248210	2.83805e+08		0.691788	0.212929				Integrator complex subunit 8	Ints8
19753000	0	31165000		34974000	0	0		20051210	298210	31463210		35272210	298210	298210		1.72709e+07	11956210		0.692276	0.737526				Lipoyl synthase, mitochondrial	Lias
504830000	401900000	405660000		277100000	148250000	483390000		505128210	402198210	405958210		277398210	148548210	483688210		4.37762e+08	3.03212e+08		0.692641	0.262507				GDP-mannose 4,6 dehydratase	Gmds
321970000	394250000	382180000		231730000	292810000	236070000		322268210	394548210	382478210		232028210	293108210	236368210		3.66432e+08	2.53835e+08		0.692721	0.019422				Amine oxidase [flavin-containing] B	Maob
229790000	113340000	70689000		79097000	120460000	86968000		230088210	113638210	70987210		79395210	120758210	87266210		1.38238e+08	9.58065e+07		0.693056	0.437168				Ubiquitin-associated domain-containing protein 1	Ubac1
276800000	117260000	95432000		102900000	126840000	109300000		277098210	117558210	95730210		103198210	127138210	109598210		163462210	1.13312e+08		0.693197	0.43316				Protein yippee-like 5	Ypel5
97897000	100850000	102890000		70389000	35788000	102710000		98195210	101148210	103188210		70687210	36086210	103008210		1.00844e+08	69927210		0.69342	0.185819				Kinesin light chain 1	Klc1
108680000	89694000	0		38234000	44763000	54322000		108978210	89992210	298210		38532210	45061210	54620210		6.64229e+07	46071210		0.693605	0.579964				Post-GPI attachment to proteins factor 3	Pgap3
219490000	152770000	130520000		89926000	131380000	127290000		219788210	153068210	130818210		90224210	131678210	127588210		1.67892e+08	1.16497e+08		0.693882	0.159767				Complement component C8 alpha chain	C8a
35814000	35671000	32094000		25716000	16535000	29389000		36112210	35969210	32392210		26014210	16833210	29687210		3.48245e+07	24178210		0.694286	0.0567478				Activating transcription factor 7-interacting protein 2	Atf7ip2
408890000	377330000	381750000		272520000	240400000	297780000		409188210	377628210	382048210		272818210	240698210	298078210		3.89622e+08	2.70532e+08		0.694344	0.00351204				Bifunctional 3-phosphoadenosine 5-phosphosulfate synthase 1;Sulfate adenylyltransferase;Adenylyl-sulfate kinase	Papss1
99144000000	95254000000	107990000000		66281000000	75362000000	68326000000		99144298210	95254298210	107990298210		66281298210	75362298210	68326298210		100796298210	6.999e+10		0.69437	0.00272523				Retinal dehydrogenase 1	Aldh1a1
425500000	297490000	227970000		258990000	148050000	253110000		425798210	297788210	228268210		259288210	148348210	253408210		3.17285e+08	220348210		0.694481	0.228023				Paraneoplastic antigen Ma1 homolog	Pnma1
1234900000	917960000	875940000		733720000	625120000	745270000		1235198210	918258210	876238210		734018210	625418210	745568210		1009898210	701668210		0.694791	0.0614969				Lipase maturation factor 2	Lmf2
61425000	42436000	78156000		0	80891000	45345000		61723210	42734210	78454210		298210	81189210	45643210		6.09705e+07	4.23769e+07		0.695039	0.50758				WD repeat-containing protein 78	Wdr78		IAD IC: f/l1
187500000	259050000	245510000		191620000	150520000	138670000		187798210	259348210	245808210		191918210	150818210	138968210		2.30985e+08	160568210		0.695146	0.0606587				Protein FAM45A	Fam45a
38333000	40184000	36127000		32116000	24101000	23208000		38631210	40482210	36425210		32414210	24399210	23506210		3.85129e+07	26773210		0.695176	0.0186227				Peptidyl-prolyl cis-trans isomerase FKBP7;Peptidyl-prolyl cis-trans isomerase	Fkbp7
157470000	141070000	141080000		95747000	84120000	125720000		157768210	141368210	141378210		96045210	84418210	126018210		146838210	1.02161e+08		0.695735	0.029967				Probable E3 ubiquitin-protein ligase DTX2	Dtx2
22122000	66917000	78960000		55539000	0	61095000		22420210	67215210	79258210		55837210	298210	61393210		5.62979e+07	39176210		0.695874	0.547149				Microtubule-associated protein RP/EB family member 2	Mapre2
31727000000	26995000000	26545000000		21700000000	17379000000	20275000000		31727298210	26995298210	26545298210		21700298210	17379298210	20275298210		2.84226e+10	1.9785e+10		0.696099	0.0144325
250610000	282840000	280520000		213970000	132490000	220170000		250908210	283138210	280818210		214268210	132788210	220468210		2.71622e+08	1.89175e+08		0.696465	0.0519352				Enoyl-CoA hydratase domain-containing protein 2, mitochondrial	Echdc2
41134000	80257000	65853000		39081000	60375000	30705000		41432210	80555210	66151210		39379210	60673210	31003210		6.27129e+07	43685210		0.696591	0.257992				Ectonucleoside triphosphate diphosphohydrolase 4	Entpd4
83097000	76834000	61301000		88810000	3969800	61091000		83395210	77132210	61599210		89108210	4268010	61389210		74042210	5.15885e+07		0.696744	0.433303				Thymidine kinase 2, mitochondrial	Tk2
538670000	691520000	538640000		286110000	488820000	458080000		538968210	691818210	538938210		286408210	489118210	458378210		589908210	4.11302e+08		0.69723	0.0923727				Sodium/potassium-transporting ATPase subunit alpha-2;Sodium/potassium-transporting ATPase subunit alpha-3	Atp1a2;Atp1a3
457510000	490740000	423750000		295540000	300500000	360420000		457808210	491038210	424048210		295838210	300798210	360718210		4.57632e+08	319118210		0.697326	0.00821456				ATP synthase protein 8	mt-Atp8;Mtatp8
260580000	219380000	250610000		185160000	215170000	108880000		260878210	219678210	250908210		185458210	215468210	109178210		2.43822e+08	1.70035e+08		0.697374	0.0956826				Dynein intermediate chain 1, axonemal	Dnaic1;Dnai1	pcd	OAD IC
66199000	74349000	76182000		42267000	51370000	57308000		66497210	74647210	76480210		42565210	51668210	57606210		7.25415e+07	50613210		0.697713	0.0148002				Homocysteine-responsive endoplasmic reticulum-resident ubiquitin-like domain member 1 protein	Herpud1
611500000	572910000	568450000		413990000	389320000	419540000		611798210	573208210	568748210		414288210	389618210	419838210		5.84585e+08	4.07915e+08		0.697786	0.000433606				Ubiquitin-like modifier-activating enzyme 5	Uba5
882730000	363670000	423710000		310950000	380750000	473900000		883028210	363968210	424008210		311248210	381048210	474198210		5.57002e+08	3.88832e+08		0.69808	0.38004				NADH-ubiquinone oxidoreductase chain 4	mt-Nd4;Mtnd4
113310000	129950000	111830000		56954000	76928000	113960000		113608210	130248210	112128210		57252210	77226210	114258210		1.18662e+08	82912210		0.698729	0.113259				GPN-loop GTPase 3	Gpn3
62072000	57496000	51127000		37143000	40957000	40989000		62370210	57794210	51425210		37441210	41255210	41287210		5.71965e+07	3.99945e+07		0.699248	0.00734064				StAR-related lipid transfer protein 5	Stard5
0	9822200	5999700		0	10796000	0		298210	10120410	6297910		298210	11094210	298210		5.57218e+06	3.89688e+06		0.699345	0.733919				Serine/threonine-protein kinase haspin	Gsg2
1518100000	1587700000	1915300000		883940000	1173300000	1456700000		1518398210	1587998210	1915598210		884238210	1173598210	1456998210		1673998210	1.17161e+09		0.699888	0.0710801				Copper transport protein ATOX1	Atox1
114320000	126280000	145420000		101770000	93753000	74391000		114618210	126578210	145718210		102068210	94051210	74689210		1.28972e+08	9.02695e+07		0.699918	0.03352				Rho-related GTP-binding protein RhoB	Rhob
151220000	251130000	195730000		135070000	133620000	149950000		151518210	251428210	196028210		135368210	133918210	150248210		199658210	1.39845e+08		0.700421	0.111345				39S ribosomal protein L17, mitochondrial	Mrpl17
691420000	412950000	547690000		423380000	243060000	490470000		691718210	413248210	547988210		423678210	243358210	490768210		5.50985e+08	3.85935e+08		0.700445	0.205158				Translocating chain-associated membrane protein;Translocating chain-associated membrane protein 1	Tram1
206720000	134510000	196300000		168820000	135510000	71957000		207018210	134808210	196598210		169118210	135808210	72255210		1.79475e+08	125727210		0.700528	0.212445				Macrophage-capping protein	Capg
110180000	78503000	196370000		76817000	86391000	106270000		110478210	78801210	196668210		77115210	86689210	106568210		128649210	90124210		0.700542	0.34803				Mitochondrial fission regulator 1-like	Mtfr1l
1263100000	1615700000	1282500000		771950000	979550000	1164600000		1263398210	1615998210	1282798210		772248210	979848210	1164898210		1387398210	9.72332e+08		0.700831	0.0615724				Protein Niban	Fam129a
144390000	129950000	106090000		68607000	77770000	120090000		144688210	130248210	106388210		68905210	78068210	120388210		127108210	8.91205e+07		0.701139	0.121728				Vesicle transport through interaction with t-SNAREs homolog 1B	Vti1b
26560000	20755000	20963000		25788000	0	21826000		26858210	21053210	21261210		26086210	298210	22124210		2.30575e+07	1.61695e+07		0.701269	0.450226				Peroxisomal leader peptide-processing protease;Peroxisomal leader peptide-processing protease, 10 kDa form;Peroxisomal leader peptide-processing protease, 49 kDa form	Tysnd1
51958000	44105000	54958000		58563000	47082000	0		52256210	44403210	55256210		58861210	47380210	298210		5.06385e+07	35513210		0.701308	0.452818				Beta-1,4-galactosyltransferase 7;Xylosylprotein 4-beta-galactosyltransferase	B4galt7
317250000	269320000	159990000		103390000	152190000	267980000		317548210	269618210	160288210		103688210	152488210	268278210		2.49152e+08	174818210		0.701654	0.332208				Protein angel homolog 2	Angel2
153500000	72841000	62212000		102550000	63740000	36086000		153798210	73139210	62510210		102848210	64038210	36384210		9.64825e+07	6.77569e+07		0.702271	0.453981				Endoplasmic reticulum mannosyl-oligosaccharide 1,2-alpha-mannosidase	Man1b1
90708000	64418000	81399000		46692000	58281000	60960000		91006210	64716210	81697210		46990210	58579210	61258210		7.91399e+07	55609210		0.70267	0.0565384				Phosphomevalonate kinase	Pmvk
145120000	146600000	136380000		110910000	92114000	97585000		145418210	146898210	136678210		111208210	92412210	97883210		142998210	100501210		0.702814	0.00271385				Solute carrier family 35 member F2	Slc35f2
840280000	761830000	707610000		541460000	590980000	491070000		840578210	762128210	707908210		541758210	591278210	491368210		7.70205e+08	541468210		0.703018	0.00894407				Gamma-glutamylcyclotransferase	Ggct
502490000	302480000	276500000		229360000	258540000	272210000		502788210	302778210	276798210		229658210	258838210	272508210		360788210	253668210		0.703095	0.213625				Protein transport protein Sec61 subunit alpha isoform 2	Sec61a2
136720000	135610000	98834000		74940000	88652000	97170000		137018210	135908210	99132210		75238210	88950210	97468210		1.2402e+08	8.72189e+07		0.703267	0.0586299				Round spermatid basic protein 1	Rsbn1
230630000	167100000	164080000		125160000	72199000	197520000		230928210	167398210	164378210		125458210	72497210	197818210		187568210	1.31925e+08		0.703342	0.258773				Cyclin-L1	Ccnl1
379790000	299340000	362580000		228060000	216970000	287480000		380088210	299638210	362878210		228358210	217268210	287778210		3.47535e+08	244468210		0.703435	0.0348474					2410002F23Rik
708480000	599930000	533370000		385600000	368110000	542490000		708778210	600228210	533668210		385898210	368408210	542788210		6.14225e+08	4.32365e+08		0.70392	0.0732815				28S ribosomal protein S36, mitochondrial	Mrps36
5107400000	6267000000	7381000000		5826900000	3611900000	3766800000		5107698210	6267298210	7381298210		5827198210	3612198210	3767098210		6252098210	4.40216e+09		0.70411	0.129111				Heat shock protein beta-1	Hspb1
544900000	557210000	628810000		432200000	398720000	387620000		545198210	557508210	629108210		432498210	399018210	387918210		5.77272e+08	406478210		0.704137	0.00436499				Inter-alpha-trypsin inhibitor heavy chain H2	Itih2
1409300000	1076400000	1159900000		880000000	868310000	819250000		1409598210	1076698210	1160198210		880298210	868608210	819548210		1215498210	8.56152e+08		0.704363	0.0241683				Cytochrome b	mt-Cytb;Mt-Cyb
9924100	11544000	6240800		7937700	11325000	0		10222310	11842210	6539010		8235910	11623210	298210		9534510	6719110		0.704715	0.489613				ADP-ribosylation factor-like protein 15	Arl15
67897000	44990000	74023000		63617000	42137000	25730000		68195210	45288210	74321210		63915210	42435210	26028210		6.26015e+07	44126210		0.704874	0.259851				DnaJ homolog subfamily C member 24	Dnajc24
0	3981500000	5334900000		6568200000	0	0		298210	3981798210	5335198210		6568498210	298210	298210		3.10576e+09	2189698210		0.705043	0.752544					Gm11214
2221200000	2163500000	2639800000		1670200000	1697000000	1586200000		2221498210	2163798210	2640098210		1670498210	1697298210	1586498210		2341798210	1.65143e+09		0.705198	0.0109027				Microsomal glutathione S-transferase 1	Mgst1
112580000	145960000	116420000		63727000	96772000	103800000		112878210	146258210	116718210		64025210	97070210	104098210		1.25285e+08	8.83979e+07		0.705575	0.0856326				Peptidyl-prolyl cis-trans isomerase FKBP14;Peptidyl-prolyl cis-trans isomerase	Fkbp14
111640000	78054000	83776000		59660000	59150000	74080000		111938210	78352210	84074210		59958210	59448210	74378210		9.14549e+07	6.45949e+07		0.706303	0.0792328				Gamma-secretase subunit PEN-2	Psenen
122480000	130430000	128300000		86069000	79819000	103290000		122778210	130728210	128598210		86367210	80117210	103588210		127368210	90024210		0.706803	0.00728084				AP-4 complex subunit mu-1	Ap4m1
69487000	78732000	116780000		45216000	71496000	70368000		69785210	79030210	117078210		45514210	71794210	70666210		88631210	62658210		0.706954	0.197493					Rsf1
254090000	322030000	342420000		252560000	253100000	143480000		254388210	322328210	342718210		252858210	253398210	143778210		306478210	216678210		0.706994	0.117798				Proteasome assembly chaperone 3	Psmg3;Gm26938
100780000	65750000	50918000		52194000	38565000	62866000		101078210	66048210	51216210		52492210	38863210	63164210		7.27809e+07	5.15065e+07		0.707693	0.263574				Meckel syndrome type 1 protein homolog	Mks1
72212000	47356000	40506000		31734000	45491000	35814000		72510210	47654210	40804210		32032210	45789210	36112210		53656210	3.79779e+07		0.7078	0.208288					Tex21
153740000	216800000	187370000		104610000	145850000	144180000		154038210	217098210	187668210		104908210	146148210	144478210		186268210	1.31845e+08		0.707823	0.0742208				Glycerophosphocholine phosphodiesterase GPCPD1	Gpcpd1
47394000	50564000	70998000		39383000	40984000	39010000		47692210	50862210	71296210		39681210	41282210	39308210		5.66169e+07	4.00905e+07		0.708102	0.0899202				LIM and cysteine-rich domains protein 1	Lmcd1
337720000	390500000	367020000		230570000	270940000	273890000		338018210	390798210	367318210		230868210	271238210	274188210		365378210	2.58765e+08		0.708211	0.00673911				Alpha-methylacyl-CoA racemase	Amacr
46432000	65192000	53220000		0	60043000	56459000		46730210	65490210	53518210		298210	60341210	56757210		55246210	39132210		0.708324	0.46977				Mediator of RNA polymerase II transcription subunit 29	Med29
62235000	64394000	37195000		32718000	46401000	36708000		62533210	64692210	37493210		33016210	46699210	37006210		54906210	38907210		0.708612	0.171903				Ankyrin and armadillo repeat-containing protein	Ankar
75383000	119540000	47959000		44764000	88532000	38682000		75681210	119838210	48257210		45062210	88830210	38980210		8.12589e+07	57624210		0.709144	0.416419				Amyotrophic lateral sclerosis 2 chromosomal region candidate gene 12 protein homolog	Als2cr12
46603000	41995000	57856000		33369000	36340000	33907000		46901210	42293210	58154210		33667210	36638210	34205210		49116210	3.48369e+07		0.709275	0.0409104					Smim20
609460000	707230000	502460000		416600000	424550000	450120000		609758210	707528210	502758210		416898210	424848210	450418210		6.06682e+08	4.30722e+08		0.709963	0.0426802					1700011M02Rik;Gm9112
54460000	44382000	59861000		0	67180000	45358000		54758210	44680210	60159210		298210	67478210	45656210		53199210	3.78109e+07		0.710741	0.490615					Tsc22d4
0	0	21811000		0	0	15251000		298210	298210	22109210		298210	298210	15549210		7.56854e+06	5.38188e+06		0.711085	0.817439				Repulsive guidance molecule A	Rgma
98927000	70412000	72293000		43212000	62075000	66311000		99225210	70710210	72591210		43510210	62373210	66609210		80842210	5.74975e+07		0.711232	0.115086				Nucleoside diphosphate kinase 3	Nme3
204890000	168090000	116970000		115650000	70720000	162070000		205188210	168388210	117268210		115948210	71018210	162368210		1.63615e+08	1.16445e+08		0.711701	0.267826				Protein furry homolog	Fry
118200000	79431000	66031000		61083000	47758000	78591000		118498210	79729210	66329210		61381210	48056210	78889210		8.81855e+07	6.27755e+07		0.711858	0.231124				Pericentrin	Pcnt
156670000	175110000	141530000		111270000	93960000	131730000		156968210	175408210	141828210		111568210	94258210	132028210		158068210	112618210		0.712466	0.035835				GPN-loop GTPase 1	Gpn1
134140000	120530000	54365000		50275000	66365000	103280000		134438210	120828210	54663210		50573210	66663210	103578210		1.0331e+08	7.36049e+07		0.712467	0.36669				HSPB1-associated protein 1	Hspbap1
119560000	110210000	135630000		73705000	66628000	119870000		119858210	110508210	135928210		74003210	66926210	120168210		122098210	8.70325e+07		0.712808	0.127364				Membrane progestin receptor alpha	Paqr7
11791000000	7801600000	12722000000		6951700000	7399300000	8743500000		11791298210	7801898210	12722298210		6951998210	7399598210	8743798210		1.07718e+10	7.69846e+09		0.714685	0.127543				NADPH:adrenodoxin oxidoreductase, mitochondrial	Fdxr
299120000	358100000	178240000		189570000	235500000	171970000		299418210	358398210	178538210		189868210	235798210	172268210		2.78785e+08	1.99312e+08		0.71493	0.230374				NEDD8	Nedd8
211420000	260110000	267810000		270870000	25342000	232130000		211718210	260408210	268108210		271168210	25640210	232428210		2.46745e+08	176412210		0.714958	0.41945				DNA repair protein RAD51 homolog 1	Rad51
25351000	15600000	36998000		29152000	12367000	13959000		25649210	15898210	37296210		29450210	12665210	14257210		26281210	1.87909e+07		0.714993	0.411512				Inositol 1,4,5-trisphosphate receptor type 3	Itpr3
1344900000	1147000000	1004300000		823710000	690440000	986490000		1345198210	1147298210	1004598210		824008210	690738210	986788210		1165698210	8.33845e+08		0.715318	0.0640331				Cysteine protease ATG4B	Atg4b
220450000	199380000	108990000		85482000	38564000	254060000		220748210	199678210	109288210		85780210	38862210	254358210		1.76572e+08	1.26334e+08		0.715481	0.533525				Trans-1,2-dihydrobenzene-1,2-diol dehydrogenase	Dhdh
665470000	712620000	681170000		548680000	345900000	578680000		665768210	712918210	681468210		548978210	346198210	578978210		686718210	4.91385e+08		0.715555	0.0584874				Deoxyhypusine hydroxylase	Dohh
16097000	13321000	8894800		0	10568000	16610000		16395210	13619210	9193010		298210	10866210	16908210		1.30691e+07	9.35754e+06		0.716003	0.521406				rRNA-processing protein FCF1 homolog	Fcf1
39845000	28037000	22779000		15205000	27045000	22422000		40143210	28335210	23077210		15503210	27343210	22720210		3.05185e+07	2.18555e+07		0.71614	0.229212				ETS-related transcription factor Elf-2	Elf2
206520000	276490000	257820000		183270000	167200000	179820000		206818210	276788210	258118210		183568210	167498210	180118210		2.47242e+08	1.77062e+08		0.716148	0.0308723				Maspardin	Spg21
420460000	298290000	287560000		243130000	235680000	242600000		420758210	298588210	287858210		243428210	235978210	242898210		3.35735e+08	240768210		0.717138	0.0901634				Glycerol-3-phosphate acyltransferase 1, mitochondrial	Gpam
151420000	46629000	67866000		59899000	63637000	67086000		151718210	46927210	68164210		60197210	63935210	67384210		8.89365e+07	6.38389e+07		0.717803	0.477363				E3 ubiquitin-protein ligase MARCH11	2011-03-01
37895000	60096000	46122000		48201000	1099000	53908000		38193210	60394210	46420210		48499210	1397210	54206210		4.83359e+07	3.47009e+07		0.717911	0.489658				Death-associated protein 1	Dap
49228000	57921000	42086000		52882000	0	54054000		49526210	58219210	42384210		53180210	298210	54352210		50043210	3.59435e+07		0.71825	0.486327				Kinesin-like protein KIF1B;Kinesin-like protein;Kinesin-like protein KIF1A	Kif1b;Kif1a
39537000	56688000	51153000		55610000	0	50057000		39835210	56986210	51451210		55908210	298210	50355210		49424210	3.55205e+07		0.718687	0.491747				Protein phosphatase PTC7 homolog	Pptc7
197330000	194240000	115820000		111810000	133930000	118680000		197628210	194538210	116118210		112108210	134228210	118978210		169428210	1.21772e+08		0.718721	0.157658					Nsmce4a
46874000	34468000	43577000		25225000	27568000	36776000		47172210	34766210	43875210		25523210	27866210	37074210		4.19379e+07	3.01545e+07		0.719029	0.0827188				ATP-binding cassette sub-family D member 1	Abcd1
99617000	184280000	190930000		115160000	110780000	115460000		99915210	184578210	191228210		115458210	111078210	115758210		1.58574e+08	114098210		0.719527	0.205269				5-AMP-activated protein kinase catalytic subunit alpha-1	Prkaa1
737300000	1216800000	1128700000		520480000	630940000	1067400000		737598210	1217098210	1128998210		520778210	631238210	1067698210		1027898210	7.39905e+08		0.719823	0.265572				Sorbitol dehydrogenase	Sord
60899000	49205000	47952000		65603000	47926000	0		61197210	49503210	48250210		65901210	48224210	298210		5.29835e+07	38141210		0.719869	0.499762				Glypican-1;Secreted glypican-1	Gpc1
237020000	196310000	168890000		157320000	175190000	100860000		237318210	196608210	169188210		157618210	175488210	101158210		201038210	1.44755e+08		0.720037	0.132831				Rab GTPase-activating protein 1-like	Rabgap1l
79556000	9540900	0		35130000	12074000	16738000		79854210	9839110	298210		35428210	12372210	17036210		2.99972e+07	21612210		0.720475	0.763654				Neural cell adhesion molecule 1	Ncam1
5974300000	3730000000	5618600000		3421000000	7586100000	36148000		5974598210	3730298210	5618898210		3421298210	7586398210	36446210		5.10793e+09	3.68138e+09		0.720719	0.567358				Renalase	Rnls
41433000	41355000	39302000		28432000	29137000	30200000		41731210	41653210	39600210		28730210	29435210	30498210		4.09949e+07	2.95545e+07		0.720933	0.000190128				Coatomer subunit zeta-2	Copz2
116270000	88670000	35018000		51276000	87612000	33958000		116568210	88968210	35316210		51574210	87910210	34256210		80284210	5.79135e+07		0.721357	0.478063					1700001E04Rik;Gm10338;Gm3187;Gm10413;Gm8279;Gm5795;Gm3532;D830030K20Rik;EG545013;Gm3727;Gm3149;Gm21103;Gm5458;Gm6337;Gm8297;Gm3029;Gm7876;Gm3685;Gm3476;Gm3460;Gm8246;Gm3115;Gm3424;Gm3453;Gm8050;Gm8271;Gm3278;Gm2244;Gm16440;Gm3043;Gm3047;Gm8159;Gm3173;Gm3591;Gm3033;Gm3005;Gm8237;Gm2974;2610042L04Rik;Gm10409;Gm3411;Gm3252;Gm3020;Gm2237;Gm3755;Gm3298;Gm3373;Gm3468;Gm8374;Gm2897;Gm3239;Gm3636;Gm3264;…
26727000	22382000	24828000		20311000	13138000	19671000		27025210	22680210	25126210		20609210	13436210	19969210		2.49439e+07	1.80049e+07		0.721815	0.0567218				Peroxisomal coenzyme A diphosphatase NUDT7	Nudt7
44596000	43361000	48483000		49681000	0	48556000		44894210	43659210	48781210		49979210	298210	48854210		45778210	3.30439e+07		0.721825	0.482033				Charged multivesicular body protein 1b-1	Chmp1b1
13612000000	13934000000	14715000000		9455300000	10675000000	10379000000		13612298210	13934298210	14715298210		9455598210	10675298210	10379298210		14087298210	1.01701e+10		0.721932	0.00134912				Isocitrate dehydrogenase [NADP] cytoplasmic	Idh1
68946000	76501000	86267000		48995000	52873000	65170000		69244210	76799210	86565210		49293210	53171210	65468210		77536210	5.59775e+07		0.721954	0.0368353				Receptor protein-tyrosine kinase;Tyrosine-protein kinase receptor UFO	Axl
199650000	145210000	150960000		114440000	165510000	77867000		199948210	145508210	151258210		114738210	165808210	78165210		1.65572e+08	1.19571e+08		0.722168	0.208715				Protein HEXIM1	Hexim1
10058000000	9725000000	10569000000		7744500000	6694400000	7488800000		10058298210	9725298210	10569298210		7744798210	6694698210	7489098210		1.01176e+10	7.30953e+09		0.722455	0.00217348				4-aminobutyrate aminotransferase, mitochondrial	Abat
75179000	131580000	113820000		129690000	57597000	44284000		75477210	131878210	114118210		129988210	57895210	44582210		1.07158e+08	7.74885e+07		0.723125	0.397146				Ribosomal biogenesis protein LAS1L	Las1l
123380000	70226000	95245000		57248000	82727000	68866000		123678210	70524210	95543210		57546210	83025210	69164210		9.65819e+07	6.99119e+07		0.723861	0.192353				28S ribosomal protein S25, mitochondrial	Mrps25
526580000	471550000	453430000		529370000	476860000	45860000		526878210	471848210	453728210		529668210	477158210	46158210		4.84152e+08	3.50995e+08		0.724969	0.438029				Histone H1.3	Hist1h1d
282020000	171770000	173340000		151440000	130040000	173090000		282318210	172068210	173638210		151738210	130338210	173388210		2.09342e+08	1.51822e+08		0.725234	0.209947				Nuclear receptor corepressor 2	Ncor2
200000000	97859000	203400000		81880000	81518000	200020000		200298210	98157210	203698210		82178210	81816210	200318210		1.67385e+08	1.21438e+08		0.7255	0.430756				Teashirt homolog 1	Tshz1
113580000	148990000	110960000		77630000	76309000	116940000		113878210	149288210	111258210		77928210	76607210	117238210		124808210	90591210		0.725843	0.131877				Putative deoxyribonuclease TATDN1	Tatdn1
10911000	10384000	12411000		6045300	9127200	9055300		11209210	10682210	12709210		6343510	9425410	9353510		1.15335e+07	8.37414e+06		0.726069	0.055795				MAGUK p55 subfamily member 5	Mpp5
39051000	35877000	39974000		32578000	17495000	33148000		39349210	36175210	40272210		32876210	17793210	33446210		3.85989e+07	2.80385e+07		0.726408	0.115775				Caspase-3;Caspase-3 subunit p17;Caspase-3 subunit p12	Casp3
155710000	129780000	163370000		115190000	106710000	103920000		156008210	130078210	163668210		115488210	107008210	104218210		149918210	1.08905e+08		0.726429	0.0186471				GRAM domain-containing protein 1B	Gramd1b
324710000	337150000	357000000		239210000	269880000	231030000		325008210	337448210	357298210		239508210	270178210	231328210		339918210	2.47005e+08		0.72666	0.0035457				Inter-alpha-trypsin inhibitor heavy chain H1	Itih1
1251900000	1332900000	1192000000		773660000	956180000	1016300000		1252198210	1333198210	1192298210		773958210	956478210	1016598210		1.25923e+09	915678210		0.727172	0.0147388				Sodium/potassium-transporting ATPase subunit beta-3	Atp1b3
276260000	317190000	346810000		217650000	220240000	245820000		276558210	317488210	347108210		217948210	220538210	246118210		313718210	2.28202e+08		0.727409	0.0186545				Sterol 26-hydroxylase, mitochondrial	Cyp27a1
53171000	52718000	54641000		35080000	40543000	40936000		53469210	53016210	54939210		35378210	40841210	41234210		53808210	39151210		0.727607	0.00176644				Coiled-coil domain-containing protein 97	Ccdc97		pre-mRNA splicing
850420000	403720000	286250000		421830000	262800000	436090000		850718210	404018210	286548210		422128210	263098210	436388210		5.13762e+08	3.73872e+08		0.727714	0.481844				Double-strand-break repair protein rad21 homolog	Rad21
997680000	560570000	1223900000		804620000	495750000	724780000		997978210	560868210	1224198210		804918210	496048210	725078210		9.27682e+08	675348210		0.727996	0.306765					Pramef6;Gm13078;Gm13083
39923000	64858000	58988000		35729000	31153000	52175000		40221210	65156210	59286210		36027210	31451210	52473210		5.48879e+07	3.99839e+07		0.728465	0.205499				3-keto-steroid reductase	Hsd17b7
44323000	34660000	38549000		22378000	33911000	29087000		44621210	34958210	38847210		22676210	34209210	29385210		3.94755e+07	2.87569e+07		0.728473	0.0700685				Sorting nexin-25	Snx25
54597000	73021000	67272000		37405000	51848000	52518000		54895210	73319210	67570210		37703210	52146210	52816210		6.52615e+07	47555210		0.728687	0.0734544				Growth arrest-specific protein 6	Gas6
141550000	169840000	117450000		102960000	104340000	105250000		141848210	170138210	117748210		103258210	104638210	105548210		1.43245e+08	1.04482e+08		0.729391	0.0627784				Molybdate-anion transporter	Mfsd5
317610000	279030000	300670000		219060000	190670000	244830000		317908210	279328210	300968210		219358210	190968210	245128210		2.99402e+08	2.18485e+08		0.729739	0.013578				HEAT repeat-containing protein 3	Heatr3
87451000	63764000	35731000		42302000	32760000	61257000		87749210	64062210	36029210		42600210	33058210	61555210		6.26135e+07	4.57379e+07		0.730479	0.380422				UHRF1-binding protein 1-like	Uhrf1bp1l
333880000	244470000	224510000		183670000	214280000	188390000		334178210	244768210	224808210		183968210	214578210	188688210		267918210	1.95745e+08		0.730614	0.107816				ATPase WRNIP1	Wrnip1
1141400000	708160000	1145500000		943510000	553020000	692200000		1141698210	708458210	1145798210		943808210	553318210	692498210		9.98652e+08	7.29875e+08		0.73086	0.219289				Alcohol dehydrogenase 1	Adh1
99702000	0	143040000		59027000	58560000	59756000		100000210	298210	143338210		59325210	58858210	60054210		81212210	5.94125e+07		0.731572	0.633854				Plasma kallikrein;Plasma kallikrein heavy chain;Plasma kallikrein light chain	Klkb1
382530000	361410000	310570000		276440000	343360000	152190000		382828210	361708210	310868210		276738210	343658210	152488210		3.51802e+08	257628210		0.732311	0.19125				Transmembrane protein 147	Tmem147
42951000	25080000	50872000		30773000	28840000	27230000		43249210	25378210	51170210		31071210	29138210	27528210		3.99325e+07	2.92459e+07		0.732382	0.237297
39959000	48930000	36277000		34100000	33734000	23602000		40257210	49228210	36575210		34398210	34032210	23900210		42020210	3.07769e+07		0.73243	0.0919284				Guanine nucleotide-binding protein subunit alpha-12	Gna12
62046000	71444000	195970000		70483000	125200000	45428000		62344210	71742210	196268210		70781210	125498210	45726210		110118210	8.06685e+07		0.732563	0.581475				Heme-binding protein 2	Hebp2
865710000	762580000	702050000		571310000	622580000	513010000		866008210	762878210	702348210		571608210	622878210	513308210		777078210	5.69265e+08		0.732571	0.0222346				Tripeptidyl-peptidase 1	Tpp1
19036000	13962000	19564000		19149000	0	19125000		19334210	14260210	19862210		19447210	298210	19423210		1.78189e+07	13056210		0.732718	0.51192				Dual specificity protein kinase CLK4	Clk4
444310000	606200000	562660000		429720000	478090000	274910000		444608210	606498210	562958210		430018210	478388210	275208210		5.38022e+08	394538210		0.733313	0.139929				Aldo-keto reductase family 1 member C13	Akr1c13;Akr1c12
345790000	319550000	327310000		230290000	236530000	261560000		346088210	319848210	327608210		230588210	236828210	261858210		3.31182e+08	2.43092e+08		0.734013	0.0020263				Cyclin-Y	Ccny
35388000	47896000	35899000		30666000	31143000	25477000		35686210	48194210	36197210		30964210	31441210	25775210		4.00259e+07	2.93935e+07		0.734364	0.0761709				Hydroxyacid-oxoacid transhydrogenase, mitochondrial	Adhfe1
123850000	141050000	125650000		109140000	94418000	83012000		124148210	141348210	125948210		109438210	94716210	83310210		1.30482e+08	9.58215e+07		0.734369	0.0205418				Putative tRNA (cytidine(32)/guanosine(34)-2-O)-methyltransferase	Ftsj1
208700000	213550000	145560000		102190000	184360000	130570000		208998210	213848210	145858210		102488210	184658210	130868210		189568210	139338210		0.735029	0.19778				DNA-directed RNA polymerases I, II, and III subunit RPABC5	Usp50;Polr2l
26894000	124630000	156140000		0	141020000	84950000		27192210	124928210	156438210		298210	141318210	85248210		1.02853e+08	7.56215e+07		0.73524	0.65511				Post-GPI attachment to proteins factor 2	Pgap2
1418200000	1330700000	1769200000		1082800000	1019700000	1219900000		1418498210	1330998210	1769498210		1083098210	1019998210	1220198210		1.50633e+09	1.10776e+09		0.735406	0.0528923				Hydroxymethylglutaryl-CoA synthase, cytoplasmic	Hmgcs1
153000000	0	141000000		34490000	71477000	110250000		153298210	298210	141298210		34788210	71775210	110548210		98298210	7.23705e+07		0.736235	0.654874				Platelet glycoprotein 4	Cd36
151150000	175430000	180330000		142540000	73753000	156690000		151448210	175728210	180628210		142838210	74051210	156988210		169268210	1.24626e+08		0.736263	0.175555				RAD50-interacting protein 1	Rint1
238030000	214320000	309720000		225010000	190730000	145150000		238328210	214618210	310018210		225308210	191028210	145448210		2.54322e+08	1.87262e+08		0.736318	0.14285				Uncharacterized protein C3orf62 homolog
269580000	238990000	302140000		209640000	291050000	96201000		269878210	239288210	302438210		209938210	291348210	96499210		2.70535e+08	1.99262e+08		0.736548	0.29618				Cleavage and polyadenylation specificity factor subunit 4	Cpsf4
37311000	40807000	49555000		27225000	26659000	39920000		37609210	41105210	49853210		27523210	26957210	40218210		4.28559e+07	31566210		0.736567	0.116682					Snx19
7999300	77747000	0		0	0	62948000		8297510	78045210	298210		298210	298210	63246210		28880310	2.12809e+07		0.736865	0.826086				Dynamin-2	Dnm2
182820000	130790000	169130000		109060000	130340000	116150000		183118210	131088210	169428210		109358210	130638210	116448210		1.61212e+08	1.18815e+08		0.737012	0.0649102				Acyl-coenzyme A oxidase;Peroxisomal acyl-coenzyme A oxidase 3	Acox3
39848000	33489000	27924000		33330000	18773000	22298000		40146210	33787210	28222210		33628210	19071210	22596210		3.40519e+07	2.50985e+07		0.737068	0.183606					Slmap
753910000	858330000	766240000		640490000	569770000	542990000		754208210	858628210	766538210		640788210	570068210	543288210		7.93125e+08	5.84715e+08		0.737229	0.00902041				V-type proton ATPase subunit a;V-type proton ATPase 116 kDa subunit a isoform 1	Atp6v0a1
1786300000	1466000000	1654800000		1072600000	1273100000	1273700000		1786598210	1466298210	1655098210		1072898210	1273398210	1273998210		1635998210	1.20676e+09		0.737632	0.0199943				Cytochrome c oxidase subunit 1	mt-Co1;Mtco1
34777000	61959000	99505000		48319000	24271000	71952000		35075210	62257210	99803210		48617210	24569210	72250210		6.57119e+07	4.84789e+07		0.737749	0.500106				RNA-binding protein 28	Rbm28
133040000	185140000	168670000		142530000	89734000	126690000		133338210	185438210	168968210		142828210	90032210	126988210		1.62582e+08	1.1995e+08		0.737781	0.123848				Xanthine dehydrogenase/oxidase;Xanthine dehydrogenase;Xanthine oxidase	Xdh
1106900000	1248300000	944260000		876740000	834070000	723530000		1107198210	1248598210	944558210		877038210	834368210	723828210		1100118210	8.11745e+08		0.737871	0.0435465				Sepiapterin reductase	Spr
35304000	24156000	37407000		36772000	0	34490000		35602210	24454210	37705210		37070210	298210	34788210		32587210	24052210		0.738087	0.534883				Phosphatidylinositol 3,4,5-trisphosphate 3-phosphatase and dual-specificity protein phosphatase PTEN	Pten
19461000	16352000	14444000		13761000	0	23106000		19759210	16650210	14742210		14059210	298210	23404210		1.70505e+07	12587210		0.738229	0.551211					Dmrtc1a
1689200000	2173300000	2309500000		1459500000	1751100000	1345800000		1689498210	2173598210	2309798210		1459798210	1751398210	1346098210		2.05763e+09	1519098210		0.738275	0.0736723				Choline transporter-like protein 2	Slc44a2
8159100000	8628500000	8108100000		5564100000	6208200000	6607400000		8159398210	8628798210	8108398210		5564398210	6208498210	6607698210		8.29886e+09	6.12686e+09		0.738277	0.00329214				3-hydroxyacyl-CoA dehydrogenase type-2	Hsd17b10
23854000	16912000	14411000		0	24176000	16329000		24152210	17210210	14709210		298210	24474210	16627210		1.86905e+07	1.37999e+07		0.738335	0.557918				Fatty acid 2-hydroxylase	Fa2h
808560000	960000000	1148700000		687490000	701370000	767960000		808858210	960298210	1148998210		687788210	701668210	768258210		972718210	719238210		0.739411	0.0669079					Kctd14
200830000	180660000	166510000		184140000	117700000	103230000		201128210	180958210	166808210		184438210	117998210	103528210		1.82965e+08	1.35322e+08		0.739604	0.1504					Mtx3
194270000	217750000	195650000		201600000	72744000	174940000		194568210	218048210	195948210		201898210	73042210	175238210		2.02855e+08	1.5006e+08		0.739738	0.257344				SWI/SNF-related matrix-associated actin-dependent regulator of chromatin subfamily B member 1	Smarcb1
662230000	414470000	354580000		375550000	391190000	291840000		662528210	414768210	354878210		375848210	391488210	292138210		4.77392e+08	353158210		0.739766	0.278216				Endoplasmic reticulum-Golgi intermediate compartment protein 1	Ergic1
314970000	309040000	344440000		268740000	197640000	250540000		315268210	309338210	344738210		269038210	197938210	250838210		3.23115e+08	2.39272e+08		0.740515	0.0249432				Peroxisomal N(1)-acetyl-spermine/spermidine oxidase	Paox
16498000	8593300	14078000		9850000	9853400	9094800		16796210	8891510	14376210		10148210	10151610	9393010		1.33546e+07	9897610		0.741136	0.21554				Probable ATP-dependent DNA helicase HFM1	Hfm1
7744500	13493000	8435600		0	9339500	12423000		8042710	13791210	8733810		298210	9637710	12721210		1.01892e+07	7.55238e+06		0.741211	0.559803				Nuclear receptor coactivator 7	Ncoa7
12882000	13862000	12557000		13095000	8088300	7716900		13180210	14160210	12855210		13393210	8386510	8015110		1.33985e+07	9931610		0.741246	0.122958				Protein fuzzy homolog	Fuz
180540000	112000000	112600000		70893000	131980000	97232000		180838210	112298210	112898210		71191210	132278210	97530210		1.35345e+08	100333210		0.741315	0.291179				Homeodomain-interacting protein kinase 4	Hipk4
1087400000	1182600000	897370000		819100000	759210000	769600000		1087698210	1182898210	897668210		819398210	759508210	769898210		1056088210	7.82935e+08		0.741354	0.0334835				ADP-ribosylation factor-like protein 8A	Arl8a
189350000	189380000	216190000		131710000	158380000	150870000		189648210	189678210	216488210		132008210	158678210	151168210		1.98605e+08	1.47285e+08		0.741597	0.0127297				O-acetyl-ADP-ribose deacetylase 1	Oard1
36271000000	36770000000	38921000000		27881000000	27795000000	27358000000		36271298210	36770298210	38921298210		27881298210	27795298210	27358298210		3.7321e+10	27678298210		0.741629	0.000312226				Aldehyde dehydrogenase, mitochondrial	Aldh2
152410000	168070000	153360000		108510000	124090000	118620000		152708210	168368210	153658210		108808210	124388210	118918210		1.58245e+08	1.17372e+08		0.741708	0.00390024				Ribose-phosphate pyrophosphokinase 2	Prps2
3518100000	3132000000	4267400000		2894200000	2755300000	2453700000		3518398210	3132298210	4267698210		2894498210	2755598210	2453998210		3.63946e+09	2.70136e+09		0.742242	0.0586702				Mitochondrial amidoxime reducing component 2	2002-03-01
73409000	22010000	53560000		23490000	44715000	42150000		73707210	22308210	53858210		23788210	45013210	42448210		4.99579e+07	37083210		0.74229	0.476116				DNA polymerase iota	Poli
235620000	241060000	259560000		176960000	158150000	211410000		235918210	241358210	259858210		177258210	158448210	211708210		2.45712e+08	1.82472e+08		0.742625	0.0212459				ATP-binding cassette sub-family A member 1	Abca1
26527000	29803000	31779000		19435000	22321000	23458000		26825210	30101210	32077210		19733210	22619210	23756210		2.96679e+07	22036210		0.742763	0.0171651				Coiled-coil domain-containing protein 160	Ccdc160
3160400000	3570000000	3724600000		2321000000	2641700000	2807100000		3160698210	3570298210	3724898210		2321298210	2641998210	2807398210		3485298210	2.59023e+09		0.743188	0.0153971				Medium-chain specific acyl-CoA dehydrogenase, mitochondrial	Acadm
14299000	65827000	0		59360000	0	0		14597210	66125210	298210		59658210	298210	298210		2.70069e+07	2.00849e+07		0.743695	0.817717				Formin-like protein 3	Fmnl3
1682800000	3114000000	2155800000		1522700000	1827600000	1820500000		1683098210	3114298210	2156098210		1522998210	1827898210	1820798210		2.31783e+09	1723898210		0.743755	0.241904				Thymosin beta-4;Hematopoietic system regulatory peptide	Tmsb4x;Tmsb15a
31098000	33019000	44316000		22367000	32345000	25720000		31396210	33317210	44614210		22665210	32643210	26018210		3.64425e+07	2.71089e+07		0.74388	0.13881					Cfap43
79458000	63903000	48699000		32961000	50041000	59677000		79756210	64201210	48997210		33259210	50339210	59975210		64318210	4.78579e+07		0.74408	0.236374				E3 ubiquitin-protein ligase RNF6	Rnf6
78224000	55199000	65767000		52745000	40596000	54649000		78522210	55497210	66065210		53043210	40894210	54947210		6.66949e+07	49628210		0.744108	0.0991801				Galactosylgalactosylxylosylprotein 3-beta-glucuronosyltransferase 3	B3gat3
168560000	164440000	156210000		98828000	127500000	137650000		168858210	164738210	156508210		99126210	127798210	137948210		163368210	121624210		0.744479	0.026589				Pre-rRNA-processing protein TSR2 homolog	Tsr2
88902000	88109000	87362000		71985000	48797000	75870000		89200210	88407210	87660210		72283210	49095210	76168210		8.84225e+07	6.58489e+07		0.744707	0.0559658				Vacuolar protein sorting-associated protein 8 homolog	Vps8
130410000	141740000	138020000		90867000	118640000	95742000		130708210	142038210	138318210		91165210	118938210	96040210		1.37022e+08	1.02048e+08		0.744758	0.0189979				Ethanolamine kinase 2	Etnk2
88696000	60294000	55212000		32778000	68771000	50311000		88994210	60592210	55510210		33076210	69069210	50609210		6.83655e+07	50918210		0.744793	0.301357				39S ribosomal protein L18, mitochondrial	Mrpl18
191310000	173320000	167810000		114390000	134270000	147670000		191608210	173618210	168108210		114688210	134568210	147968210		177778210	132408210		0.744794	0.0193801				DDB1- and CUL4-associated factor 11	Dcaf11
321560000	114250000	241420000		139910000	147340000	217180000		321858210	114548210	241718210		140208210	147638210	217478210		2.26042e+08	1.68442e+08		0.74518	0.426781				Thioredoxin domain-containing protein 2	Txndc2	regulation of fibrous sheath assembly
1391000000	1259700000	1162900000		840450000	992770000	1008600000		1391298210	1259998210	1163198210		840748210	993068210	1008898210		1271498210	9.47572e+08		0.74524	0.0190008				Farnesyl pyrophosphate synthase	Fdps
1213200000	1180100000	1311100000		970020000	869500000	922300000		1213498210	1180398210	1311398210		970318210	869798210	922598210		1235098210	9.20905e+08		0.745613	0.0030126				Leukocyte elastase inhibitor A	Serpinb1a
70114000	77743000	66434000		50822000	48590000	60202000		70412210	78041210	66732210		51120210	48888210	60500210		7.17285e+07	5.35029e+07		0.745908	0.0201197				Piezo-type mechanosensitive ion channel component;Piezo-type mechanosensitive ion channel component 1	Piezo1
20318000	4482900	8102800		9990200	10421000	3920200		20616210	4781110	8401010		10288410	10719210	4218410		11266110	8.40868e+06		0.746369	0.613869				Prostaglandin F2 receptor negative regulator	Ptgfrn
899390000	1020200000	992500000		651530000	808400000	713530000		899688210	1020498210	992798210		651828210	808698210	713828210		9.70995e+08	7.24785e+08		0.746435	0.0135568				Large subunit GTPase 1 homolog	Lsg1
1021300000	999190000	1028300000		738990000	758150000	779070000		1021598210	999488210	1028598210		739288210	758448210	779368210		1.01656e+09	7.59035e+08		0.746669	5.94169e-05				Transmembrane emp24 domain-containing protein 3	Tmed3
136950000	154100000	201830000		117550000	146220000	104330000		137248210	154398210	202128210		117848210	146518210	104628210		1.64592e+08	122998210		0.747294	0.144995				Carboxypeptidase N subunit 2	Cpn2
145370000	160990000	218340000		105220000	144250000	142500000		145668210	161288210	218638210		105518210	144548210	142798210		175198210	1.30955e+08		0.747467	0.158698				EF-hand calcium-binding domain-containing protein 10	Efcab10
145880000	128150000	54778000		69760000	65199000	110630000		146178210	128448210	55076210		70058210	65497210	110928210		1.09901e+08	82161210		0.747594	0.426967				E3 ubiquitin-protein ligase HACE1	Hace1
229460000	237800000	192530000		112240000	176430000	204550000		229758210	238098210	192828210		112538210	176728210	204848210		220228210	1.64705e+08		0.747883	0.144339				Parathymosin	Ptms
1183500000	958310000	983430000		842810000	827860000	666920000		1183798210	958608210	983728210		843108210	828158210	667218210		1.04204e+09	7.79495e+08		0.748043	0.0445074				Glutathione S-transferase A3	Gsta3
182020000	189070000	149770000		149150000	67490000	172780000		182318210	189368210	150068210		149448210	67788210	173078210		173918210	1.30105e+08		0.748081	0.26836				Ubiquitin domain-containing protein 1;Ubiquitin domain-containing protein 2	Ubtd1;Ubtd2
317710000	253870000	141120000		164640000	123030000	245300000		318008210	254168210	141418210		164938210	123328210	245598210		2.37865e+08	1.77955e+08		0.748134	0.394629				Procollagen-lysine,2-oxoglutarate 5-dioxygenase 3	Plod3
40423000	57958000	71482000		42864000	43028000	40967000		40721210	58256210	71780210		43162210	43326210	41265210		56919210	4.25845e+07		0.748158	0.187025					Tubgcp6
200580000	260300000	209600000		204090000	58002000	239390000		200878210	260598210	209898210		204388210	58300210	239688210		2.23792e+08	1.67459e+08		0.748281	0.390476				Protein RMD5 homolog A	Rmnd5a
483320000	424250000	431780000		305320000	326020000	371020000		483618210	424548210	432078210		305618210	326318210	371318210		446748210	334418210		0.748561	0.0138701					Tex264
85136000	82920000	130760000		64168000	81952000	77501000		85434210	83218210	131058210		64466210	82250210	77799210		9.99035e+07	7.48385e+07		0.749108	0.202932				Calcineurin subunit B type 1	Ppp3r1
1722100000	1827400000	2002000000		1235500000	1510400000	1412700000		1722398210	1827698210	2002298210		1235798210	1510698210	1412998210		1850798210	1386498210		0.749135	0.0154607				Cystatin-B	Cstb
56359000	35250000	47786000		37634000	26494000	40094000		56657210	35548210	48084210		37932210	26792210	40392210		46763210	3.50389e+07		0.749283	0.189295				SH2 domain-containing protein 4A	Sh2d4a
49784000	46720000	39450000		36693000	35304000	29653000		50082210	47018210	39748210		36991210	35602210	29951210		45616210	3.41815e+07		0.749329	0.0379067				RNA-binding motif, single-stranded-interacting protein 1	Rbms1
4002400000	4105500000	5153600000		3603100000	2632500000	3703400000		4002698210	4105798210	5153898210		3603398210	2632798210	3703698210		4420798210	3313298210		0.74948	0.0919495				Calcium-binding mitochondrial carrier protein SCaMC-3	Slc25a23
91505000	99667000	117310000		37264000	107490000	86314000		91803210	99965210	117608210		37562210	107788210	86612210		1.03126e+08	7.73209e+07		0.749774	0.308726				Rhophilin-2	Rhpn2
24531000	24919000	29731000		34151000	24997000	0		24829210	25217210	30029210		34449210	25295210	298210		2.66919e+07	20014210		0.749824	0.553663				N-alpha-acetyltransferase 10	Naa10
2799400000	3195000000	2426200000		1934200000	2066800000	2317000000		2799698210	3195298210	2426498210		1934498210	2067098210	2317298210		2.80716e+09	2106298210		0.750329	0.0479331				Purine nucleoside phosphorylase	Pnp
1043000000	841020000	1183500000		832320000	666120000	803190000		1043298210	841318210	1183798210		832618210	666418210	803488210		1.0228e+09	767508210		0.750396	0.0845068				Fructose-2,6-bisphosphatase TIGAR	9630033F20Rik;Tigar
3099300000	3510700000	3920200000		2688700000	2690200000	2529600000		3099598210	3510998210	3920498210		2688998210	2690498210	2529898210		3.51036e+09	2.63646e+09		0.751052	0.0228004				BTB/POZ domain-containing protein KCTD12	Kctd12
25745000	39337000	37986000		24379000	22092000	30721000		26043210	39635210	38284210		24677210	22390210	31019210		34654210	2.60289e+07		0.751103	0.161856				Coiled-coil domain-containing protein 38	Ccdc38
291000000	359850000	379800000		259050000	207000000	308140000		291298210	360148210	380098210		259348210	207298210	308438210		343848210	2.58362e+08		0.751383	0.097628				Glycine cleavage system H protein, mitochondrial	Gcsh
1196000000	1103400000	913960000		765040000	873970000	776230000		1196298210	1103698210	914258210		765338210	874268210	776528210		1071418210	805378210		0.751694	0.041616				NADH dehydrogenase [ubiquinone] 1 beta subcomplex subunit 4	Ndufb4
37885000	61201000	49355000		41664000	25297000	44408000		38183210	61499210	49653210		41962210	25595210	44706210		4.97785e+07	37421210		0.751754	0.241435				Ankyrin repeat and IBR domain-containing protein 1	Ankib1
277950000	197780000	192790000		224040000	117520000	160880000		278248210	198078210	193088210		224338210	117818210	161178210		223138210	167778210		0.751903	0.252579
132390000	84713000	106110000		92292000	70423000	80107000		132688210	85011210	106408210		92590210	70721210	80405210		1.08036e+08	8.12389e+07		0.751962	0.152059				Anoctamin-6	Ano6
38807000	30101000	0		45162000	6458800	0		39105210	30399210	298210		45460210	6757010	298210		2.32675e+07	1.75051e+07		0.752342	0.769308				COUP transcription factor 2;COUP transcription factor 1	Nr2f2;Nr2f1
36028000	46079000	26119000		22343000	22365000	36509000		36326210	46377210	26417210		22641210	22663210	36807210		3.63735e+07	2.73705e+07		0.752485	0.293278				Neutral alpha-glucosidase C	Ganc
39351000	83617000	0		33315000	33395000	25622000		39649210	83915210	298210		33613210	33693210	25920210		4.12875e+07	3.10755e+07		0.752661	0.695773				Vesicle-associated membrane protein 2	Vamp2
38394000	107530000	37269000		15462000	89680000	32522000		38692210	107828210	37567210		15760210	89978210	32820210		6.13625e+07	46186210		0.752678	0.662969				Beta-glucuronidase	Gusb
102260000	88817000	77861000		72856000	59364000	70211000		102558210	89115210	78159210		73154210	59662210	70509210		89944210	67775210		0.753525	0.0534248				RAC-gamma serine/threonine-protein kinase	Akt3
61432000	50433000	53069000		43599000	40033000	40478000		61730210	50731210	53367210		43897210	40331210	40776210		55276210	41668210		0.753818	0.0177234				Cullin-7	Cul7
1039000000	984320000	1202700000		671890000	771030000	988870000		1039298210	984618210	1202998210		672188210	771328210	989168210		1075638210	8.10895e+08		0.753873	0.0815078				Peroxisomal membrane protein PMP34	Slc25a17
325040000	596390000	178480000		156740000	348960000	323550000		325338210	596688210	178778210		157038210	349258210	323848210		3.66935e+08	2.76715e+08		0.754125	0.544655				p53 and DNA damage-regulated protein 1	Pdrg1
414780000	403230000	683910000		401540000	218080000	512990000		415078210	403528210	684208210		401838210	218378210	513288210		500938210	3.77835e+08		0.754254	0.382852				Zinc transporter ZIP10	Slc39a10
83131000	87131000	51200000		55636000	34140000	77066000		83429210	87429210	51498210		55934210	34438210	77364210		7.41189e+07	55912210		0.754359	0.339871				Protein SGT1 homolog	Ecd
55687000	70016000	53779000		64618000	44776000	25847000		55985210	70314210	54077210		64916210	45074210	26145210		6.01255e+07	4.53785e+07		0.75473	0.29707				Pleckstrin homology domain-containing family F member 2	Plekhf2
98834000	90678000	92792000		75532000	60955000	76465000		99132210	90976210	93090210		75830210	61253210	76763210		9.43995e+07	71282210		0.755112	0.0143841				Peroxisome biogenesis factor 1	Pex1
285170000	347740000	310580000		226090000	245770000	240620000		285468210	348038210	310878210		226388210	246068210	240918210		3.14795e+08	2.37792e+08		0.755386	0.0157125				Chloride channel protein;H(+)/Cl(-) exchange transporter 7	Clcn7
366360000	233800000	251200000		206390000	165990000	270520000		366658210	234098210	251498210		206688210	166288210	270818210		2.84085e+08	214598210		0.755402	0.24885				Charged multivesicular body protein 6	Chmp6
1255400000	1007800000	1125300000		947110000	731460000	885620000		1255698210	1008098210	1125598210		947408210	731758210	885918210		1129798210	855028210		0.756797	0.0459085
7732900	0	8489700		5635400	6427500	0		8031110	298210	8787910		5933610	6725710	298210		5.70574e+06	4.31918e+06		0.756988	0.703				Amyloid protein-binding protein 2	Appbp2
753300000	754650000	841110000		607650000	579180000	591360000		753598210	754948210	841408210		607948210	579478210	591658210		783318210	593028210		0.757072	0.00324089				TBC1 domain family member 9B	Tbc1d9b
218530000	222810000	253430000		189120000	188420000	148580000		218828210	223108210	253728210		189418210	188718210	148878210		231888210	1.75672e+08		0.75757	0.0315503				Neuropathy target esterase	Pnpla6
6554600000	7529400000	7840400000		4390300000	5362700000	6872500000		6554898210	7529698210	7840698210		4390598210	5362998210	6872798210		7.30843e+09	5.54213e+09		0.75832	0.0973788				4-trimethylaminobutyraldehyde dehydrogenase	Aldh9a1
32901000	45401000	39845000		38652000	50730000	0		33199210	45699210	40143210		38950210	51028210	298210		3.96805e+07	30092210		0.758362	0.574873				1-acyl-sn-glycerol-3-phosphate acyltransferase epsilon	Agpat5
62953000	66392000	67542000		53821000	58982000	36308000		63251210	66690210	67840210		54119210	59280210	36606210		65927210	5.00019e+07		0.758441	0.0852098				Protein spinster homolog 1	Spns1
1436400000	1050200000	1476800000		1206300000	699800000	1099800000		1436698210	1050498210	1477098210		1206598210	700098210	1100098210		1.32143e+09	1.00226e+09		0.758469	0.195473				NADH dehydrogenase [ubiquinone] iron-sulfur protein 8, mitochondrial	Ndufs8
3852100000	4975900000	5305400000		4070800000	3318400000	3334900000		3852398210	4976198210	5305698210		4071098210	3318698210	3335198210		4.71143e+09	3574998210		0.758792	0.087635				Ferritin heavy chain;Ferritin heavy chain, N-terminally processed	Fth1
1419100000	1828600000	1645800000		1025100000	1324500000	1363700000		1419398210	1828898210	1646098210		1025398210	1324798210	1363998210		1.63146e+09	1.23806e+09		0.758867	0.0692899				Plastin-2	Lcp1
333820000	374890000	347030000		398390000	297440000	105180000		334118210	375188210	347328210		398688210	297738210	105478210		3.52212e+08	2.67302e+08		0.758923	0.383585				Beta-centractin	Actr1b
19251000	38538000	110880000		88121000	39685000	0		19549210	38836210	111178210		88419210	39983210	298210		56521210	42900210		0.759011	0.736659				Complement C1s-A subcomponent;Complement C1s-A subcomponent heavy chain;Complement C1s-A subcomponent light chain	C1s1;C1sa
237990000	140290000	126760000		98702000	132040000	152410000		238288210	140588210	127058210		99000210	132338210	152708210		1.68645e+08	1.28016e+08		0.759084	0.349446				39S ribosomal protein L53, mitochondrial	Mrpl53
795230000	845720000	793300000		553340000	618640000	676320000		795528210	846018210	793598210		553638210	618938210	676618210		8.11715e+08	616398210		0.759378	0.00775695				E3 ubiquitin-protein ligase HERC2	Herc2
2490000000	2329100000	2598300000		2103000000	1820000000	1711500000		2490298210	2329398210	2598598210		2103298210	1820298210	1711798210		2.47276e+09	1.87846e+09		0.759662	0.0133645				LIM and SH3 domain protein 1	Lasp1
2658400000	909600000	578100000		338380000	685520000	2126100000		2658698210	909898210	578398210		338678210	685818210	2126398210		1.38233e+09	1050298210		0.759802	0.714772				Carbonic anhydrase 3	Ca3
100580000	80503000	79048000		54931000	71501000	71002000		100878210	80801210	79346210		55229210	71799210	71300210		8.70085e+07	6.61095e+07		0.759805	0.0769801				Oxysterol-binding protein	Osbpl7
5371300000	5757400000	4934000000		3610000000	5008000000	3589500000		5371598210	5757698210	4934298210		3610298210	5008298210	3589798210		5.35453e+09	4.06946e+09		0.760004	0.0710669				Cytochrome c, somatic	Cycs;Gm10108
68654000	49948000	90248000		34425000	62493000	61665000		68952210	50246210	90546210		34723210	62791210	61963210		6.99149e+07	53159210		0.760342	0.322349				Ankyrin repeat domain-containing protein 49	Ankrd49
3607400000	3884900000	4380500000		3043600000	2899100000	3089200000		3607698210	3885198210	4380798210		3043898210	2899398210	3089498210		3957898210	3.01093e+09		0.76074	0.015353				Membrane-associated progesterone receptor component 1	Pgrmc1
301260000	264090000	303800000		202130000	184130000	274810000		301558210	264388210	304098210		202428210	184428210	275108210		2.90015e+08	2.20655e+08		0.76084	0.0856584				Protein cereblon	Crbn
341850000	248420000	284530000		188220000	161910000	315460000		342148210	248718210	284828210		188518210	162208210	315758210		291898210	2.22162e+08		0.761093	0.271067				Protein canopy homolog 2	Cnpy2
17800000000	21577000000	19241000000		13847000000	15032000000	15757000000		17800298210	21577298210	19241298210		13847298210	15032298210	15757298210		1.95396e+10	1.4879e+10		0.761476	0.0194505				Tubulin beta-3 chain	Tubb3
1580100000	1673200000	1778100000		1129000000	1418300000	1285000000		1580398210	1673498210	1778398210		1129298210	1418598210	1285298210		1.67743e+09	1.27773e+09		0.761719	0.0168734				Neudesin	Nenf
311970000	321680000	258740000		224650000	211660000	243460000		312268210	321978210	259038210		224948210	211958210	243758210		2.97762e+08	226888210		0.76198	0.0306064				Transmembrane anterior posterior transformation protein 1	Tapt1
340100000	312090000	362380000		199110000	301780000	272490000		340398210	312388210	362678210		199408210	302078210	272788210		338488210	2.58092e+08		0.762483	0.0762477				Seipin	Bscl2
33675000	24471000	26655000		19711000	15476000	29264000		33973210	24769210	26953210		20009210	15774210	29562210		28565210	2.17819e+07		0.762532	0.241116					1700042B14Rik;Gm16390;Gm4937
690230000	647150000	863540000		513200000	375330000	789880000		690528210	647448210	863838210		513498210	375628210	790178210		733938210	559768210		0.762691	0.277472					Gapdh
33890000	0	35594000		16262000	0	36528000		34188210	298210	35892210		16560210	298210	36826210		2.34595e+07	1.78949e+07		0.762797	0.740658				Multidrug resistance-associated protein 7	Abcc10
143460000	155490000	162010000		138130000	79659000	133620000		143758210	155788210	162308210		138428210	79957210	133918210		1.53952e+08	1.17435e+08		0.762802	0.135219					Wdr63		IAD IC IC140
301320000	290660000	262590000		225310000	220680000	205700000		301618210	290958210	262888210		225608210	220978210	205998210		2.85155e+08	217528210		0.762842	0.00646872				FXYD domain-containing ion transport regulator 6	Fxyd6
1440900000	1950200000	1792600000		1314600000	1093600000	1546400000		1441198210	1950498210	1792898210		1314898210	1093898210	1546698210		1728198210	1318498210		0.762932	0.109081				Beta-1,3-glucosyltransferase	B3galtl
881790000	1559200000	1022100000		881400000	974260000	786800000		882088210	1559498210	1022398210		881698210	974558210	787098210		1.15466e+09	881118210		0.763097	0.269168				Isoamyl acetate-hydrolyzing esterase 1 homolog	Iah1
1303400000	1200800000	1103700000		820620000	907980000	1025000000		1303698210	1201098210	1103998210		820918210	908278210	1025298210		1.20293e+09	9.18165e+08		0.763273	0.0261541				Hydroxymethylglutaryl-CoA lyase, mitochondrial	Hmgcl
371850000	246890000	275260000		212600000	249160000	220820000		372148210	247188210	275558210		212898210	249458210	221118210		298298210	2.27825e+08		0.763749	0.14826					2610020H08Rik
1627300000	1418800000	1680700000		1130100000	1253100000	1227000000		1627598210	1419098210	1680998210		1130398210	1253398210	1227298210		1575898210	1203698210		0.763817	0.0134926				1-acyl-sn-glycerol-3-phosphate acyltransferase gamma	Agpat3
1367500000	1640800000	1406900000		955540000	1281000000	1136500000		1367798210	1641098210	1407198210		955838210	1281298210	1136798210		1.47203e+09	1.12464e+09		0.764009	0.0522022				Beta-galactosidase-1-like protein 3	Glb1l3
583470000	555120000	586480000		444940000	529300000	344310000		583768210	555418210	586778210		445238210	529598210	344608210		5.75322e+08	4.39815e+08		0.764468	0.0674038				Threonine synthase-like 2	Thnsl2
58717000	0	0		0	0	44712000		59015210	298210	298210		298210	298210	45010210		1.98705e+07	15202210		0.765063	0.858736				Claudin-3	Cldn3
98297000	116590000	80419000		85031000	56328000	84435000		98595210	116888210	80717210		85329210	56626210	84733210		9.87335e+07	7.55629e+07		0.765321	0.17558				Liprin-beta-2	Ppfibp2
152020000	190060000	158870000		109470000	145010000	128700000		152318210	190358210	159168210		109768210	145308210	128998210		1.67282e+08	1.28025e+08		0.765326	0.065307				V-type proton ATPase 116 kDa subunit a isoform 2	Atp6v0a2
1511400000	1674300000	1499600000		1094600000	1178600000	1315400000		1511698210	1674598210	1499898210		1094898210	1178898210	1315698210		1.56206e+09	1196498210		0.765972	0.0129146				Anti-Muellerian hormone type-2 receptor	Amhr2
57964000	54993000	61143000		40042000	48649000	44474000		58262210	55291210	61441210		40340210	48947210	44772210		5.83315e+07	4.46865e+07		0.766079	0.0110953				Cysteine sulfinic acid decarboxylase	Csad
126810000	59461000	112940000		0	110640000	118400000		127108210	59759210	113238210		298210	110938210	118698210		100035210	7.66449e+07		0.766179	0.61854				28S ribosomal protein S15, mitochondrial	Mrps15
172150000	140860000	141710000		73184000	114240000	160810000		172448210	141158210	142008210		73482210	114538210	161108210		1.51872e+08	116376210		0.766281	0.26375				UPF0705 protein C11orf49 homolog
1659200000	1344600000	1372800000		1121600000	1119900000	1113100000		1659498210	1344898210	1373098210		1121898210	1120198210	1113398210		1.45916e+09	1118498210		0.766533	0.0275633				Peptidyl-prolyl cis-trans isomerase FKBP5;Peptidyl-prolyl cis-trans isomerase FKBP5, N-terminally processed;Peptidyl-prolyl cis-trans isomerase	Fkbp5
64138000	52423000	60366000		57234000	32631000	45736000		64436210	52721210	60664210		57532210	32929210	46034210		5.92739e+07	4.54985e+07		0.767599	0.15622				Nitrogen permease regulator 3-like protein	Nprl3
146660000	116400000	125550000		92222000	105920000	100070000		146958210	116698210	125848210		92520210	106218210	100368210		1.29835e+08	99702210		0.767915	0.0371124				Ribosome-releasing factor 2, mitochondrial	Gfm2
106310000	101660000	88061000		93136000	84089000	49904000		106608210	101958210	88359210		93434210	84387210	50202210		98975210	7.60079e+07		0.767949	0.182496				Serine/threonine-protein kinase RIO3	Riok3
0	148800000	115090000		88330000	52885000	61327000		298210	149098210	115388210		88628210	53183210	61625210		8.82615e+07	67812210		0.76831	0.681531				Cdc42 effector protein 5	Cdc42ep5
143100000	315390000	466340000		185740000	129780000	395210000		143398210	315688210	466638210		186038210	130078210	395508210		3.08575e+08	237208210		0.768722	0.594244				NAD(P)H dehydrogenase [quinone] 1	Nqo1
396630000	464610000	458930000		319870000	343250000	351520000		396928210	464908210	459228210		320168210	343548210	351818210		4.40355e+08	3.38512e+08		0.768724	0.0127616				Valacyclovir hydrolase	Bphl
314860000	271640000	302650000		234210000	212330000	237010000		315158210	271938210	302948210		234508210	212628210	237308210		2.96682e+08	228148210		0.769	0.0103764				1,2-dihydroxy-3-keto-5-methylthiopentene dioxygenase	Adi1
69505000	55328000	68677000		46669000	50571000	51469000		69803210	55626210	68975210		46967210	50869210	51767210		6.48015e+07	4.98679e+07		0.769548	0.0363807				COMM domain-containing protein 5	Commd5
241240000	267660000	260400000		195120000	147450000	250300000		241538210	267958210	260698210		195418210	147748210	250598210		2.56732e+08	1.97922e+08		0.770928	0.128315				tRNA (adenine(58)-N(1))-methyltransferase non-catalytic subunit TRM6	Trmt6
578840000	566260000	598610000		393050000	449300000	501770000		579138210	566558210	598908210		393348210	449598210	502068210		5.81535e+08	448338210		0.770957	0.0152949				Partner of Y14 and mago	Wibg
98519000	141060000	133650000		93224000	102260000	92056000		98817210	141358210	133948210		93522210	102558210	92354210		1.24708e+08	9.61449e+07		0.770961	0.102027				Integrin beta;Integrin beta-5	Itgb5
36398000	40091000	41986000		31098000	28911000	31137000		36696210	40389210	42284210		31396210	29209210	31435210		3.97899e+07	30680210		0.771056	0.00714853				Cyclin-dependent kinase 20	Cdk20
180850000	235180000	246170000		190390000	98571000	221600000		181148210	235478210	246468210		190688210	98869210	221898210		2.21032e+08	170485210		0.771316	0.295982				Zinc finger protein-like 1	Zfpl1
103350000	81765000	76121000		76560000	63155000	61586000		103648210	82063210	76419210		76858210	63453210	61884210		8.73769e+07	6.73985e+07		0.771354	0.104892				Poly(A) RNA polymerase, mitochondrial	Mtpap
667920000	577280000	595630000		418060000	467460000	534250000		668218210	577578210	595928210		418358210	467758210	534548210		613908210	4.73555e+08		0.771377	0.0322533				Delta-1-pyrroline-5-carboxylate dehydrogenase, mitochondrial	Aldh4a1
383300000	426630000	277730000		305090000	236150000	297740000		383598210	426928210	278028210		305388210	236448210	298038210		3.62852e+08	279958210		0.77155	0.168148					Skiv2l
308150000	291310000	273580000		236600000	211790000	225110000		308448210	291608210	273878210		236898210	212088210	225408210		2.91312e+08	224798210		0.771676	0.00564403				UDP-glucose 4-epimerase	Gale
162440000	178380000	150680000		107900000	117230000	154130000		162738210	178678210	150978210		108198210	117528210	154428210		1.64132e+08	126718210		0.772053	0.0825571				E3 ubiquitin-protein ligase TM129	Tmem129
3497200000	3989900000	3818900000		2884500000	3031500000	2814300000		3497498210	3990198210	3819198210		2884798210	3031798210	2814598210		3.76896e+09	2910398210		0.772201	0.00556179				Espin	Espn
31888000	55473000	39806000		20773000	30590000	46634000		32186210	55771210	40104210		21071210	30888210	46932210		42687210	3.29639e+07		0.772219	0.396061				Putative monooxygenase p33MONOX	4833439L19Rik;P33monox
15435000	14803000	19229000		15627000	22377000	0		15733210	15101210	19527210		15925210	22675210	298210		16787210	12966210		0.772386	0.602603				TOM1-like protein 1	Tom1l1
0	22012000	30109000		18761000	21298000	0		298210	22310210	30407210		19059210	21596210	298210		1.76719e+07	13651210		0.772482	0.738341				Golgi phosphoprotein 3-like	Golph3l
154890000	147300000	126320000		115360000	112410000	103070000		155188210	147598210	126618210		115658210	112708210	103368210		1.43135e+08	110578210		0.772546	0.0249858				WASH complex subunit FAM21	Fam21
227620000	193570000	13890000		195890000	140120000	0		227918210	193868210	14188210		196188210	140418210	298210		1.45325e+08	1.12302e+08		0.772762	0.727298					Eef1d
175740000	172070000	232030000		145680000	141550000	160710000		176038210	172368210	232328210		145978210	141848210	161008210		193578210	1.49612e+08		0.772874	0.0957795				FAST kinase domain-containing protein 2	Fastkd2
144310000	119080000	104530000		86107000	80012000	118050000		144608210	119378210	104828210		86405210	80310210	118348210		122938210	95021210		0.772918	0.167075				Solute carrier family 2, facilitated glucose transporter member 1	Slc2a1
267500000	63662000	87789000		113460000	146010000	64142000		267798210	63960210	88087210		113758210	146308210	64440210		1.39949e+08	1.08169e+08		0.772919	0.667108				Protein 4.1	Epb4.1;Epb41
27057000	8083700	12000000		0	36276000	0		27355210	8381910	12298210		298210	36574210	298210		1.60118e+07	12390210		0.773819	0.800382				Multidrug resistance protein 1A	Abcb1a
35411000	76909000	60181000		39430000	59745000	34174000		35709210	77207210	60479210		39728210	60043210	34472210		5.77985e+07	4.47479e+07		0.774204	0.414729				Acyl-coenzyme A thioesterase 2, mitochondrial	Acot2
111740000	87081000	81120000		76437000	63656000	76452000		112038210	87379210	81418210		76735210	63954210	76750210		9.36119e+07	7.24799e+07		0.774259	0.109395				WD repeat-containing protein 81	Wdr81
155530000	152080000	128230000		97357000	157890000	82027000		155828210	152378210	128528210		97655210	158188210	82325210		145578210	1.12723e+08		0.774311	0.254213				Golgi SNAP receptor complex member 1	Gosr1
74799000	69167000	155400000		50405000	74288000	107060000		75097210	69465210	155698210		50703210	74586210	107358210		1.00087e+08	77549210		0.774819	0.52417				Vacuolar protein sorting-associated protein 13B	Vps13b
17996000	18189000	20807000		13646000	8500800	21837000		18294210	18487210	21105210		13944210	8799010	22135210		1.92955e+07	1.49595e+07		0.775281	0.337998				Ribonucleoside-diphosphate reductase subunit M2	Rrm2
507160000	512980000	418450000		346080000	350900000	418460000		507458210	513278210	418748210		346378210	351198210	418758210		479828210	3.72112e+08		0.77551	0.0488807				Testis development-related protein	Tdrp
58797000	53458000	67813000		46757000	31774000	60936000		59095210	53756210	68111210		47055210	32072210	61234210		6.03209e+07	46787210		0.775639	0.223512					Upf3a
2511100000	2010300000	1916800000		1804200000	1556000000	1635600000		2511398210	2010598210	1917098210		1804498210	1556298210	1635898210		2.14636e+09	1.66556e+09		0.775993	0.0725741				Cytochrome b-c1 complex subunit 6, mitochondrial	Uqcrh
179450000	115020000	102880000		91445000	124290000	92430000		179748210	115318210	103178210		91743210	124588210	92728210		132748210	1.0302e+08		0.776055	0.318186				Macrosialin	Cd68
259830000	278120000	214470000		99274000	153140000	331360000		260128210	278418210	214768210		99572210	153438210	331658210		2.51105e+08	1.9489e+08		0.776128	0.482176				Intraflagellar transport protein 122 homolog	Ift122
113190000	78728000	70089000		67967000	60277000	74910000		113488210	79026210	70387210		68265210	60575210	75208210		8.76339e+07	68016210		0.776141	0.228961					Gm13103;Gm13088
52814000	85329000	60266000		54485000	46334000	53003000		53112210	85627210	60564210		54783210	46632210	53301210		6.64345e+07	51572210		0.776286	0.216933				Ubiquilin-1	Ubqln1
19527000	13974000	15429000		8946900	15826000	13020000		19825210	14272210	15727210		9245110	16124210	13318210		16608210	1.28958e+07		0.776474	0.22629				Ankyrin repeat and BTB/POZ domain-containing protein 2	Abtb2
122380000	136950000	167450000		100520000	132600000	98085000		122678210	137248210	167748210		100818210	132898210	98383210		142558210	1.107e+08		0.776524	0.13971				Disks large-associated protein 4	Dlgap4
617200000	506330000	476400000		418680000	361940000	461620000		617498210	506628210	476698210		418978210	362238210	461918210		533608210	414378210		0.776559	0.0821594				Aspartate--tRNA ligase, mitochondrial	Dars2
12636000	0	0		9613400	0	0		12934210	298210	298210		9911610	298210	298210		4510210	3.50268e+06		0.776611	0.858288				Kinesin-like protein KIF22	Kif22
39812000	49596000	33033000		25231000	35432000	34257000		40110210	49894210	33331210		25529210	35730210	34555210		4.11119e+07	31938210		0.776861	0.18813				Ribonuclease P protein subunit p40	Rpp40
69456000	45756000	63511000		45083000	40769000	52825000		69754210	46054210	63809210		45381210	41067210	53123210		5.98725e+07	4.65239e+07		0.777049	0.168222				Retinoblastoma-like protein 1	Rbl1
1067300000	881350000	954110000		808670000	618290000	829000000		1067598210	881648210	954408210		808968210	618588210	829298210		9.67885e+08	7.52285e+08		0.777246	0.0666785				CDP-diacylglycerol--inositol 3-phosphatidyltransferase	Cdipt
96719000	100730000	105720000		41783000	91566000	102090000		97017210	101028210	106018210		42081210	91864210	102388210		1.01355e+08	7.87779e+07		0.777251	0.295588				Serine/threonine-protein phosphatase 2A regulatory subunit B subunit delta	Ppp2r3d
1023000000	828040000	688720000		741950000	613430000	619370000		1023298210	828338210	689018210		742248210	613728210	619668210		8.46885e+08	658548210		0.777612	0.149089				Ubiquinone biosynthesis protein COQ9, mitochondrial	Coq9
43907000	32770000	33046000		35721000	18063000	31372000		44205210	33068210	33344210		36019210	18361210	31670210		3.68725e+07	2.86835e+07		0.777911	0.273353				Solute carrier family 12 member 2	Slc12a2
58841000	69847000	73454000		58018000	33491000	65556000		59139210	70145210	73752210		58316210	33789210	65854210		6.76789e+07	52653210		0.777986	0.230418					Tardbp
271700000	258230000	224310000		159480000	257400000	169770000		271998210	258528210	224608210		159778210	257698210	170068210		2.51712e+08	195848210		0.778066	0.176884				DDB1- and CUL4-associated factor 6	Dcaf6
53625000	39497000	99628000		46976000	47929000	54885000		53923210	39795210	99926210		47274210	48227210	55183210		64548210	50228210		0.77815	0.47817				Vacuolar protein sorting-associated protein 41 homolog	Vps41
64240000	48372000	54619000		67868000	32795000	29288000		64538210	48670210	54917210		68166210	33093210	29586210		5.60419e+07	43615210		0.778261	0.398281				Condensin complex subunit 2	Ncaph
32432000	46138000	34316000		28151000	39468000	20047000		32730210	46436210	34614210		28449210	39766210	20345210		3.79269e+07	29520210		0.778345	0.300726				TP53-regulated inhibitor of apoptosis 1	Triap1
1131700000	1039000000	985570000		763750000	759500000	933290000		1131998210	1039298210	985868210		764048210	759798210	933588210		1052388210	8.19145e+08		0.778368	0.0308865				Lanosterol synthase	Lss
102200000	102100000	90069000		69645000	70180000	89110000		102498210	102398210	90367210		69943210	70478210	89408210		98421210	7.66099e+07		0.778388	0.0448252				Neuralized-like protein 4	Neurl4
78342000	51301000	79680000		63473000	42505000	56771000		78640210	51599210	79978210		63771210	42803210	57069210		7.00725e+07	5.45479e+07		0.778449	0.235241				Acetyl-CoA carboxylase 2;Biotin carboxylase	Acacb
114920000	138280000	127510000		90691000	120740000	84851000		115218210	138578210	127808210		90989210	121038210	85149210		1.27202e+08	9.90589e+07		0.778755	0.0964924				Protein AMBP;Alpha-1-microglobulin;Inter-alpha-trypsin inhibitor light chain;Trypstatin	Ambp
254100000	376130000	343660000		221500000	341430000	195440000		254398210	376428210	343958210		221798210	341728210	195738210		324928210	253088210		0.778905	0.28249				Ceramide synthase 5	Cers5
25777000	0	0		0	19884000	0		26075210	298210	298210		298210	20182210	298210		8.89054e+06	6926210		0.779054	0.865156				Tetratricopeptide repeat protein 39A	Ttc39a
2688800000	3044300000	3189500000		1971000000	2102900000	2877900000		2689098210	3044598210	3189798210		1971298210	2103198210	2878198210		2974498210	2.31756e+09		0.779145	0.109013				Alkyldihydroxyacetonephosphate synthase, peroxisomal	Agps
3270400000	3918100000	3936800000		2883100000	2858700000	2927400000		3270698210	3918398210	3937098210		2883398210	2858998210	2927698210		3.70873e+09	2.89003e+09		0.779251	0.0204514				Electron transfer flavoprotein-ubiquinone oxidoreductase, mitochondrial	Etfdh
50270000	55078000	44711000		36952000	47195000	32729000		50568210	55376210	45009210		37250210	47493210	33027210		5.03179e+07	3.92569e+07		0.780178	0.10221				Tensin-3	Tns3
45588000	33734000	47007000		25115000	39235000	34027000		45886210	34032210	47305210		25413210	39533210	34325210		4.24079e+07	3.30905e+07		0.780292	0.188883				Ciliary neurotrophic factor receptor subunit alpha	Cntfr
195400000	225420000	283370000		165140000	204820000	179380000		195698210	225718210	283668210		165438210	205118210	179678210		235028210	1.83412e+08		0.780381	0.142298				Glutaredoxin-1	Glrx
244040000	186340000	249560000		91340000	198540000	240580000		244338210	186638210	249858210		91638210	198838210	240878210		2.26945e+08	177118210		0.780446	0.365076				High affinity copper uptake protein 1	Slc31a1
200290000	221010000	201760000		145980000	146880000	193260000		200588210	221308210	202058210		146278210	147178210	193558210		2.07985e+08	162338210		0.780529	0.0547507				Geranylgeranyl transferase type-2 subunit beta	Rabggtb
442790000	501130000	416150000		355190000	358850000	347380000		443088210	501428210	416448210		355488210	359148210	347678210		4.53655e+08	3.54105e+08		0.78056	0.0170813				Fatty-acid amide hydrolase 1	Faah
77106000	65752000	84095000		47775000	54551000	74633000		77404210	66050210	84393210		48073210	54849210	74931210		75949210	5.92845e+07		0.780581	0.160079				Notchless protein homolog 1	Nle1
80810000	116320000	103490000		35451000	47970000	151080000		81108210	116618210	103788210		35749210	48268210	151378210		1.00505e+08	78465210		0.78071	0.593748				Methionine--tRNA ligase, mitochondrial	Mars2
167450000	143210000	169520000		120300000	136500000	117960000		167748210	143508210	169818210		120598210	136798210	118258210		160358210	125218210		0.780866	0.0266789				Superoxide dismutase [Cu-Zn];Extracellular superoxide dismutase [Cu-Zn]	Sod3
1475300000	1526500000	1705400000		1209700000	1129100000	1338400000		1475598210	1526798210	1705698210		1209998210	1129398210	1338698210		1.56936e+09	1.22603e+09		0.781228	0.0207158				Flavin reductase (NADPH)	Blvrb
47289000	35833000	21243000		34850000	0	46497000		47587210	36131210	21541210		35148210	298210	46795210		3.50865e+07	2.74139e+07		0.781322	0.654078				Short coiled-coil protein	Scoc
77407000	66426000	79775000		65543000	40538000	68464000		77705210	66724210	80073210		65841210	40836210	68762210		74834210	5.84799e+07		0.781459	0.169445				Apolipoprotein C-III	Apoc3
295220000	242930000	285800000		189170000	250720000	203830000		295518210	243228210	286098210		189468210	251018210	204128210		274948210	2.14872e+08		0.781498	0.0707861				NADH dehydrogenase [ubiquinone] 1 alpha subcomplex subunit 3	Ndufa3
79477000	60563000	41271000		57221000	46595000	37783000		79775210	60861210	41569210		57519210	46893210	38081210		60735210	4.74979e+07		0.782048	0.345131				Surfeit locus protein 1	Surf1
360200000	363570000	390970000		218080000	305460000	348060000		360498210	363868210	391268210		218378210	305758210	348358210		371878210	2.90832e+08		0.782061	0.109325				AH receptor-interacting protein	Aip
12058000000	12504000000	13168000000		8483300000	10910000000	10116000000		12058298210	12504298210	13168298210		8483598210	10910298210	10116298210		1.2577e+10	9.83673e+09		0.782123	0.0249801				4F2 cell-surface antigen heavy chain	Slc3a2
97332000	66527000	42393000		40251000	55149000	65723000		97630210	66825210	42691210		40549210	55447210	66021210		6.90489e+07	5.40059e+07		0.78214	0.439232				E3 ubiquitin-protein ligase RNF34	Rnf34
102300000	85422000	104420000		64192000	89892000	74334000		102598210	85720210	104718210		64490210	90190210	74632210		9.76789e+07	7.64375e+07		0.782539	0.0911408				Mitochondrial import inner membrane translocase subunit TIM14	Dnajc19
1189300000	1443300000	1533000000		1261100000	976280000	1022200000		1189598210	1443598210	1533298210		1261398210	976578210	1022498210		1.38883e+09	1.08682e+09		0.782546	0.0898992				Long-chain fatty acid transport protein 1	Slc27a1
116360000	92870000	131190000		77026000	79271000	110070000		116658210	93168210	131488210		77324210	79569210	110368210		1.13772e+08	89087210		0.783036	0.184906				Retinol dehydrogenase 13	Rdh13
5443600000	6222500000	5788900000		4473600000	4777500000	4417900000		5443898210	6222798210	5789198210		4473898210	4777798210	4418198210		5.81863e+09	4.55663e+09		0.783111	0.00739813				Glucosamine-6-phosphate isomerase 1	Gnpda1
55516000	35033000	36071000		37248000	30900000	30817000		55814210	35331210	36369210		37546210	31198210	31115210		4.25049e+07	3.32865e+07		0.783123	0.257884				Syntaxin-16	Stx16
2022700000	1998900000	2003600000		1391000000	1735900000	1591400000		2022998210	1999198210	2003898210		1391298210	1736198210	1591698210		2008698210	1.57306e+09		0.783127	0.012206				Dehydrogenase/reductase SDR family member 7	Dhrs7
393560000	481510000	545270000		358900000	366190000	388010000		393858210	481808210	545568210		359198210	366488210	388308210		4.73745e+08	3.71332e+08		0.783822	0.0844214				Alpha-N-acetylgalactosaminidase	Naga
2378600000	2938600000	2796900000		1949300000	2294900000	2115900000		2378898210	2938898210	2797198210		1949598210	2295198210	2116198210		2704998210	2.12033e+09		0.783857	0.0403069				5-oxoprolinase	Oplah
22272000	18902000	24217000		14680000	14277000	22108000		22570210	19200210	24515210		14978210	14575210	22406210		22095210	1.73199e+07		0.783875	0.184536				Arfaptin-2	Arfip2
1236100000	1473600000	1133400000		1042900000	1054200000	915770000		1236398210	1473898210	1133698210		1043198210	1054498210	916068210		1.28133e+09	1004588210		0.784019	0.0657849				Cyclin-dependent kinase 7	Cdk7
19018000	21347000	18462000		20254000	6935400	18753000		19316210	21645210	18760210		20552210	7233610	19051210		19907210	1.56123e+07		0.784256	0.374756				Ceramide-1-phosphate transfer protein	Cptp
346140000	261380000	292730000		252160000	216170000	237780000		346438210	261678210	293028210		252458210	216468210	238078210		3.00382e+08	235668210		0.784563	0.0736304				DNA-dependent protein kinase catalytic subunit	Prkdc
165360000	169290000	155310000		107510000	128060000	148670000		165658210	169588210	155608210		107808210	128358210	148968210		163618210	128378210		0.784621	0.0488581				2,3-cyclic-nucleotide 3-phosphodiesterase	Cnp
3763700000	4325900000	3481900000		2766300000	3115000000	3200200000		3763998210	4326198210	3482198210		2766598210	3115298210	3200498210		3.85746e+09	3.02746e+09		0.784833	0.0419709				Acetyl-CoA acetyltransferase, cytosolic	Acat2
431690000	723180000	716960000		623250000	407520000	438920000		431988210	723478210	717258210		623548210	407818210	439218210		6.24242e+08	4.90195e+08		0.785265	0.317075				Unconventional myosin-Vb	Myo5b
11075000	0	25593000		0	28609000	0		11373210	298210	25891210		298210	28907210	298210		1.25209e+07	9.83454e+06		0.785452	0.834872				Guanine nucleotide-binding protein G(I)/G(S)/G(O) subunit gamma-2	Gng2
460630000	391130000	390620000		305910000	241780000	428320000		460928210	391428210	390918210		306208210	242078210	428618210		4.14425e+08	3.25635e+08		0.785751	0.209622				Scavenger receptor class B member 1	Scarb1
530730000	406370000	392750000		325340000	302170000	417350000		531028210	406668210	393048210		325638210	302468210	417648210		4.43582e+08	3.48585e+08		0.785842	0.166537				28S ribosomal protein S27, mitochondrial	Mrps27
7622200000	8403600000	5955000000		3637500000	5498600000	8137200000		7622498210	8403898210	5955298210		3637798210	5498898210	8137498210		7.32723e+09	5.75806e+09		0.785845	0.352212				Dynein heavy chain 8, axonemal	Dnah8	OADα
1051700000	911550000	1112600000		762640000	878730000	775780000		1051998210	911848210	1112898210		762938210	879028210	776078210		1.02558e+09	8.06015e+08		0.78591	0.0348521				Enoyl-CoA delta isomerase 2, mitochondrial	Eci2
28452000	20590000	16624000		0	30347000	21084000		28750210	20888210	16922210		298210	30645210	21382210		2.21869e+07	1.74419e+07		0.786135	0.647973				Bactericidal permeability-increasing protein	Bpi
22748000	27643000	30366000		17281000	15371000	30683000		23046210	27941210	30664210		17579210	15669210	30981210		27217210	2.14099e+07		0.78663	0.335379				B-cell CLL/lymphoma 7 protein family member B	Bcl7b
101210000	48452000	45457000		51622000	50295000	51382000		101508210	48750210	45755210		51920210	50593210	51680210		6.53379e+07	5.13979e+07		0.786647	0.4844				DNA-directed RNA polymerase III subunit RPC2	Polr3b
419720000	416200000	404700000		281000000	303320000	391740000		420018210	416498210	404998210		281298210	303618210	392038210		413838210	3.25652e+08		0.786905	0.0610093				Stromal cell-derived factor 2	Sdf2
1278200000	1184600000	1223500000		1007700000	927240000	966140000		1278498210	1184898210	1223798210		1007998210	927538210	966438210		1.22906e+09	9.67325e+08		0.787041	0.00184811				Diphosphoinositol polyphosphate phosphohydrolase 1	Nudt3
0	17760000	8100800		6643600	13523000	0		298210	18058210	8399010		6941810	13821210	298210		8.91848e+06	7020410		0.787176	0.783164				Ciliogenesis-associated TTC17-interacting protein	Catip
18014000	22762000	49574000		16127000	30190000	24668000		18312210	23060210	49872210		16425210	30488210	24966210		3.04149e+07	2.39599e+07		0.787768	0.576896				Insulin-like growth factor-binding protein 7	Igfbp7
249030000	350490000	219890000		269170000	168320000	208670000		249328210	350788210	220188210		269468210	168618210	208968210		2.73435e+08	2.15685e+08		0.788798	0.306021				Transmembrane protein 254	Tmem254b;Tmem254
5113900000	6335800000	6609400000		4639300000	5222700000	4384200000		5114198210	6336098210	6609698210		4639598210	5222998210	4384498210		6019998210	4.74903e+09		0.788876	0.0717664				Inosine triphosphate pyrophosphatase	Itpa
108620000	129620000	146420000		94334000	104420000	104530000		108918210	129918210	146718210		94632210	104718210	104828210		128518210	1.01393e+08		0.788938	0.0768157				Pleckstrin homology domain-containing family G member 5	Plekhg5
57474000	56515000	76004000		72569000	0	77166000		57772210	56813210	76302210		72867210	298210	77464210		63629210	5.02099e+07		0.789101	0.63022				ER membrane protein complex subunit 10	Emc10
277960000	167340000	204080000		149390000	203890000	159030000		278258210	167638210	204378210		149688210	204188210	159328210		216758210	171068210		0.789212	0.280051				Protein FAM173A	Fam173a
2526800000	2513700000	2991000000		2362500000	2159100000	1818100000		2527098210	2513998210	2991298210		2362798210	2159398210	1818398210		2.67746e+09	2.11353e+09		0.789378	0.0649746				Acid ceramidase;Acid ceramidase subunit alpha;Acid ceramidase subunit beta	Asah1
43310000	62631000	57408000		61449000	67317000	0		43608210	62929210	57706210		61747210	67615210	298210		5.47479e+07	43220210		0.789441	0.632287				1-phosphatidylinositol 4,5-bisphosphate phosphodiesterase delta-3;Phosphoinositide phospholipase C	Plcd3
398240000	513880000	498650000		360620000	368020000	385320000		398538210	514178210	498948210		360918210	368318210	385618210		4.70555e+08	371618210		0.789745	0.0556041				Protein NDRG1	Ndrg1
68143000	90095000	65714000		53151000	50693000	72878000		68441210	90393210	66012210		53449210	50991210	73176210		7.49489e+07	5.92055e+07		0.789946	0.206768				AP-4 complex subunit epsilon-1	Ap4e1
171270000	128420000	143580000		118560000	104650000	126800000		171568210	128718210	143878210		118858210	104948210	127098210		1.48055e+08	116968210		0.790033	0.092359				Glycerol-3-phosphate dehydrogenase;Glycerol-3-phosphate dehydrogenase, mitochondrial	Gpd2
28767000	48090000	38738000		0	44372000	46764000		29065210	48388210	39036210		298210	44670210	47062210		3.88299e+07	3.06769e+07		0.790033	0.641148				Major urinary proteins 11 and 8;Major urinary protein 2;Major urinary protein 1;Major urinary protein 6;Major urinary protein 17	Mup11;Mup14;Mup7;Mup1;Mup15;Mup6;Mup13;Mup10;Mup4;Mup8;Mup9;Mup19;Mup2;Mup17
392940000	522170000	388120000		304640000	360180000	364740000		393238210	522468210	388418210		304938210	360478210	365038210		434708210	3.43485e+08		0.79015	0.129954				SH3 domain-binding glutamic acid-rich-like protein 2;SH3 domain-binding glutamic acid-rich-like protein	Sh3bgrl2
75775000	73456000	85255000		51379000	62683000	71083000		76073210	73754210	85553210		51677210	62981210	71381210		78460210	62013210		0.790378	0.0715768				Solute carrier family 22 member 21;Solute carrier family 22 member 5	Slc22a21;Slc22a5
1187300000	1468100000	1656100000		1299700000	1161100000	948570000		1187598210	1468398210	1656398210		1299998210	1161398210	948868210		1.43746e+09	1.13675e+09		0.790805	0.152069				Tubulin alpha chain-like 3	Tubal3
12481000	0	17488000		0	12904000	10613000		12779210	298210	17786210		298210	13202210	10911210		1.02879e+07	8137210		0.790951	0.758944				Ribosomal protein S6 kinase alpha-4	Rps6ka4
142260000	61818000	54517000		58630000	68773000	76958000		142558210	62116210	54815210		58928210	69071210	77256210		8.64965e+07	6.84185e+07		0.790997	0.56172				Cerebral cavernous malformations protein 2 homolog	Ccm2
5457400000	5136400000	8837000000		4328600000	5787700000	5254600000		5457698210	5136698210	8837298210		4328898210	5787998210	5254898210		6.47723e+09	5.12393e+09		0.791068	0.342623				Acyl-CoA-binding protein	Dbi
7481600000	8001000000	8271300000		6760900000	6110500000	5932200000		7481898210	8001298210	8271598210		6761198210	6110798210	5932498210		7.91826e+09	6.26816e+09		0.791608	0.00851187				S-(hydroxymethyl)glutathione dehydrogenase;Alcohol dehydrogenase class-3	Adh5
3271800000	3324300000	4035900000		2677900000	2780900000	2958100000		3272098210	3324598210	4036198210		2678198210	2781198210	2958398210		3544298210	2.80593e+09		0.791675	0.046691				ADP-ribosylation factor-like protein 8B	Arl8b
449820000	205900000	224940000		177240000	215950000	304260000		450118210	206198210	225238210		177538210	216248210	304558210		2.93852e+08	2.32782e+08		0.792174	0.520853				AP complex subunit beta;AP-4 complex subunit beta-1	Ap4b1
844510000	780430000	839570000		562330000	672030000	718220000		844808210	780728210	839868210		562628210	672328210	718518210		8.21802e+08	651158210		0.792355	0.027992				Protein NDRG2	Ndrg2
193050000	185700000	233330000		141540000	178130000	165240000		193348210	185998210	233628210		141838210	178428210	165538210		2.04325e+08	1.61935e+08		0.792536	0.0811796				Uncharacterized protein CXorf49 homolog
33849000	26851000	30947000		23992000	27187000	21281000		34147210	27149210	31245210		24290210	27485210	21579210		30847210	2.44515e+07		0.792666	0.0734345				Transmembrane and coiled-coil domains protein 1	Tmcc1
90671000	95752000	120490000		84638000	53908000	104590000		90969210	96050210	120788210		84936210	54206210	104888210		1.02603e+08	8.13435e+07		0.792802	0.288425				Ragulator complex protein LAMTOR5	Lamtor5
15776000	0	123270000		43688000	30786000	35581000		16074210	298210	123568210		43986210	31084210	35879210		4.66469e+07	36983210		0.792834	0.816095
358660000	384050000	359580000		290740000	299540000	283660000		358958210	384348210	359878210		291038210	299838210	283958210		367728210	2.91612e+08		0.793008	0.00131546				DmX-like protein 2	Dmxl2
162430000	144540000	141590000		137330000	101510000	116700000		162728210	144838210	141888210		137628210	101808210	116998210		149818210	1.18812e+08		0.793038	0.0646283				Histone chaperone ASF1A	Asf1a
1323700000	1309800000	1205000000		1111500000	992340000	940120000		1323998210	1310098210	1205298210		1111798210	992638210	940418210		1279798210	1.01495e+09		0.793056	0.0136919				Secretory carrier-associated membrane protein 2	Scamp2
201660000	226530000	236860000		194830000	172170000	160640000		201958210	226828210	237158210		195128210	172468210	160938210		2.21982e+08	176178210		0.793662	0.0341552				Citrate lyase subunit beta-like protein, mitochondrial	Clybl
10013000000	6251300000	17608000000		6552200000	6271800000	14073000000		10013298210	6251598210	17608298210		6552498210	6272098210	14073298210		1.12911e+10	8.96596e+09		0.794076	0.60977				Hemoglobin subunit beta-2	Hbb-b2
557520000	552810000	574240000		452160000	475160000	410250000		557818210	553108210	574538210		452458210	475458210	410548210		5.61822e+08	4.46155e+08		0.794122	0.00450829				Nucleoside diphosphate-linked moiety X motif 19, mitochondrial	Nudt19
138700000	110430000	148380000		83399000	106850000	125260000		138998210	110728210	148678210		83697210	107148210	125558210		1.32802e+08	1.05468e+08		0.794177	0.17547				N-alpha-acetyltransferase 20	Naa20
46000000	95403000	61709000		81707000	29909000	49584000		46298210	95701210	62007210		82005210	30207210	49882210		68002210	5.40315e+07		0.794556	0.541954				Hippocampus abundant transcript 1 protein	Hiat1
380140000	305910000	231510000		247750000	202660000	278530000		380438210	306208210	231808210		248048210	202958210	278828210		3.06152e+08	243278210		0.794633	0.262344				DNA repair endonuclease XPF	Ercc4
858070000	771520000	868350000		672430000	701640000	611700000		858368210	771818210	868648210		672728210	701938210	611998210		8.32945e+08	6.62222e+08		0.795036	0.0135885				Monoacylglycerol lipase ABHD6	Abhd6
706560000	720070000	683710000		482910000	621970000	572940000		706858210	720368210	684008210		483208210	622268210	573238210		7.03745e+08	5.59572e+08		0.795134	0.0266298				Signal transducing adapter molecule 2	Stam2
381290000	305650000	317960000		277540000	259300000	262240000		381588210	305948210	318258210		277838210	259598210	262538210		3.35265e+08	266658210		0.795366	0.0465773				Chromosome transmission fidelity protein 8 homolog isoform 2	Chtf8
1130100000	1185300000	1236800000		835400000	1036700000	953040000		1130398210	1185598210	1237098210		835698210	1036998210	953338210		1.18436e+09	9.42012e+08		0.795373	0.021369				Dihydropyrimidinase-related protein 5	Dpysl5
1354500000	1465600000	1348500000		1083800000	1084400000	1147400000		1354798210	1465898210	1348798210		1084098210	1084698210	1147698210		1.38983e+09	1105498210		0.795419	0.00283773				Kynurenine--oxoglutarate transaminase 3	Ccbl2
64686000	78202000	63726000		39931000	58132000	66129000		64984210	78500210	64024210		40229210	58430210	66427210		6.91695e+07	5.50289e+07		0.795565	0.19326				COMM domain-containing protein 4	Commd4
2362700000	2749000000	2668200000		1927900000	2338700000	1925400000		2362998210	2749298210	2668498210		1928198210	2338998210	1925698210		2593598210	2064298210		0.795921	0.0429477				2,4-dienoyl-CoA reductase, mitochondrial	Decr1
3454800000	3372500000	3713800000		2727300000	2894100000	2770000000		3455098210	3372798210	3714098210		2727598210	2894398210	2770298210		3513998210	2.79743e+09		0.796082	0.00330964				Carnitine O-palmitoyltransferase 1, liver isoform	Cpt1a
31583000000	33180000000	32959000000		24429000000	27229000000	26196000000		31583298210	33180298210	32959298210		24429298210	27229298210	26196298210		32574298210	2.59516e+10		0.79669	0.0022978				NADP-dependent malic enzyme;Malic enzyme	Me1
973920000	951570000	1011800000		643940000	913960000	783220000		974218210	951868210	1012098210		644238210	914258210	783518210		9.79395e+08	7.80672e+08		0.797096	0.0677318				Ubiquitin-conjugating enzyme E2 Z	Ube2z
93947000	78739000	87867000		63215000	77990000	66303000		94245210	79037210	88165210		63513210	78288210	66601210		87149210	6.94675e+07		0.79711	0.0486363				Cytoplasmic protein NCK2	Nck2
106430000	85369000	59940000		63025000	75660000	61837000		106728210	85667210	60238210		63323210	75958210	62135210		84211210	6.71389e+07		0.797268	0.29407				Kelch domain-containing protein 3	Klhdc3
260640000	283320000	299600000		238550000	218120000	216170000		260938210	283618210	299898210		238848210	218418210	216468210		2.81485e+08	224578210		0.797834	0.0131041				Transmembrane protein 184A	Tmem184a
67492000	58816000	69549000		46299000	66316000	43486000		67790210	59114210	69847210		46597210	66614210	43784210		6.55839e+07	5.23319e+07		0.797938	0.168922				Phospholipid-transporting ATPase;Probable phospholipid-transporting ATPase IIA;Probable phospholipid-transporting ATPase IIB	Atp9a;Atp9b
49647000	46597000	48673000		31509000	42896000	41071000		49945210	46895210	48971210		31807210	43194210	41369210		4.86039e+07	38790210		0.798089	0.0544729				Derlin-3	Derl3
154000000	91188000	119190000		85269000	82264000	123100000		154298210	91486210	119488210		85567210	82562210	123398210		1.21758e+08	9.71759e+07		0.79811	0.334502				Putative protein arginine N-methyltransferase 9	Prmt10;Prmt9
169500000	139860000	161860000		99841000	134600000	141570000		169798210	140158210	162158210		100139210	134898210	141868210		1.57372e+08	125635210		0.798335	0.112789				IQ domain-containing protein G	Iqcg
835690000	1043900000	998150000		713070000	842520000	741700000		835988210	1044198210	998448210		713368210	842818210	741998210		9.59545e+08	7.66062e+08		0.798359	0.0599643				Embigin	Emb
185930000	207080000	189030000		187740000	99259000	177690000		186228210	207378210	189328210		188038210	99557210	177988210		1.94312e+08	1.55195e+08		0.798689	0.245076				Coiled-coil domain-containing protein 117	Ccdc117
1431300000	1267500000	1425300000		1109700000	1145000000	1039000000		1431598210	1267798210	1425598210		1109998210	1145298210	1039298210		1374998210	1098198210		0.798691	0.011137				Equilibrative nucleoside transporter 1	Slc29a1
91493000	150220000	136240000		126820000	33799000	141260000		91791210	150518210	136538210		127118210	34097210	141558210		1.26283e+08	1.00925e+08		0.799196	0.541567					Snx21
89796000	89646000	86863000		57175000	70610000	84895000		90094210	89944210	87161210		57473210	70908210	85193210		8.90665e+07	7.11915e+07		0.799307	0.0908386				Transmembrane protein 263	Tmem263
107540000	52289000	69381000		89210000	47254000	46567000		107838210	52587210	69679210		89508210	47552210	46865210		7.67015e+07	6.13085e+07		0.799313	0.51501				Complex I intermediate-associated protein 30, mitochondrial	Ndufaf1
77382000	84857000	76639000		80017000	43634000	67142000		77680210	85155210	76937210		80315210	43932210	67440210		79924210	6.38959e+07		0.799456	0.217779				Thioredoxin domain-containing protein 16	Txndc16
432930000	476930000	592130000		457900000	368770000	374020000		433228210	477228210	592428210		458198210	369068210	374318210		5.00962e+08	400528210		0.799519	0.144928				Protein transport protein Sec24A	Sec24a
298680000	297870000	325850000		211440000	249780000	276110000		298978210	298168210	326148210		211738210	250078210	276408210		3.07765e+08	2.46075e+08		0.799555	0.0419355				U6 snRNA-associated Sm-like protein LSm1	Lsm1
52991000	29003000	30428000		27801000	32833000	29100000		53289210	29301210	30726210		28099210	33131210	29398210		37772210	3.02095e+07		0.799782	0.393409				E3 ubiquitin-protein ligase RNF185	Rnf185
116220000	112190000	95378000		98773000	104430000	55616000		116518210	112488210	95676210		99071210	104728210	55914210		1.08228e+08	86571210		0.7999	0.264073				Bifunctional arginine demethylase and lysyl-hydroxylase JMJD6	Jmjd6
45376000	43709000	45505000		40482000	28709000	38351000		45674210	44007210	45803210		40780210	29007210	38649210		4.51615e+07	3.61455e+07		0.800361	0.0698243				Diphosphoinositol polyphosphate phosphohydrolase 3-beta;Diphosphoinositol polyphosphate phosphohydrolase 3-alpha	Nudt11;Nudt10
101440000	92915000	81029000		76823000	59632000	83801000		101738210	93213210	81327210		77121210	59930210	84099210		9.20929e+07	7.37169e+07		0.800462	0.119541				Inositol hexakisphosphate and diphosphoinositol-pentakisphosphate kinase 2	Ppip5k2
139770000	130370000	112540000		95915000	117030000	93279000		140068210	130668210	112838210		96213210	117328210	93577210		127858210	1.02373e+08		0.800675	0.0807828				cAMP-responsive element modulator	Crem
708710000	679480000	600880000		430910000	572770000	589450000		709008210	679778210	601178210		431208210	573068210	589748210		6.63322e+08	5.31342e+08		0.801032	0.091629				Perilipin-1	Plin1
595090000	637000000	586960000		417030000	537870000	502340000		595388210	637298210	587258210		417328210	538168210	502638210		606648210	4.86045e+08		0.801197	0.0366716				Peroxisomal carnitine O-octanoyltransferase	Crot
71871000	107450000	54547000		63003000	60098000	64110000		72169210	107748210	54845210		63301210	60396210	64408210		78254210	6.27019e+07		0.801259	0.375704				Telomeric repeat-binding factor 2-interacting protein 1	Terf2ip
54147000	46702000	37605000		21860000	42561000	46368000		54445210	47000210	37903210		22158210	42859210	46666210		4.64495e+07	3.72279e+07		0.801469	0.363087				Protein FAM188B	Fam188b
1837200000	1872200000	2457100000		1679900000	1734000000	1530200000		1837498210	1872498210	2457398210		1680198210	1734298210	1530498210		2055798210	1.64833e+09		0.801796	0.124451				Delta(3,5)-Delta(2,4)-dienoyl-CoA isomerase, mitochondrial	Ech1
80925000	34851000	61780000		59496000	0	82724000		81223210	35149210	62078210		59794210	298210	83022210		5.94835e+07	4.77049e+07		0.801984	0.695867				Arginine-glutamic acid dipeptide repeats protein	Rere
264340000	307720000	244500000		214300000	214500000	226220000		264638210	308018210	244798210		214598210	214798210	226518210		2.72485e+08	218638210		0.802387	0.0477119				Alpha-1,6-mannosyl-glycoprotein 2-beta-N-acetylglucosaminyltransferase	Mgat2
68828000	89657000	87991000		63340000	58100000	76193000		69126210	89955210	88289210		63638210	58398210	76491210		8.24569e+07	6.61759e+07		0.802551	0.130474				Guanine nucleotide-binding protein G(i) subunit alpha-1	Gnai1
62505000	23539000	46591000		35209000	36677000	34401000		62803210	23837210	46889210		35507210	36975210	34699210		4.45099e+07	35727210		0.80268	0.481546				Cyclic AMP-responsive element-binding protein 1	Creb1
246190000	224330000	195120000		167410000	177260000	189770000		246488210	224628210	195418210		167708210	177558210	190068210		222178210	1.78445e+08		0.803161	0.0536178				E3 ubiquitin-protein ligase RNF170	Rnf170
356400000	285780000	295230000		257510000	229200000	266040000		356698210	286078210	295528210		257808210	229498210	266338210		312768210	2.51215e+08		0.803198	0.0678937				Synaptosomal-associated protein;Synaptosomal-associated protein 23	Snap23
1684600000	1563000000	1705700000		1225800000	1483800000	1269300000		1684898210	1563298210	1705998210		1226098210	1484098210	1269598210		1651398210	1326598210		0.803318	0.0236437				Mitochondrial carnitine/acylcarnitine carrier protein	Slc25a20
197940000	212060000	158470000		162130000	98324000	196070000		198238210	212358210	158768210		162428210	98622210	196368210		189788210	1.52473e+08		0.803384	0.319235					Fbxl18
67502000000	65386000000	68474000000		53456000000	55071000000	53255000000		67502298210	65386298210	68474298210		53456298210	55071298210	53255298210		6.7121e+10	5.39276e+10		0.803439	0.000255618				Glutathione S-transferase Mu 2	Gstm2
71515000	41816000	44822000		0	44581000	82332000		71813210	42114210	45120210		298210	44879210	82630210		5.30159e+07	4.26025e+07		0.803581	0.704981				Importin-8	Ipo8
4518400000	3942200000	3910100000		3350600000	3362800000	3229100000		4518698210	3942498210	3910398210		3350898210	3363098210	3229398210		4.12386e+09	3.31446e+09		0.803728	0.0160876				Glia maturation factor beta	Gmfb
489790000	478600000	441180000		401770000	363260000	367760000		490088210	478898210	441478210		402068210	363558210	368058210		4.70155e+08	3.77895e+08		0.803767	0.00841787				Catechol O-methyltransferase	Comt
6713400000	6782500000	7231400000		5785200000	5384300000	5491700000		6713698210	6782798210	7231698210		5785498210	5384598210	5491998210		6909398210	5.55403e+09		0.803837	0.00255854				Cytoplasmic aconitate hydratase	Aco1
124320000	74348000	156310000		84258000	88689000	112290000		124618210	74646210	156608210		84556210	88987210	112588210		118624210	95377210		0.804028	0.411628					Ankrd36
203200000	185280000	224790000		157250000	193250000	142700000		203498210	185578210	225088210		157548210	193548210	142998210		2.04722e+08	164698210		0.804499	0.101264				DnaJ homolog subfamily C member 5	Dnajc5
73777000	79859000	167380000		76062000	78951000	103070000		74075210	80157210	167678210		76360210	79249210	103368210		1.07304e+08	8.63259e+07		0.804502	0.540988				Sestrin-2	Sesn2
87958000	76205000	64689000		61478000	50404000	72056000		88256210	76503210	64987210		61776210	50702210	72354210		76582210	6.16109e+07		0.804506	0.178099				Ubiquitin-protein ligase E3B	Ube3b
3317600000	3349100000	3363800000		2446000000	2903900000	2720100000		3317898210	3349398210	3364098210		2446298210	2904198210	2720398210		3343798210	2690298210		0.804564	0.0081222				Probable threonine protease PRSS50	Prss50
882950000	553810000	593470000		456160000	652460000	524900000		883248210	554108210	593768210		456458210	652758210	525198210		6.77042e+08	5.44805e+08		0.804685	0.327367				Tubby-related protein 2;Tubby-like protein	Tulp2
112400000	83751000	77895000		71544000	61476000	87328000		112698210	84049210	78193210		71842210	61774210	87626210		9.16469e+07	7.37475e+07		0.804692	0.242032				N-acetylgalactosaminyltransferase 7	Galnt7
50686000	65446000	54767000		35183000	33059000	69145000		50984210	65744210	55065210		35481210	33357210	69443210		5.72645e+07	4.60939e+07		0.804929	0.421727				Cysteine and histidine-rich protein 1	Cyhr1
4237900000	3936800000	4415400000		3449000000	3564500000	3123200000		4238198210	3937098210	4415698210		3449298210	3564798210	3123498210		4196998210	3379198210		0.805146	0.0131238				Redox-regulatory protein FAM213A	Fam213a
120010000	171510000	76152000		70998000	106790000	118130000		120308210	171808210	76450210		71296210	107088210	118428210		1.22856e+08	9.89375e+07		0.805316	0.483455				ZW10 interactor	Zwint
67572000	115290000	159060000		0	131860000	143330000		67870210	115588210	159358210		298210	132158210	143628210		114272210	92028210		0.805342	0.696444				Probable hydrolase PNKD	Pnkd
747400000	848220000	815910000		625930000	636980000	679060000		747698210	848518210	816208210		626228210	637278210	679358210		8.04142e+08	6.47622e+08		0.805358	0.00984623				Acyl-CoA-binding domain-containing protein 5	Acbd5
29398000	120860000	87394000		72011000	75628000	43627000		29696210	121158210	87692210		72309210	75926210	43925210		7.95155e+07	6.40535e+07		0.805547	0.617095				Nik-related protein kinase	Nrk
169410000	126270000	127630000		104560000	117210000	119060000		169708210	126568210	127928210		104858210	117508210	119358210		1.41402e+08	113908210		0.805566	0.13824				Density-regulated protein	Denr
588390000	492470000	499040000		425690000	472470000	374490000		588688210	492768210	499338210		425988210	472768210	374788210		5.26932e+08	4.24515e+08		0.805636	0.070985				Ras-related protein Rab-12	Rab12
78793000	73593000	80855000		51192000	73874000	62736000		79091210	73891210	81153210		51490210	74172210	63034210		78045210	6.28989e+07		0.805929	0.0930039				Gamma-glutamylaminecyclotransferase	Ggact
61256000	85090000	51896000		50289000	52160000	57156000		61554210	85388210	52194210		50587210	52458210	57454210		6.63789e+07	5.34999e+07		0.805977	0.270946				UDP-GalNAc:beta-1,3-N-acetylgalactosaminyltransferase 1	B3galnt1
117380000	0	123910000		76192000	44304000	73833000		117678210	298210	124208210		76490210	44602210	74131210		80728210	6.50745e+07		0.806094	0.725471				D-2-hydroxyglutarate dehydrogenase, mitochondrial	D2hgdh
2450600000	2384000000	2205400000		1684600000	1739600000	2251100000		2450898210	2384298210	2205698210		1684898210	1739898210	2251398210		2.34696e+09	1.89206e+09		0.806175	0.0796441				Transmembrane protein 33	Tmem33
781920000	744320000	535420000		466080000	487280000	708770000		782218210	744618210	535718210		466378210	487578210	709068210		687518210	5.54342e+08		0.806294	0.289212				Cyclin-dependent kinases regulatory subunit;Cyclin-dependent kinases regulatory subunit 2	Cks2
979210000	947660000	986220000		739680000	780170000	829570000		979508210	947958210	986518210		739978210	780468210	829868210		971328210	783438210		0.806564	0.00276681				Mitotic spindle assembly checkpoint protein MAD2A	Mad2l1
1059500000	1223600000	1275100000		775730000	1009700000	1085200000		1059798210	1223898210	1275398210		776028210	1009998210	1085498210		1.18636e+09	9.57175e+08		0.806813	0.113813				Sideroflexin-1	Sfxn1
1054700000	1228200000	1182300000		867490000	914470000	1013700000		1054998210	1228498210	1182598210		867788210	914768210	1013998210		1.15536e+09	9.32185e+08		0.806832	0.0297045				60S ribosomal export protein NMD3	Nmd3
1407200000	1591200000	1421300000		1239800000	1031000000	1295600000		1407498210	1591498210	1421598210		1240098210	1031298210	1295898210		1.47353e+09	1189098210		0.806972	0.0465301				Cathepsin B;Cathepsin B light chain;Cathepsin B heavy chain	Ctsb
50508000	7888000	29766000		35885000	35095000	0		50806210	8186210	30064210		36183210	35393210	298210		2.96855e+07	23958210		0.807067	0.754102				Kelch domain-containing protein 4	Klhdc4
55694000	105660000	109910000		60990000	83288000	74574000		55992210	105958210	110208210		61288210	83586210	74872210		9.07195e+07	7.32489e+07		0.807421	0.400229				Phosphatidylinositol 4-kinase beta	Pi4kb
142510000	157740000	184250000		96545000	180770000	113730000		142808210	158038210	184548210		96843210	181068210	114028210		161798210	1.30647e+08		0.807466	0.334912				Inter-alpha-trypsin inhibitor heavy chain H3	Itih3
1264400000	1603600000	1759800000		1148800000	1282200000	1306000000		1264698210	1603898210	1760098210		1149098210	1282498210	1306298210		1542898210	1.24596e+09		0.807548	0.126433				Deoxynucleoside triphosphate triphosphohydrolase SAMHD1	Samhd1
339360000	341820000	346490000		221350000	296480000	311920000		339658210	342118210	346788210		221648210	296778210	312218210		3.42855e+08	2.76882e+08		0.807577	0.0783597				Mitochondrial import receptor subunit TOM6 homolog	Tomm6
2085300000	2053600000	2061000000		1670900000	1551000000	1785300000		2085598210	2053898210	2061298210		1671198210	1551298210	1785598210		2.06693e+09	1.66936e+09		0.807654	0.0043414				Vitamin D-binding protein	Gc
232860000	277720000	275310000		211610000	214940000	208110000		233158210	278018210	275608210		211908210	215238210	208408210		2.62262e+08	2.11852e+08		0.807787	0.0265603				Calcium-binding mitochondrial carrier protein SCaMC-1	Slc25a24
760350000	659830000	704370000		630510000	551530000	534500000		760648210	660128210	704668210		630808210	551828210	534798210		7.08482e+08	572478210		0.808035	0.0305315				NLR family member X1	Nlrx1
4686300000	5516600000	5455400000		4023600000	4284200000	4344500000		4686598210	5516898210	5455698210		4023898210	4284498210	4344798210		5.21973e+09	4.21773e+09		0.808036	0.0244668				Aldehyde dehydrogenase X, mitochondrial	Aldh1b1
18260000000	21599000000	28740000000		17682000000	18972000000	18792000000		18260298210	21599298210	28740298210		17682298210	18972298210	18792298210		2.28666e+10	18482298210		0.808265	0.232306				Tubulin alpha-1A chain	Tuba1a
96589000	89688000	88072000		70972000	70614000	80026000		96887210	89986210	88370210		71270210	70912210	80324210		9.17479e+07	7.41689e+07		0.808399	0.0121223				Gem-associated protein 7	Gemin7
336170000	345760000	233380000		256980000	231680000	251210000		336468210	346058210	233678210		257278210	231978210	251508210		3.05402e+08	2.46922e+08		0.808514	0.186983				Transmembrane protein 70, mitochondrial	Tmem70
0	53461000	0		0	20601000	22486000		298210	53759210	298210		298210	20899210	22784210		1.81185e+07	1.46605e+07		0.809146	0.865969				Torsin-1A-interacting protein 1	Tor1aip1
177130000	286490000	170220000		184060000	187310000	141410000		177428210	286788210	170518210		184358210	187608210	141708210		211578210	1.71225e+08		0.809275	0.375007				Matrix-remodeling-associated protein 7	Mxra7
79614000	86494000	92913000		27637000	74200000	107670000		79912210	86792210	93211210		27935210	74498210	107968210		8.66385e+07	7.01339e+07		0.8095	0.521561				Fibrous sheath-interacting protein 1	Fsip1
368670000	232230000	332790000		400080000	106190000	249480000		368968210	232528210	333088210		400378210	106488210	249778210		311528210	2.52215e+08		0.809605	0.562948				Mitochondrial pyruvate carrier 1	Mpc1
451950000	473120000	466130000		372810000	380500000	373020000		452248210	473418210	466428210		373108210	380798210	373318210		4.64032e+08	3.75742e+08		0.809733	0.000193996				Kelch-like protein 36	Klhl36
101990000	108110000	95826000		106350000	76483000	64773000		102288210	108408210	96124210		106648210	76781210	65071210		1.02274e+08	8.28335e+07		0.809922	0.205604				Phospholipid scramblase 3	Plscr3
100820000	93968000	83523000		48670000	59186000	117410000		101118210	94266210	83821210		48968210	59484210	117708210		9.30685e+07	7.53869e+07		0.810015	0.465871				Mitochondrial import inner membrane translocase subunit Tim10	Timm10
528760000	781210000	562940000		509420000	463740000	543910000		529058210	781508210	563238210		509718210	464038210	544208210		6.24602e+08	505988210		0.810098	0.223469				Plasma protease C1 inhibitor	Serping1
178940000	117290000	237970000		149540000	170080000	112980000		179238210	117588210	238268210		149838210	170378210	113278210		1.78365e+08	144498210		0.810127	0.430204				PDZ domain-containing protein GIPC3	Gipc3
18402000	10616000	16588000		13463000	10149000	13173000		18700210	10914210	16886210		13761210	10447210	13471210		15500210	1.25599e+07		0.810304	0.317991				Pseudopodium-enriched atypical kinase 1	Peak1
41721000	44869000	23902000		30154000	29559000	29662000		42019210	45167210	24200210		30452210	29857210	29960210		3.71289e+07	3.00899e+07		0.810417	0.341757				Ribosome production factor 1	Rpf1
1258600000	1156200000	1190100000		907030000	929210000	1087000000		1258898210	1156498210	1190398210		907328210	929508210	1087298210		1.20193e+09	9.74712e+08		0.810954	0.0239865				Cleft lip and palate transmembrane protein 1 homolog	Clptm1
827740000	986580000	813380000		613160000	752000000	765960000		828038210	986878210	813678210		613458210	752298210	766258210		876198210	7.10672e+08		0.811085	0.0885807				Carboxypeptidase;Lysosomal protective protein;Lysosomal protective protein 32 kDa chain;Lysosomal protective protein 20 kDa chain	Ctsa
11376000	7596800	9918700		7138300	4339700	11793000		11674210	7895010	10216910		7436510	4637910	12091210		9928710	8055210		0.811305	0.484801				AT-rich interactive domain-containing protein 4B	Arid4b
3961900000	3915100000	4268400000		2945600000	3193500000	3715100000		3962198210	3915398210	4268698210		2945898210	3193798210	3715398210		4.04876e+09	3.28503e+09		0.811366	0.0389325				Sterol O-acyltransferase 1	Soat1
40245000	39548000	33382000		29121000	28679000	33866000		40543210	39846210	33680210		29419210	28977210	34164210		38023210	3.08535e+07		0.81144	0.0590562				Survival motor neuron protein	Smn1
121110000	143330000	131090000		106710000	97253000	116900000		121408210	143628210	131388210		107008210	97551210	117198210		1.32142e+08	1.07253e+08		0.811649	0.0439526				Biotinidase	Btd
477020000	476500000	457190000		373760000	402260000	368830000		477318210	476798210	457488210		374058210	402558210	369128210		4.70535e+08	3.81915e+08		0.811661	0.00196342				Alpha-1,2-mannosyltransferase ALG9	Alg9
699060000	1310100000	1520200000		963830000	1241700000	659250000		699358210	1310398210	1520498210		964128210	1241998210	659548210		1.17675e+09	9.55225e+08		0.811747	0.498864				3-oxo-5-beta-steroid 4-dehydrogenase	Akr1d1
4998400000	5632800000	5902800000		4425300000	4104400000	4892700000		4998698210	5633098210	5903098210		4425598210	4104698210	4892998210		5.51163e+09	4.47443e+09		0.811816	0.0422749				Triosephosphate isomerase	Tpi1
10720000000	10931000000	10604000000		8663700000	8344100000	9177500000		10720298210	10931298210	10604298210		8663998210	8344398210	9177798210		1.0752e+10	8.72873e+09		0.811827	0.00149084				Pyruvate carboxylase;Pyruvate carboxylase, mitochondrial	Pcx;Pc
1877200000	2093000000	1906300000		1334700000	1426600000	2009500000		1877498210	2093298210	1906598210		1334998210	1426898210	2009798210		1.95913e+09	1.59056e+09		0.811872	0.17197				Ceramide synthase 3	Cers3
59711000	112690000	114620000		0	91318000	141550000		60009210	112988210	114918210		298210	91616210	141848210		9.59719e+07	7.79209e+07		0.811914	0.709847				Lys-63-specific deubiquitinase BRCC36	Brcc3
437330000	498900000	436010000		293460000	485290000	335230000		437628210	499198210	436308210		293758210	485588210	335528210		4.57712e+08	3.71625e+08		0.811919	0.236227				Stabilin-1	Stab1
344590000	353870000	356680000		296060000	226010000	334580000		344888210	354168210	356978210		296358210	226308210	334878210		3.52012e+08	285848210		0.812042	0.107429				Ubiquitin domain-containing protein UBFD1	Ubfd1
82001000	83242000	100280000		94018000	64050000	57396000		82299210	83540210	100578210		94316210	64348210	57694210		8.88059e+07	7.21195e+07		0.812103	0.259604				Uncharacterized aarF domain-containing protein kinase 1	Adck1
1080900000	1137900000	1092200000		903370000	895400000	890280000		1081198210	1138198210	1092498210		903668210	895698210	890578210		1.10396e+09	896648210		0.812207	0.000313098				Mitochondrial antiviral-signaling protein	Mavs
129650000	102510000	114920000		82890000	110200000	88648000		129948210	102808210	115218210		83188210	110498210	88946210		1.15992e+08	9.42109e+07		0.812222	0.129371				BRCA1-associated protein	Brap
0	14384000	10651000		11547000	8619000	0		298210	14682210	10949210		11845210	8917210	298210		8643210	7020210		0.812223	0.783748				Uncharacterized protein KIAA1143 homolog
791550000	417380000	1203600000		624770000	878320000	456710000		791848210	417678210	1203898210		625068210	878618210	457008210		8.04475e+08	6.53565e+08		0.812412	0.590014				Serum amyloid P-component	Apcs
199750000	133530000	123950000		132540000	103190000	135620000		200048210	133828210	124248210		132838210	103488210	135918210		152708210	1.24082e+08		0.81254	0.332286				Protein phosphatase 1 regulatory subunit 12C	Ppp1r12c
1820400000	1680300000	1742800000		1400500000	1469700000	1390500000		1820698210	1680598210	1743098210		1400798210	1469998210	1390798210		1.74813e+09	1.42053e+09		0.8126	0.00232863				Ubiquitin-associated domain-containing protein 2	Ubac2
288700000	175470000	124150000		181900000	147730000	148310000		288998210	175768210	124448210		182198210	148028210	148608210		1.96405e+08	1.59612e+08		0.812666	0.501861				Inner nuclear membrane protein Man1	Lemd3
1044200000	1087400000	983170000		858020000	914270000	759560000		1044498210	1087698210	983468210		858318210	914568210	759858210		1.03855e+09	844248210		0.812907	0.0233238				Mannose-1-phosphate guanyltransferase alpha	Gmppa
372460000	361660000	357230000		305730000	283150000	298200000		372758210	361958210	357528210		306028210	283448210	298498210		3.64082e+08	2.95992e+08		0.812981	0.00106143				Acyl-CoA dehydrogenase family member 10	Acad10
163220000	93246000	140010000		106400000	160080000	55700000		163518210	93544210	140308210		106698210	160378210	55998210		1.32457e+08	1.07692e+08		0.813031	0.534587				PEX5-related protein	Pex5l
351980000	304020000	436060000		324480000	284370000	279460000		352278210	304318210	436358210		324778210	284668210	279758210		364318210	2.96402e+08		0.813579	0.174104				Neprilysin	Mme
187310000	142690000	137460000		158680000	94862000	126740000		187608210	142988210	137758210		158978210	95160210	127038210		156118210	1.27059e+08		0.813863	0.297473				Activating signal cointegrator 1 complex subunit 2	Ascc2
49353000	31117000	33117000		30739000	32187000	29411000		49651210	31415210	33415210		31037210	32485210	29709210		3.81605e+07	31077210		0.814381	0.29116				SHC-transforming protein 1;SHC-transforming protein 2	Shc1;Shc2
175810000	125150000	107280000		96008000	121540000	114750000		176108210	125448210	107578210		96306210	121838210	115048210		136378210	111064210		0.814384	0.312027				X-linked lymphocyte-regulated protein PM1	Xlr;3830403N18Rik
836860000	630340000	791080000		556620000	590580000	691970000		837158210	630638210	791378210		556918210	590878210	692268210		753058210	6.13355e+08		0.814485	0.134649				Serine/threonine-protein phosphatase 6 regulatory subunit 1	Ppp6r1
23775000	48313000	60103000		0	35926000	71639000		24073210	48611210	60401210		298210	36224210	71937210		4.43619e+07	36153210		0.814961	0.742227				DNA repair and recombination protein RAD54B	Rad54b
15314000	9126300	17950000		0	19021000	15366000		15612210	9424510	18248210		298210	19319210	15664210		14428310	1.17605e+07		0.815102	0.697637				Zinc finger protein 280C;Zinc finger protein 280D	Znf280c;Zfp280d;Zfp280b;Znf280d
1837300000	2527000000	1868100000		1501100000	1982900000	1595900000		1837598210	2527298210	1868398210		1501398210	1983198210	1596198210		2.07776e+09	1693598210		0.815106	0.226322				Aminopeptidase B	Rnpep
173640000	283720000	275410000		201780000	210620000	184740000		173938210	284018210	275708210		202078210	210918210	185038210		2.44555e+08	1.99345e+08		0.815134	0.279752				26S proteasome non-ATPase regulatory subunit 4	Psmd4
50499000	54624000	44727000		29538000	43652000	48794000		50797210	54922210	45025210		29836210	43950210	49092210		50248210	4.09595e+07		0.815144	0.222211				TraB domain-containing protein	Trabd
1400700000	1395200000	1811300000		1309100000	1097300000	1350300000		1400998210	1395498210	1811598210		1309398210	1097598210	1350598210		1.53603e+09	1.25253e+09		0.815433	0.148228				Complement component 1 Q subcomponent-binding protein, mitochondrial	C1qbp
114720000	157650000	134370000		90324000	109140000	132120000		115018210	157948210	134668210		90622210	109438210	132418210		135878210	110826210		0.815629	0.221613				Etoposide-induced protein 2.4	Ei24
1391300000	1475900000	1519500000		1147700000	1250900000	1180900000		1391598210	1476198210	1519798210		1147998210	1251198210	1181198210		1.46253e+09	1.19346e+09		0.816027	0.00512146				Ferrochelatase;Ferrochelatase, mitochondrial	Fech
123720000	117600000	64014000		72328000	66823000	109880000		124018210	117898210	64312210		72626210	67121210	110178210		102076210	8.33085e+07		0.816141	0.465615					Gltscr2
150830000	139970000	127550000		117490000	97820000	126060000		151128210	140268210	127848210		117788210	98118210	126358210		139748210	114088210		0.816384	0.0750333				BH3-interacting domain death agonist;BH3-interacting domain death agonist p15;BH3-interacting domain death agonist p13;BH3-interacting domain death agonist p11	Bid
63561000	76709000	74684000		68557000	62395000	44384000		63859210	77007210	74982210		68855210	62693210	44682210		7.19495e+07	5.87435e+07		0.816455	0.187841				SEC14 domain and spectrin repeat-containing protein 1	Sestd1
8307900000	9021300000	8007900000		6588900000	7247600000	6855300000		8308198210	9021598210	8008198210		6589198210	7247898210	6855598210		8445998210	6.89756e+09		0.816667	0.0121927				Alpha-2-macroglobulin receptor-associated protein	Lrpap1
39370000	45001000	43241000		33351000	0	70708000		39668210	45299210	43539210		33649210	298210	71006210		4.28355e+07	3.49845e+07		0.816718	0.721094				Ras-related protein Rab-3B	Rab3b
158620000	141460000	118680000		110630000	114170000	117070000		158918210	141758210	118978210		110928210	114468210	117368210		1.39885e+08	1.14255e+08		0.816778	0.0939543				Queuine tRNA-ribosyltransferase	Qtrt1
16371000000	19006000000	18925000000		14915000000	15071000000	14367000000		16371298210	19006298210	18925298210		14915298210	15071298210	14367298210		1.8101e+10	1.47846e+10		0.816787	0.0204454				ADP/ATP translocase 2;ADP/ATP translocase 2, N-terminally processed	Slc25a5
51219000	56969000	0		0	31470000	56769000		51517210	57267210	298210		298210	31768210	57067210		3.63609e+07	29711210		0.81712	0.799057				Hsp90 co-chaperone Cdc37-like 1	Cdc37l1
137820000	74056000	111160000		74297000	81550000	108020000		138118210	74354210	111458210		74595210	81848210	108318210		1.07977e+08	8.82539e+07		0.817341	0.403641				TLD domain-containing protein 1	Tldc1
880730000	1046600000	904930000		752090000	848600000	714090000		881028210	1046898210	905228210		752388210	848898210	714388210		9.44385e+08	7.71892e+08		0.817348	0.0577626				Ensconsin	Map7
136730000	134790000	110670000		90688000	98720000	122820000		137028210	135088210	110968210		90986210	99018210	123118210		1.27695e+08	104374210		0.817372	0.142216				Melanoma-associated antigen G1	Ndnl2
75773000	74670000	66774000		39927000	53463000	83995000		76071210	74968210	67072210		40225210	53761210	84293210		7.27039e+07	5.94265e+07		0.817378	0.375839				Tumor necrosis factor alpha-induced protein 8	Tnfaip8
165830000	101910000	115640000		113960000	96937000	102450000		166128210	102208210	115938210		114258210	97235210	102748210		1.28092e+08	104747210		0.817753	0.309297				Ran-binding protein 10	Ranbp10
126460000	78983000	96055000		59942000	89676000	96781000		126758210	79281210	96353210		60240210	89974210	97079210		1.00798e+08	82431210		0.81779	0.362649				RUS1 family protein C16orf58 homolog	BC017158
239260000	185490000	183350000		145490000	173170000	178510000		239558210	185788210	183648210		145788210	173468210	178808210		202998210	1.66022e+08		0.817847	0.152455				Ubiquitin-conjugating enzyme E2 J1	Ube2j1
3335400000	4328800000	3742200000		3193000000	3354800000	2781500000		3335698210	4329098210	3742498210		3193298210	3355098210	2781798210		3.80243e+09	3.11006e+09		0.817915	0.107659				N-acetylneuraminate lyase	Npl
446410000	496050000	448150000		364860000	358610000	413950000		446708210	496348210	448448210		365158210	358908210	414248210		4.63835e+08	379438210		0.818046	0.0241705				Tissue alpha-L-fucosidase	Fuca1
991880000	713540000	730350000		578540000	681420000	732540000		992178210	713838210	730648210		578838210	681718210	732838210		8.12222e+08	6.64465e+08		0.818083	0.216749				Maleylacetoacetate isomerase	Gstz1
189820000	189860000	155010000		139800000	158150000	139310000		190118210	190158210	155308210		140098210	158448210	139608210		178528210	1.46052e+08		0.818087	0.0691318				2-hydroxyacyl-CoA lyase 1	Hacl1
2487300000	2892400000	2743000000		2138600000	2354900000	2152000000		2487598210	2892698210	2743298210		2138898210	2355198210	2152298210		2.70786e+09	2.21546e+09		0.818159	0.0231049				Nicalin	Ncln
798920000	854620000	944980000		655680000	721990000	748200000		799218210	854918210	945278210		655978210	722288210	748498210		8.66472e+08	7.08922e+08		0.818171	0.035931				Cation-dependent mannose-6-phosphate receptor	M6pr
2910700000	3150100000	2875800000		2233200000	2433800000	2645300000		2910998210	3150398210	2876098210		2233498210	2434098210	2645598210		2.97916e+09	2.43773e+09		0.81826	0.0211097				Argininosuccinate lyase	Asl
162760000	198200000	215850000		183460000	109850000	178540000		163058210	198498210	216148210		183758210	110148210	178838210		192568210	1.57582e+08		0.818315	0.285857				Methyltransferase-like protein 13	Mettl13
62917000	80126000	82846000		60940000	50712000	73039000		63215210	80424210	83144210		61238210	51010210	73337210		7.55945e+07	6.18619e+07		0.818338	0.200771				Centriolin	Cntrl
395630000	268140000	295400000		360500000	189640000	234710000		395928210	268438210	295698210		360798210	189938210	235008210		3.20022e+08	2.61915e+08		0.818429	0.41632				Tuberin	Tsc2
107010000	120710000	103740000		84282000	99623000	87254000		107308210	121008210	104038210		84580210	99921210	87552210		1.10785e+08	9.06845e+07		0.818564	0.0455153				Lysophosphatidic acid receptor 3	Lpar3
91687000	125050000	112190000		120720000	62962000	85435000		91985210	125348210	112488210		121018210	63260210	85733210		1.09941e+08	9.00039e+07		0.81866	0.362518				Poly(A) polymerase beta	Papolb
71946000	74622000	54397000		60624000	53392000	50427000		72244210	74920210	54695210		60922210	53690210	50725210		6.72865e+07	5.51125e+07		0.819072	0.158305					Serpinb9
629590000	842180000	660880000		620100000	591390000	535880000		629888210	842478210	661178210		620398210	591688210	536178210		7.11182e+08	5.82755e+08		0.819418	0.143575				Solute carrier family 52, riboflavin transporter, member 3	Slc52a3
20205000	7738200	12072000		10813000	10505000	11312000		20503210	8036410	12370210		11111210	10803210	11610210		13636610	1.11749e+07		0.819476	0.538233				Graves disease carrier protein homolog	Slc25a16
321250000	204860000	203740000		280980000	217550000	99446000		321548210	205158210	204038210		281278210	217848210	99744210		2.43582e+08	1.99624e+08		0.819535	0.54153					4930504O13Rik
289260000	237070000	220530000		283710000	160450000	167970000		289558210	237368210	220828210		284008210	160748210	168268210		2.49252e+08	2.04342e+08		0.819821	0.374268				Uncharacterized protein C17orf62 homolog	BC017643
78689000	117620000	73384000		74559000	68107000	78314000		78987210	117918210	73682210		74857210	68405210	78612210		9.01959e+07	73958210		0.819973	0.318416				Sorting nexin-14	Snx14
53605000	65932000	55100000		34973000	60526000	47542000		53903210	66230210	55398210		35271210	60824210	47840210		5.85105e+07	4.79785e+07		0.819998	0.275094				Myc box-dependent-interacting protein 1	Bin1
19103000000	17367000000	14995000000		13144000000	12982000000	16080000000		19103298210	17367298210	14995298210		13144298210	12982298210	16080298210		17155298210	1.4069e+10		0.820094	0.118878				Radial spoke head 1 homolog	Rsph1	PCD
43583000	92385000	101500000		64264000	74989000	55400000		43881210	92683210	101798210		64562210	75287210	55698210		79454210	6.51825e+07		0.820379	0.491148				Uncharacterized protein C18orf8 homolog	3110002H16Rik;Mic1
144130000	133030000	121060000		89783000	108100000	128680000		144428210	133328210	121358210		90081210	108398210	128978210		133038210	1.09153e+08		0.82046	0.141434				Golgi apparatus membrane protein TVP23 homolog B	Tvp23b
14924000	17107000	13443000		9291700	19733000	8135000		15222210	17405210	13741210		9589910	20031210	8433210		15456210	1.26848e+07		0.820691	0.510273				Ig heavy chain V region J558;Ig heavy chain V region MOPC 104E;Ig heavy chain V region AC38 205.12	Ighv1-42;Ighv1-31
57535000	42785000	49106000		34169000	36320000	52004000		57833210	43083210	49404210		34467210	36618210	52302210		5.01069e+07	41129210		0.82083	0.272433				Adenosine deaminase	Ada
731370000	877690000	956250000		619890000	690460000	797480000		731668210	877988210	956548210		620188210	690758210	797778210		8.55402e+08	702908210		0.821729	0.142587				Nucleobindin-2;Nesfatin-1	Nucb2
1421000000	1350600000	1427600000		1154200000	1029800000	1266800000		1421298210	1350898210	1427898210		1154498210	1030098210	1267098210		1.40003e+09	1.15056e+09		0.821814	0.0265514				Baculoviral IAP repeat-containing protein 6	Birc6
1401900000	1417100000	1238300000		1164000000	1062200000	1108500000		1402198210	1417398210	1238598210		1164298210	1062498210	1108798210		1.35273e+09	1.11186e+09		0.821941	0.0200744				Glypican-4;Secreted glypican-4	Gpc4
1313000000	1272100000	1335600000		1154200000	1011200000	1057100000		1313298210	1272398210	1335898210		1154498210	1011498210	1057398210		1307198210	1.07446e+09		0.82196	0.00722097				Monofunctional C1-tetrahydrofolate synthase, mitochondrial	Mthfd1l
224450000	0	64431000		0	237300000	0		224748210	298210	64729210		298210	237598210	298210		9.65919e+07	79398210		0.821997	0.876099					BC051142
1909800000	1984800000	2003000000		1609100000	1575700000	1663200000		1910098210	1985098210	2003298210		1609398210	1575998210	1663498210		1.96616e+09	1616298210		0.822056	0.000793267				Band 4.1-like protein 3;Band 4.1-like protein 3, N-terminally processed	Epb41l3
191110000	165440000	201440000		162020000	140000000	156770000		191408210	165738210	201738210		162318210	140298210	157068210		1.86295e+08	153228210		0.822504	0.0584663				Centriolar coiled-coil protein of 110 kDa	Ccp110
369450000	267280000	268740000		232520000	187500000	324780000		369748210	267578210	269038210		232818210	187798210	325078210		3.02122e+08	2.48565e+08		0.822731	0.366878				ER membrane protein complex subunit 3	Emc3
603990000	631110000	558390000		465870000	544060000	465770000		604288210	631408210	558688210		466168210	544358210	466068210		598128210	492198210		0.822898	0.0344889				Sortilin	Sort1
1309300000	1290200000	1343900000		1060700000	1105800000	1078400000		1309598210	1290498210	1344198210		1060998210	1106098210	1078698210		1.31476e+09	1.08193e+09		0.822909	0.000340831				Guanylate cyclase;Atrial natriuretic peptide receptor 1	Npr1
415210000	387380000	292070000		259580000	331270000	309870000		415508210	387678210	292368210		259878210	331568210	310168210		3.65185e+08	300538210		0.822976	0.206424				Na(+)/H(+) exchange regulatory cofactor NHE-RF1	Slc9a3r1
3350700000	3884800000	4060100000		3047500000	3098800000	3151500000		3350998210	3885098210	4060398210		3047798210	3099098210	3151798210		3765498210	3.09956e+09		0.823149	0.0365379				Acetyl-coenzyme A synthetase;Acetyl-coenzyme A synthetase 2-like, mitochondrial	Acss1
38637000	18189000	31806000		17695000	22881000	32255000		38935210	18487210	32104210		17993210	23179210	32553210		29842210	24575210		0.823505	0.514164				DALR anticodon-binding domain-containing protein 3	Dalrd3
159670000	111630000	141330000		84970000	132490000	122430000		159968210	111928210	141628210		85268210	132788210	122728210		1.37842e+08	1.13595e+08		0.824098	0.294646				Transmembrane protein 231	Tmem231
141030000	93856000	78934000		99070000	101730000	57730000		141328210	94154210	79232210		99368210	102028210	58028210		1.04905e+08	8.64749e+07		0.824317	0.477052				Glycerate kinase	Glyctk
104730000	64886000	87911000		75439000	77221000	59470000		105028210	65184210	88209210		75737210	77519210	59768210		8.61405e+07	71008210		0.82433	0.304348				CAAX prenyl protease 2	Rce1
1694500000	1536500000	1755400000		1311400000	1334200000	1464900000		1694798210	1536798210	1755698210		1311698210	1334498210	1465198210		1.66243e+09	1.37046e+09		0.824374	0.022561				ES1 protein homolog, mitochondrial	D10Jhu81e
37195000	41225000	49804000		31580000	32719000	41267000		37493210	41523210	50102210		31878210	33017210	41565210		4.30395e+07	3.54869e+07		0.824518	0.191704				Microtubule-actin cross-linking factor 1	Macf1
1852400000	2097400000	2066300000		1518700000	1840600000	1603100000		1852698210	2097698210	2066598210		1518998210	1840898210	1603398210		2.00566e+09	1.65443e+09		0.824879	0.0465205				Calcium-binding mitochondrial carrier protein Aralar2	Slc25a13
1038700000	934230000	1005900000		825980000	765770000	865350000		1038998210	934528210	1006198210		826278210	766068210	865648210		9.93242e+08	8.19332e+08		0.824907	0.0147241				NADH-ubiquinone oxidoreductase chain 1	Mtnd1
126060000	129230000	101620000		92787000	99503000	102040000		126358210	129528210	101918210		93085210	99801210	102338210		119268210	98408210		0.8251	0.0847949				Cholesterol 24-hydroxylase	Cyp46a1
2581500000	2342400000	2225800000		1793000000	2006100000	2100100000		2581798210	2342698210	2226098210		1793298210	2006398210	2100398210		2.38353e+09	1966698210		0.825119	0.0396607				Monoacylglycerol lipase ABHD12	Abhd12
578990000	740550000	302690000		518510000	372740000	447400000		579288210	740848210	302988210		518808210	373038210	447698210		5.41042e+08	4.46515e+08		0.825288	0.521182					Sgsh
287010000	283720000	295780000		224770000	268500000	221700000		287308210	284018210	296078210		225068210	268798210	221998210		2.89135e+08	2.38622e+08		0.825295	0.0313411					Pvr
95513000	93801000	129510000		61490000	91668000	109810000		95811210	94099210	129808210		61788210	91966210	110108210		1.06573e+08	87954210		0.825296	0.365795				SURP and G-patch domain-containing protein 1	Sugp1
3101000000	2783900000	2780900000		2254500000	2105000000	2792300000		3101298210	2784198210	2781198210		2254798210	2105298210	2792598210		2888898210	2.38423e+09		0.825308	0.097413					Tcam1
36713000	36054000	58062000		48013000	25535000	34286000		37011210	36352210	58360210		48311210	25833210	34584210		4.39079e+07	3.62429e+07		0.82543	0.475701				Apolipoprotein C-IV	Apoc4
72513000	98646000	51807000		34272000	62443000	87176000		72811210	98944210	52105210		34570210	62741210	87474210		74620210	61595210		0.825449	0.558357				Zinc finger FYVE domain-containing protein 16	Zfyve16
1564300000	2099200000	2075400000		1595000000	1598300000	1544900000		1564598210	2099498210	2075698210		1595298210	1598598210	1545198210		1.91326e+09	1579698210		0.825656	0.12985				Serine beta-lactamase-like protein LACTB, mitochondrial	Lactb
542680000	593410000	574580000		496680000	510080000	405580000		542978210	593708210	574878210		496978210	510378210	405878210		5.70522e+08	471078210		0.825697	0.0507806				Glycerol-3-phosphate dehydrogenase 1-like protein	Gpd1l
94344000	108690000	123900000		69402000	108450000	91963000		94642210	108988210	124198210		69700210	108748210	92261210		109276210	9.02365e+07		0.825766	0.250332				AFG3-like protein 1	Afg3l1
37091000	39457000	0		31853000	31218000	0		37389210	39755210	298210		32151210	31516210	298210		25814210	2.13219e+07		0.825974	0.799437				MAPK-interacting and spindle-stabilizing protein-like	Mapk1ip1l
509820000	595900000	631870000		462930000	405130000	567120000		510118210	596198210	632168210		463228210	405428210	567418210		5.79495e+08	4.78692e+08		0.82605	0.166286				Serine/threonine-protein phosphatase 4 regulatory subunit 3B	Smek2
7326300000	7739200000	8532700000		6488700000	6875400000	6130000000		7326598210	7739498210	8532998210		6488998210	6875698210	6130298210		7.86636e+09	6.49833e+09		0.826091	0.0298727				Very-long-chain (3R)-3-hydroxyacyl-CoA dehydratase 3	Hacd3
1447400000	1482700000	1366100000		1129400000	1259700000	1161100000		1447698210	1482998210	1366398210		1129698210	1259998210	1161398210		1.43236e+09	1183698210		0.826394	0.00891543				ADP-dependent glucokinase	Adpgk
7212000000	9464200000	9823200000		6613300000	8243000000	7044300000		7212298210	9464498210	9823498210		6613598210	8243298210	7044598210		8.83343e+09	7300498210		0.826462	0.182475				Prostaglandin reductase 1	Ptgr1
1114200000	1189400000	1417300000		1052500000	1111600000	911650000		1114498210	1189698210	1417598210		1052798210	1111898210	911948210		1240598210	1025548210		0.826656	0.11908				Caspase-6;Caspase-6 subunit p18;Caspase-6 subunit p11	Casp6
709510000	666840000	719880000		562680000	559120000	611050000		709808210	667138210	720178210		562978210	559418210	611348210		6.99042e+08	5.77915e+08		0.826725	0.00654464				1-acyl-sn-glycerol-3-phosphate acyltransferase alpha;1-acyl-sn-glycerol-3-phosphate acyltransferase	Agpat1
8374500000	9214401000	9046500000		7056500000	7653500000	7313300000		8374798210	9214699210	9046798210		7056798210	7653798210	7313598210		8878765210	7341398210		0.826849	0.00765915				Malate dehydrogenase, cytoplasmic	Mdh1
36452000	33580000	26178000		28058000	22393000	28963000		36750210	33878210	26476210		28356210	22691210	29261210		32368210	2.67695e+07		0.827032	0.20349				Rho GTPase-activating protein 12	Arhgap12
186140000	161610000	129600000		95578000	114900000	184170000		186438210	161908210	129898210		95876210	115198210	184468210		1.59415e+08	1.31848e+08		0.827072	0.430691				Ankyrin repeat and SOCS box protein 3	Asb3
66332000	66041000	66801000		57917000	50408000	56356000		66630210	66339210	67099210		58215210	50706210	56654210		6.66895e+07	5.51919e+07		0.827594	0.00747671				RING finger protein 214	Rnf214
212590000	296510000	320670000		261130000	212340000	213290000		212888210	296808210	320968210		261428210	212638210	213588210		276888210	229218210		0.827837	0.26156				COMM domain-containing protein 3	Commd3
565630000	402840000	400170000		389400000	338160000	405450000		565928210	403138210	400468210		389698210	338458210	405748210		4.56512e+08	377968210		0.827949	0.249541				Nuclear pore complex protein Nup85	Nup85
468480000	382080000	431090000		328620000	385550000	347210000		468778210	382378210	431388210		328918210	385848210	347508210		4.27515e+08	3.54092e+08		0.828255	0.0713378				Striatin-3	Strn3
2034400000	1982600000	2345800000		1782200000	1928600000	1559700000		2034698210	1982898210	2346098210		1782498210	1928898210	1559998210		2.12123e+09	1.75713e+09		0.828354	0.0800308				Unconventional myosin-Id	Myo1d
1337900000	1156200000	891840000		881240000	813790000	1109700000		1338198210	1156498210	892138210		881538210	814088210	1109998210		1.12894e+09	935208210		0.828391	0.285911				Isocitrate dehydrogenase [NAD] subunit, mitochondrial;Isocitrate dehydrogenase [NAD] subunit gamma 1, mitochondrial	Idh3g
118310000	109440000	118920000		98382000	101290000	87478000		118608210	109738210	119218210		98680210	101588210	87776210		1.15855e+08	9.60149e+07		0.828751	0.0188734				Axin interactor, dorsalization-associated protein	Aida
12859000000	13327000000	14935000000		9760500000	12992000000	11329000000		12859298210	13327298210	14935298210		9760798210	12992298210	11329298210		13707298210	11360798210		0.828814	0.105341				Complement C3;Complement C3 beta chain;C3-beta-c;Complement C3 alpha chain;C3a anaphylatoxin;Acylation stimulating protein;Complement C3b alpha chain;Complement C3c alpha chain fragment 1;Complement C3dg fragment;Complement C3g fragment;Complement C3d fragment;Complement C3f fragment;Complement C3c alpha chain fragment 2	C3
166310000	220920000	140210000		164190000	89916000	182960000		166608210	221218210	140508210		164488210	90214210	183258210		1.76112e+08	1.45987e+08		0.828946	0.461754				Rab-like protein 2A	Rabl2
469430000	401630000	653330000		262820000	580330000	420510000		469728210	401928210	653628210		263118210	580628210	420808210		508428210	421518210		0.829061	0.504153				SH3 domain-binding glutamic acid-rich-like protein 3	Sh3bgrl3
26628000	19649000	28607000		23106000	18565000	20264000		26926210	19947210	28905210		23404210	18863210	20562210		2.52595e+07	20943210		0.829121	0.226476				Ubiquitin-60S ribosomal protein L40;Ubiquitin;60S ribosomal protein L40	Kxd1;Uba52;Gm7808
1581300000	1136900000	1189700000		1057400000	1142800000	1039900000		1581598210	1137198210	1189998210		1057698210	1143098210	1040198210		1.30293e+09	1.08033e+09		0.829154	0.196351					2210010C04Rik
44946000	60668000	75304000		52071000	51701000	46093000		45244210	60966210	75602210		52369210	51999210	46391210		60604210	50253210		0.829203	0.313067				G2/mitotic-specific cyclin-B1	Ccnb1
341760000	470810000	576330000		392320000	326080000	433970000		342058210	471108210	576628210		392618210	326378210	434268210		4.63265e+08	3.84422e+08		0.829809	0.351026				Beta-actin-like protein 2	Actbl2
70807000	63899000	64603000		59262000	43587000	62460000		71105210	64197210	64901210		59560210	43885210	62758210		6.67345e+07	55401210		0.830173	0.14306				DNA-directed RNA polymerase I subunit RPA43	Twistnb
6516600000	7023800000	6323100000		5339000000	5443800000	5709000000		6516898210	7024098210	6323398210		5339298210	5444098210	5709298210		6.62146e+09	5.49756e+09		0.830264	0.00891135					Atr
27829000	39725000	34138000		25356000	29785000	29157000		28127210	40023210	34436210		25654210	30083210	29455210		3.41955e+07	2.83975e+07		0.830446	0.192586				Midkine	Mdk
1093100000	1086100000	1079800000		945500000	782810000	978880000		1093398210	1086398210	1080098210		945798210	783108210	979178210		1.08663e+09	9.02695e+08		0.830728	0.0387451				Scavenger receptor class A member 5	Scara5
17149000	16131000	15794000		12527000	15792000	12320000		17447210	16429210	16092210		12825210	16090210	12618210		16656210	1.38445e+07		0.831194	0.0784244				Protein O-linked-mannose beta-1,4-N-acetylglucosaminyltransferase 2	Pomgnt2
447330000	430140000	412390000		303830000	384520000	383660000		447628210	430438210	412688210		304128210	384818210	383958210		4.30252e+08	3.57635e+08		0.831223	0.0640021				Rhomboid domain-containing protein 3	Rhbdd3
1189600000	1434400000	1002500000		1057400000	976210000	980690000		1189898210	1434698210	1002798210		1057698210	976508210	980988210		1.20913e+09	1.00506e+09		0.831229	0.185541				Lysosomal alpha-glucosidase	Gaa
168410000	211330000	176820000		140040000	159240000	163250000		168708210	211628210	177118210		140338210	159538210	163548210		185818210	1.54475e+08		0.831323	0.104186				Rab11 family-interacting protein 5	Rab11fip5
44439000	52183000	65070000		39304000	56664000	38316000		44737210	52481210	65368210		39602210	56962210	38614210		5.41955e+07	4.50595e+07		0.831425	0.341346					Tpm3
158140000	158300000	141580000		118110000	75043000	187550000		158438210	158598210	141878210		118408210	75341210	187848210		1.52972e+08	127199210		0.831522	0.481426				ATP-dependent RNA helicase DDX3Y	Ddx3y
19361000	57301000	58769000		53248000	59220000	0		19659210	57599210	59067210		53546210	59518210	298210		4.54419e+07	3.77875e+07		0.831558	0.754149				Complex I assembly factor TIMMDC1, mitochondrial	Timmdc1
6122900000	6521900000	6997800000		5559300000	5567300000	5208900000		6123198210	6522198210	6998098210		5559598210	5567598210	5209198210		6.54783e+09	5.44546e+09		0.831644	0.0168276				Leukotriene A-4 hydrolase	Lta4h
89191000	84648000	103140000		78047000	51130000	101160000		89489210	84946210	103438210		78345210	51428210	101458210		9.26245e+07	77077210		0.832147	0.372314				DNA replication complex GINS protein PSF2	Gins2
22747000	0	16832000		0	15916000	16881000		23045210	298210	17130210		298210	16214210	17179210		13491210	1.12305e+07		0.832434	0.808662				Glypican-2;Secreted glypican-2	Gpc2
100040000	47577000	100040000		79097000	53784000	73157000		100338210	47875210	100338210		79395210	54082210	73455210		8.28505e+07	6.89775e+07		0.832554	0.507537				mRNA-capping enzyme;Polynucleotide 5-triphosphatase;mRNA guanylyltransferase	Rngtt
165570000	149820000	171020000		149580000	121150000	134110000		165868210	150118210	171318210		149878210	121448210	134408210		1.62435e+08	1.35245e+08		0.83261	0.0589725				Dyslexia-associated protein KIAA0319-like protein	AU040320;Kiaa0319l
292230000	242650000	210270000		196430000	219100000	204910000		292528210	242948210	210568210		196728210	219398210	205208210		2.48682e+08	2.07112e+08		0.832838	0.168111				GDP-Man:Man(3)GlcNAc(2)-PP-Dol alpha-1,2-mannosyltransferase	Alg11
370760000	361120000	398280000		303970000	278830000	358510000		371058210	361418210	398578210		304268210	279128210	358808210		377018210	314068210		0.833032	0.0728183				Band 4.1-like protein 5	Epb41l5
113230000	86872000	85357000		91541000	65697000	80497000		113528210	87170210	85655210		91839210	65995210	80795210		95451210	79543210		0.833339	0.247038				DNA/RNA-binding protein KIN17	Kin
1403400000	1401300000	1309100000		1071500000	1246300000	1112400000		1403698210	1401598210	1309398210		1071798210	1246598210	1112698210		1.37156e+09	1143698210		0.833864	0.0204828				GDH/6PGL endoplasmic bifunctional protein;Glucose 1-dehydrogenase;6-phosphogluconolactonase	H6pd
449150000	440480000	537160000		396210000	407510000	386170000		449448210	440778210	537458210		396508210	407808210	386468210		4.75895e+08	396928210		0.834067	0.0662348				Choline/ethanolamine kinase	Chkb
41166000	63177000	13708000		0	0	98318000		41464210	63475210	14006210		298210	298210	98616210		3.96485e+07	3.30709e+07		0.834101	0.863011					Psmc3
30779000	13750000	18209000		0	30643000	21541000		31077210	14048210	18507210		298210	30941210	21839210		2.12109e+07	1.76929e+07		0.834142	0.752585				Phosphoglycerate kinase 2	Pgk2
352130000	412320000	341150000		392600000	195120000	334450000		352428210	412618210	341448210		392898210	195418210	334748210		3.68832e+08	307688210		0.834224	0.384201				Reticulon-4-interacting protein 1, mitochondrial	Rtn4ip1
191570000	158690000	210580000		148040000	163430000	156280000		191868210	158988210	210878210		148338210	163728210	156578210		1.87245e+08	1.56215e+08		0.834281	0.12093				Deoxynucleotidyltransferase terminal-interacting protein 1	Dnttip1
1732300000	1712900000	2085500000		1490500000	1601100000	1522500000		1732598210	1713198210	2085798210		1490798210	1601398210	1522798210		1.84386e+09	1.53833e+09		0.834297	0.0715925				Tyrosine--tRNA ligase;Tyrosine--tRNA ligase, cytoplasmic;Tyrosine--tRNA ligase, cytoplasmic, N-terminally processed	Yars
345840000	756850000	874990000		704920000	536750000	408320000		346138210	757148210	875288210		705218210	537048210	408618210		6.59525e+08	5.50295e+08		0.834381	0.580559				Dipeptidase 1	Dpep1
306460000	276150000	353380000		458100000	129480000	193270000		306758210	276448210	353678210		458398210	129778210	193568210		3.12295e+08	2.60582e+08		0.834409	0.642265				U6 snRNA-associated Sm-like protein LSm5	Lsm5
2918000000	3359000000	2726200000		2573000000	2130200000	2810500000		2918298210	3359298210	2726498210		2573298210	2130498210	2810798210		3.00136e+09	2.50486e+09		0.834575	0.143712				Annexin A4;Annexin	Anxa4
586670000	698920000	664280000		495300000	603840000	528390000		586968210	699218210	664578210		495598210	604138210	528688210		6.50255e+08	542808210		0.834762	0.0805574				MICOS complex subunit Mic10	Minos1
123270000	83146000	95570000		71994000	41029000	139010000		123568210	83444210	95868210		72292210	41327210	139308210		100960210	84309210		0.835074	0.622411				Nucleolar protein 14	Nop14
5632600000	5933300000	5374600000		4503700000	4554800000	5093400000		5632898210	5933598210	5374898210		4503998210	4555098210	5093698210		5.64713e+09	4717598210		0.835397	0.0200533				Electron transfer flavoprotein subunit alpha, mitochondrial	Etfa
73561000	34213000	27905000		59427000	13485000	40338000		73859210	34511210	28203210		59725210	13783210	40636210		4.55245e+07	38048210		0.835774	0.721391				GAS2-like protein 2	Gas2l2
6416500000	7068600000	6520600000		4685900000	5570300000	6464100000		6416798210	7068898210	6520898210		4686198210	5570598210	6464398210		6.66886e+09	5.57373e+09		0.835784	0.118139				Carboxylesterase 1C	Ces1c
450700000	406240000	351220000		374050000	314320000	321630000		450998210	406538210	351518210		374348210	314618210	321928210		403018210	3.36965e+08		0.836103	0.127042				Protein FAM192A	Fam192a
331060000	279490000	276920000		231220000	245100000	266330000		331358210	279788210	277218210		231518210	245398210	266628210		2.96122e+08	247848210		0.836981	0.0768943				NADH dehydrogenase [ubiquinone] 1 beta subcomplex subunit 11, mitochondrial	Ndufb11
3204300000	3138500000	2414800000		2167900000	2390700000	2771800000		3204598210	3138798210	2415098210		2168198210	2390998210	2772098210		2919498210	2.44376e+09		0.83705	0.197689				Lysosome-associated membrane glycoprotein 1	Lamp1
6119400000	6444300000	5957800000		4983200000	5393800000	5128100000		6119698210	6444598210	5958098210		4983498210	5394098210	5128398210		6.17413e+09	5.16866e+09		0.837148	0.00576603				Methylcrotonoyl-CoA carboxylase beta chain, mitochondrial	Mccc2
750890000	821260000	882950000		690970000	600690000	763550000		751188210	821558210	883248210		691268210	600988210	763848210		8.18665e+08	685368210		0.837178	0.0927555				Neural Wiskott-Aldrich syndrome protein	Wasl
299360000	390250000	375780000		317340000	239360000	335110000		299658210	390548210	376078210		317638210	239658210	335408210		355428210	297568210		0.83721	0.228567					Tmem29
124480000	186780000	153400000		131630000	119460000	137920000		124778210	187078210	153698210		131928210	119758210	138218210		1.55185e+08	129968210		0.837506	0.250863				Glycogenin-1	Gyg;Gyg1
18470000	22274000	5064600		0	19926000	18311000		18768210	22572210	5362810		298210	20224210	18609210		1.55677e+07	1.30439e+07		0.837878	0.774938				Chromatin assembly factor 1 subunit B	Chaf1b
568020000	648460000	634040000		493970000	524030000	532760000		568318210	648758210	634338210		494268210	524328210	533058210		617138210	517218210		0.838091	0.0218554				Protein YIPF5	Yipf5
948800000	774350000	768540000		679410000	655830000	753260000		949098210	774648210	768838210		679708210	656128210	753558210		8.30862e+08	6.96465e+08		0.838244	0.1115				Minor histocompatibility antigen H13	Hm13;H13
47727000	57866000	52325000		32032000	33686000	66513000		48025210	58164210	52623210		32330210	33984210	66811210		5.29375e+07	44375210		0.838256	0.50155				Solute carrier family 15 member 4	Slc15a4
136090000	101660000	147590000		113010000	104250000	105610000		136388210	101958210	147888210		113308210	104548210	105908210		1.28745e+08	1.07922e+08		0.838259	0.212834					Rasal2
41017000	37553000	68166000		41871000	39358000	41693000		41315210	37851210	68464210		42169210	39656210	41991210		49210210	41272210		0.838692	0.459647				YTH domain-containing family protein 3	Ythdf3
144600000	184450000	151440000		143090000	125760000	134030000		144898210	184748210	151738210		143388210	126058210	134328210		1.60462e+08	1.34592e+08		0.838778	0.12327					Arhgef11
43984000	42548000	37056000		30847000	34916000	37761000		44282210	42846210	37354210		31145210	35214210	38059210		41494210	34806210		0.838821	0.0832681				Cell cycle checkpoint protein RAD17	Rad17
99293000	113870000	105950000		95873000	74770000	96939000		99591210	114168210	106248210		96171210	75068210	97237210		106669210	89492210		0.838969	0.109056				Protein Simiate	Fam206a
65575000	44114000	53604000		69075000	31699000	36095000		65873210	44412210	53902210		69373210	31997210	36393210		54729210	45921210		0.839062	0.544849
1305800000	1321800000	1456300000		1251000000	1014000000	1162200000		1306098210	1322098210	1456598210		1251298210	1014298210	1162498210		1361598210	1142698210		0.839233	0.0596773				Peroxisomal membrane protein PEX14	Pex14
732130000	749520000	749400000		659560000	574810000	638520000		732428210	749818210	749698210		659858210	575108210	638818210		7.43982e+08	6.24595e+08		0.83953	0.0102616				NADH-ubiquinone oxidoreductase chain 5	mt-Nd5;Mtnd5
133560000	112870000	105350000		107200000	82798000	105200000		133858210	113168210	105648210		107498210	83096210	105498210		117558210	9.86975e+07		0.839563	0.176425				Malonyl-CoA decarboxylase, mitochondrial	Mlycd
50023000	59228000	46523000		50068000	43465000	37121000		50321210	59526210	46821210		50366210	43763210	37419210		5.22229e+07	4.38495e+07		0.839662	0.190764					Ap5s1
255090000	231050000	267320000		189930000	185150000	257480000		255388210	231348210	267618210		190228210	185448210	257778210		2.51452e+08	2.11152e+08		0.839731	0.19151				Protein BRICK1	Brk1
324390000	338550000	333430000		322240000	235110000	279190000		324688210	338848210	333728210		322538210	235408210	279488210		3.32422e+08	2.79145e+08		0.839732	0.10483				U3 small nucleolar RNA-interacting protein 2	Rrp9
171240000	290360000	190960000		206410000	174240000	167380000		171538210	290658210	191258210		206708210	174538210	167678210		217818210	1.82975e+08		0.840035	0.419675				Phosphoinositide phospholipase C	Plcb4
35788000	21214000	43163000		39368000	20235000	24396000		36086210	21512210	43461210		39666210	20533210	24694210		3.36865e+07	2.82979e+07		0.840035	0.568338				Ras GTPase-activating protein 3	Rasa3
471060000	505490000	525860000		433930000	381110000	446930000		471358210	505788210	526158210		434228210	381408210	447228210		5.01102e+08	4.20955e+08		0.840059	0.0356027				Gamma-tubulin complex component 3	Tubgcp3
5352500000	4883000000	5055000000		3811000000	4465700000	4569800000		5352798210	4883298210	5055298210		3811298210	4465998210	4570098210		5.09713e+09	4.28246e+09		0.840172	0.0411198				Very long-chain specific acyl-CoA dehydrogenase, mitochondrial	Acadvl
45482000	63343000	49247000		35286000	53454000	43949000		45780210	63641210	49545210		35584210	53752210	44247210		5.29889e+07	4.45279e+07		0.840325	0.325438					1700029P11Rik
36217000	100180000	114280000		55597000	70995000	84061000		36515210	100478210	114578210		55895210	71293210	84359210		83857210	7.05159e+07		0.840904	0.627021				Zinc finger and BTB domain-containing protein 20	Zbtb20
181820000	188180000	169810000		169810000	121610000	162370000		182118210	188478210	170108210		170108210	121908210	162668210		1.80235e+08	1.51562e+08		0.840911	0.146056				Sequestosome-1	Sqstm1
248940000	257110000	277590000		175390000	263990000	219450000		249238210	257408210	277888210		175688210	264288210	219748210		2.61512e+08	219908210		0.840912	0.197651				Disabled homolog 2	Dab2
2859800000	3807500000	3690300000		2795200000	2812100000	3104300000		2860098210	3807798210	3690598210		2795498210	2812398210	3104598210		3.45283e+09	2.90416e+09		0.841097	0.15622				Short-chain specific acyl-CoA dehydrogenase, mitochondrial	Acads
4999900000	5814800000	4575000000		3746400000	3781000000	5421500000		5000198210	5815098210	4575298210		3746698210	3781298210	5421798210		5130198210	4316598210		0.84141	0.28621				Small nuclear ribonucleoprotein E	Snrpe
615090000	611760000	640620000		480370000	514900000	576050000		615388210	612058210	640918210		480668210	515198210	576348210		622788210	5.24072e+08		0.841492	0.0284321				Retinoid-inducible serine carboxypeptidase	Scpep1
396640000	351050000	344500000		334060000	298620000	286290000		396938210	351348210	344798210		334358210	298918210	286588210		3.64362e+08	3.06622e+08		0.841531	0.0568387				Tetratricopeptide repeat protein 39B	Ttc39b
233220000	84288000	135020000		151900000	96270000	132640000		233518210	84586210	135318210		152198210	96568210	132938210		1.51141e+08	1.27235e+08		0.84183	0.635391				Methylsterol monooxygenase 1	Msmo1
184300000	165990000	204340000		102870000	147460000	216460000		184598210	166288210	204638210		103168210	147758210	216758210		1.85175e+08	1.55895e+08		0.841879	0.44808				Coiled-coil domain-containing protein 103	Ccdc103	PCD
9187700000	7692600000	6930800000		6960000000	5814100000	7273000000		9187998210	7692898210	6931098210		6960298210	5814398210	7273298210		7.93733e+09	6.68266e+09		0.841928	0.190779				Alpha-2-HS-glycoprotein	Ahsg
244980000	203770000	205900000		184010000	162730000	204300000		245278210	204068210	206198210		184308210	163028210	204598210		2.18515e+08	183978210		0.841948	0.127235				Derlin-2	Derl2
499740000	459190000	391680000		362700000	372540000	401780000		500038210	459488210	391978210		362998210	372838210	402078210		4.50502e+08	3.79305e+08		0.841961	0.10168				BRI3-binding protein	Bri3bp
917540000	945820000	1108600000		910620000	773850000	818290000		917838210	946118210	1108898210		910918210	774148210	818588210		9.90952e+08	8.34552e+08		0.842172	0.0951922					Slc27a6
13598000	14058000	17986000		21489000	10239000	6572400		13896210	14356210	18284210		21787210	10537210	6870610		15512210	13065010		0.84224	0.629993				DCN1-like protein;DCN1-like protein 4	Dcun1d4
343530000	555990000	350860000		271970000	369270000	411760000		343828210	556288210	351158210		272268210	369568210	412058210		4.17092e+08	351298210		0.842257	0.462192				SLAIN motif-containing protein 2	Slain2
310400000	274150000	364690000		261890000	227660000	309900000		310698210	274448210	364988210		262188210	227958210	310198210		3.16712e+08	2.66782e+08		0.842349	0.232438				Ras-related protein Rab-9A	Rab9;Rab9a
1150700000	1373700000	1268700000		1106800000	972010000	1117000000		1150998210	1373998210	1268998210		1107098210	972308210	1117298210		1.26466e+09	1065568210		0.84257	0.0666187				Polymerase delta-interacting protein 2	Poldip2
3358000000	3404400000	3555400000		2827400000	3063000000	2803200000		3358298210	3404698210	3555698210		2827698210	3063298210	2803498210		3.43956e+09	2.89816e+09		0.842596	0.00606879				Cathepsin D	Ctsd
344890000	324580000	261970000		264070000	224240000	296430000		345188210	324878210	262268210		264368210	224538210	296728210		310778210	261878210		0.842653	0.207262				Monocarboxylate transporter 4	Slc16a3
3167800000	2722700000	2510400000		2417500000	2310100000	2355500000		3168098210	2722998210	2510698210		2417798210	2310398210	2355798210		2800598210	2.36133e+09		0.843153	0.088717				Large neutral amino acids transporter small subunit 1	Slc7a5
213370000	244480000	207960000		191940000	193130000	176400000		213668210	244778210	208258210		192238210	193428210	176698210		2.22235e+08	1.87455e+08		0.843499	0.0507306				Protein GPR107	Gpr107
292710000	394310000	287270000		221570000	275720000	324630000		293008210	394608210	287568210		221868210	276018210	324928210		3.25062e+08	2.74272e+08		0.843753	0.329621				ER membrane protein complex subunit 2	Emc2
808640000	739890000	953380000		698760000	676710000	735790000		808938210	740188210	953678210		699058210	677008210	736088210		834268210	7.04052e+08		0.843915	0.116635				NADH-cytochrome b5 reductase 1	Cyb5r1
851360000	992900000	1022600000		820500000	826650000	772400000		851658210	993198210	1022898210		820798210	826948210	772698210		955918210	8.06815e+08		0.844021	0.0549768				Protein prune homolog	Prune
152810000000	172260000000	179030000000		154300000000	141830000000	129420000000		152810298210	172260298210	179030298210		154300298210	141830298210	129420298210		1.68034e+11	141850298210		0.844178	0.0697359				Glutathione S-transferase Mu 1	Gstm1
140470000	164960000	116480000		135330000	126750000	93962000		140768210	165258210	116778210		135628210	127048210	94260210		1.40935e+08	1.18979e+08		0.844212	0.308502				Pumilio domain-containing protein KIAA0020	Kiaa0020
21682000	28033000	11321000		20864000	1779400	28759000		21980210	28331210	11619210		21162210	2077610	29057210		2.06435e+07	1.74323e+07		0.844445	0.74915				Growth arrest-specific protein 8	Gas8	DRC component
83025000	69749000	64065000		57888000	66796000	58316000		83323210	70047210	64363210		58186210	67094210	58614210		7.25779e+07	61298210		0.844585	0.14897				Uncharacterized protein C3orf38 homolog
595510000	817010000	818120000		632720000	584730000	666620000		595808210	817308210	818418210		633018210	585028210	666918210		7.43845e+08	6.28322e+08		0.844694	0.211454				G-protein-signaling modulator 1	Gpsm1
98909000	95610000	99631000		81636000	65442000	101290000		99207210	95908210	99929210		81934210	65740210	101588210		98348210	8.30875e+07		0.84483	0.217551				Histone-lysine N-methyltransferase	Setd1a
388770000	244280000	394640000		276790000	299280000	292040000		389068210	244578210	394938210		277088210	299578210	292338210		3.42862e+08	289668210		0.844855	0.344047				T-lymphoma invasion and metastasis-inducing protein 1	Tiam1
405350000	326020000	365040000		325410000	307280000	293830000		405648210	326318210	365338210		325708210	307578210	294128210		365768210	309138210		0.845175	0.08328				Guanine nucleotide-binding protein G(I)/G(S)/G(O) subunit gamma-10;Guanine nucleotide-binding protein subunit gamma	Gng10;Gm20503
2084700000	1974000000	1816400000		1561400000	1710400000	1693700000		2084998210	1974298210	1816698210		1561698210	1710698210	1693998210		1.95866e+09	1.65546e+09		0.845201	0.0290557				Inorganic pyrophosphatase 2, mitochondrial	Ppa2
3459100000	3215300000	2846900000		2501500000	2797700000	2750100000		3459398210	3215598210	2847198210		2501798210	2797998210	2750398210		3.17406e+09	2683398210		0.845414	0.0704179				Coronin;Coronin-1B	Coro1b
59458000	101670000	81915000		66133000	49211000	90014000		59756210	101968210	82213210		66431210	49509210	90312210		8.13125e+07	6.87509e+07		0.845514	0.50081				Protein unc-93 homolog B1	Unc93b1
440260000	415850000	514420000		353540000	419750000	385410000		440558210	416148210	514718210		353838210	420048210	385708210		4.57142e+08	3.86532e+08		0.84554	0.115847				E3 ubiquitin-protein ligase listerin	Ltn1
127300000	123820000	144810000		97726000	99483000	137580000		127598210	124118210	145108210		98024210	99781210	137878210		1.32275e+08	1.11895e+08		0.845924	0.23347				Atypical kinase ADCK3, mitochondrial	Adck3
164050000	174110000	95735000		92975000	172610000	101330000		164348210	174408210	96033210		93273210	172908210	101628210		1.4493e+08	122603210		0.845948	0.561201				E3 ubiquitin-protein ligase TRIM33	Trim33
133600000	120350000	120270000		102160000	111580000	102710000		133898210	120648210	120568210		102458210	111878210	103008210		125038210	1.05782e+08		0.845994	0.0231802				6-pyruvoyl tetrahydrobiopterin synthase	Pts
80752000	80097000	84945000		68506000	65130000	74278000		81050210	80395210	85243210		68804210	65428210	74576210		8.22295e+07	6.96029e+07		0.846446	0.0147355					N6amt1
174790000	181860000	197860000		177900000	153540000	137800000		175088210	182158210	198158210		178198210	153838210	138098210		1.85135e+08	1.56712e+08		0.846472	0.103276				Phosphatidylinositol transfer protein beta isoform	Pitpnb
195680000	217430000	264740000		200770000	207690000	165260000		195978210	217728210	265038210		201068210	207988210	165558210		226248210	191538210		0.846584	0.225668				Leucine-rich repeat and calponin homology domain-containing protein 3	Lrch3
687580000	554730000	598720000		544950000	535400000	478110000		687878210	555028210	599018210		545248210	535698210	478408210		6.13975e+08	5.19785e+08		0.84659	0.100627				Inhibitor of carbonic anhydrase	Ica;1300017J02Rik
149620000	210370000	179060000		153570000	154540000	148150000		149918210	210668210	179358210		153868210	154838210	148448210		1.79982e+08	1.52385e+08		0.846669	0.193007				F-box/LRR-repeat protein 20	Fbxl20
1984000000	1692100000	1963400000		1518200000	1673200000	1583400000		1984298210	1692398210	1963698210		1518498210	1673498210	1583698210		1.88013e+09	1591898210		0.846695	0.0505796				Short/branched chain specific acyl-CoA dehydrogenase, mitochondrial	Acadsb
95384000	114670000	120370000		90292000	107570000	81821000		95682210	114968210	120668210		90590210	107868210	82119210		1.1044e+08	9.35259e+07		0.846851	0.189202				Mitochondrial glutamate carrier 1	Slc25a22
1926500000	2135100000	1931600000		1593400000	1789400000	1693100000		1926798210	2135398210	1931898210		1593698210	1789698210	1693398210		1.99803e+09	1.69226e+09		0.846966	0.0264015				Nucleotide exchange factor SIL1	Sil1
260390000	256880000	277310000		227020000	229860000	215970000		260688210	257178210	277608210		227318210	230158210	216268210		265158210	2.24582e+08		0.846972	0.00592311				BolA-like protein 1	Bola1
2108400000	2150300000	1959400000		1692200000	1591000000	1983400000		2108698210	2150598210	1959698210		1692498210	1591298210	1983698210		2072998210	1.75583e+09		0.847001	0.0728346				45 kDa calcium-binding protein	Sdf4
406260000	357250000	407010000		337200000	334850000	319300000		406558210	357548210	407308210		337498210	335148210	319598210		3.90472e+08	330748210		0.847048	0.0264524				WASH complex subunit 7	Kiaa1033
1081700000	1274300000	1215100000		1042500000	929640000	1053000000		1081998210	1274598210	1215398210		1042798210	929938210	1053298210		1.19066e+09	1008678210		0.847155	0.0584407				Secernin-1	Scrn1
306970000	262380000	256380000		238610000	229040000	231790000		307268210	262678210	256678210		238908210	229338210	232088210		2.75542e+08	2.33445e+08		0.847222	0.0602325				Autophagy-related protein 2 homolog B	Atg2b
652050000	684480000	554700000		501210000	465640000	635840000		652348210	684778210	554998210		501508210	465938210	636138210		630708210	534528210		0.847505	0.212267				Cysteine-rich protein 2	Crip2
173220000	190340000	173510000		125740000	162840000	166600000		173518210	190638210	173808210		126038210	163138210	166898210		1.79322e+08	1.52025e+08		0.847778	0.127205				Gephyrin;Molybdopterin adenylyltransferase;Molybdopterin molybdenumtransferase	Gphn
633150000	572460000	677870000		459500000	515720000	621860000		633448210	572758210	678168210		459798210	516018210	622158210		6.28125e+08	532658210		0.848013	0.166703				BAG family molecular chaperone regulator 1	Bag1
289050000	401130000	253390000		283650000	242830000	273600000		289348210	401428210	253688210		283948210	243128210	273898210		3.14822e+08	2.66992e+08		0.848073	0.358767				Interferon-induced transmembrane protein 3	Ifitm3	Fragellis: germ cell marker
144930000	83411000	127000000		126240000	114430000	60579000		145228210	83709210	127298210		126538210	114728210	60877210		118745210	1.00715e+08		0.848157	0.544219				MKI67 FHA domain-interacting nucleolar phosphoprotein	Nifk
157810000	123230000	138750000		105120000	136830000	113970000		158108210	123528210	139048210		105418210	137128210	114268210		140228210	118938210		0.848176	0.196624				Ataxin-3	Atxn3
477870000	673390000	619810000		471150000	503320000	527880000		478168210	673688210	620108210		471448210	503618210	528178210		5.90655e+08	5.01082e+08		0.848349	0.213451				Regulator of microtubule dynamics protein 2	Rmdn2
104180000	84653000	103270000		62926000	96256000	88547000		104478210	84951210	103568210		63224210	96554210	88845210		9.76659e+07	8.28745e+07		0.848552	0.282286				Protein Hook homolog 2	Hook2
92599000	191240000	101730000		106210000	132610000	88229000		92897210	191538210	102028210		106508210	132908210	88527210		128821210	1.09315e+08		0.848576	0.596933				FUN14 domain-containing protein 2	Fundc2
1404800000	1581600000	1687400000		1248100000	1381200000	1337500000		1405098210	1581898210	1687698210		1248398210	1381498210	1337798210		1.55823e+09	1.32256e+09		0.84876	0.0611864				DCC-interacting protein 13-beta	Appl2
51593000	65718000	65653000		51423000	51941000	51803000		51891210	66016210	65951210		51721210	52239210	52101210		61286210	5.20205e+07		0.848813	0.11998				Probable low affinity copper uptake protein 2	Slc31a2
121880000	103630000	125760000		86370000	105090000	106590000		122178210	103928210	126058210		86668210	105388210	106888210		117388210	99648210		0.848877	0.132978				Ethylmalonyl-CoA decarboxylase	Echdc1
862580000	835930000	643970000		581240000	682420000	724800000		862878210	836228210	644268210		581538210	682718210	725098210		7.81125e+08	663118210		0.848927	0.218708				Cell differentiation protein RCD1 homolog	Rqcd1
154940000	161880000	212420000		193730000	96257000	159180000		155238210	162178210	212718210		194028210	96555210	159478210		1.76712e+08	1.50021e+08		0.848957	0.473859				Dolichol kinase	Dolk
271260000	303000000	324490000		278080000	236410000	248390000		271558210	303298210	324788210		278378210	236708210	248688210		2.99882e+08	2.54592e+08		0.848974	0.0842107				cAMP-dependent protein kinase type II-alpha regulatory subunit	Prkar2a
180600000	116210000	126400000		134200000	90387000	134660000		180898210	116508210	126698210		134498210	90685210	134958210		141368210	120047210		0.849181	0.438356				Glutamyl-tRNA(Gln) amidotransferase subunit B, mitochondrial	Gatb
197370000	246690000	221630000		174670000	187370000	203240000		197668210	246988210	221928210		174968210	187668210	203538210		2.22195e+08	1.88725e+08		0.849366	0.111821				Microsomal glutathione S-transferase 3	Mgst3
104440000	130300000	114460000		83044000	119080000	94420000		104738210	130598210	114758210		83342210	119378210	94718210		116698210	99146210		0.849595	0.249227				N-alpha-acetyltransferase 38, NatC auxiliary subunit	Naa38
226370000	128970000	109580000		112960000	119710000	162190000		226668210	129268210	109878210		113258210	120008210	162488210		1.55272e+08	131918210		0.849597	0.584176				O-acetyl-ADP-ribose deacetylase MACROD1	Macrod1
1109900000	1260700000	1285900000		1146600000	992930000	967710000		1110198210	1260998210	1286198210		1146898210	993228210	968008210		1.21913e+09	1.03604e+09		0.849822	0.079757				Myosin light chain 6B	Myl6b
286550000	270770000	294340000		224950000	220690000	278070000		286848210	271068210	294638210		225248210	220988210	278368210		2.84185e+08	2.41535e+08		0.849922	0.0965507				Integrin alpha-V;Integrin alpha-V heavy chain;Integrin alpha-V light chain	Itgav
5096400000	5321600000	5448700000		4533300000	4695300000	4257000000		5096698210	5321898210	5448998210		4533598210	4695598210	4257298210		5289198210	4495498210		0.849939	0.00844956				ATP-dependent 6-phosphofructokinase, liver type	Pfkl
87602000	78147000	60630000		53231000	64639000	74412000		87900210	78445210	60928210		53529210	64937210	74710210		7.57579e+07	64392210		0.849974	0.318958					Pramel3;EG331529;Gm5128;Gm15023;AV320801
909790000	937460000	919420000		866020000	693730000	791990000		910088210	937758210	919718210		866318210	694028210	792288210		9.22522e+08	7.84212e+08		0.850074	0.0521265				[Pyruvate dehydrogenase [acetyl-transferring]]-phosphatase 1, mitochondrial	Pdp1
478550000	420240000	491970000		353270000	408460000	420470000		478848210	420538210	492268210		353568210	408758210	420768210		4.63885e+08	3.94365e+08		0.850135	0.0828514				Tyrosine-protein phosphatase non-receptor type 11	Ptpn11
103410000	136550000	161770000		121160000	111120000	109190000		103708210	136848210	162068210		121458210	111418210	109488210		134208210	1.14122e+08		0.850332	0.310208				Ribosome biogenesis regulatory protein homolog	Rrs1
304360000	294360000	267910000		200770000	299470000	236660000		304658210	294658210	268208210		201068210	299768210	236958210		2.89175e+08	2.45932e+08		0.85046	0.233307				NADH-ubiquinone oxidoreductase chain 3	Mtnd3
723570000	615550000	577970000		515610000	584800000	529940000		723868210	615848210	578268210		515908210	585098210	530238210		639328210	543748210		0.850499	0.119883				Probable ergosterol biosynthetic protein 28	ORF11
44488000	76486000	111320000		66797000	71572000	59070000		44786210	76784210	111618210		67095210	71870210	59368210		7.77295e+07	66111210		0.850529	0.585942				Arachidonate 5-lipoxygenase-activating protein	Alox5ap
4454600000	4666900000	5037800000		4086400000	3847300000	4110800000		4454898210	4667198210	5038098210		4086698210	3847598210	4111098210		4.72006e+09	4.01513e+09		0.850652	0.0206589				Lon protease homolog, mitochondrial	Lonp1
16235000000	17525000000	16366000000		13901000000	14674000000	14077000000		16235298210	17525298210	16366298210		13901298210	14674298210	14077298210		1.6709e+10	1.42176e+10		0.850898	0.00617566				Trifunctional enzyme subunit beta, mitochondrial;3-ketoacyl-CoA thiolase	Hadhb
0	9977500	15656000		0	12807000	8872400		298210	10275710	15954210		298210	13105210	9170610		8842710	7.52468e+06		0.850947	0.83527				Nuclear receptor subfamily 2 group C member 2	Nr2c2
623180000	581020000	630980000		517220000	470510000	573830000		623478210	581318210	631278210		517518210	470808210	574128210		6.12025e+08	520818210		0.850976	0.053564				39S ribosomal protein L4, mitochondrial	Mrpl4
173490000	156610000	160440000		136330000	122220000	158780000		173788210	156908210	160738210		136628210	122518210	159078210		1.63812e+08	139408210		0.851028	0.10763				Ras-related protein Rab-3A	Rab3a
880230000	806860000	1012000000		790530000	750160000	756320000		880528210	807158210	1012298210		790828210	750458210	756618210		8.99995e+08	765968210		0.851081	0.0941172				Exonuclease 3-5 domain-containing protein 2	Exd2
444310000	494140000	493290000		360370000	474200000	384050000		444608210	494438210	493588210		360668210	474498210	384348210		4.77545e+08	4.06505e+08		0.851239	0.13791				Rab9 effector protein with kelch motifs	Rabepk
407040000	417070000	343200000		306250000	304790000	382680000		407338210	417368210	343498210		306548210	305088210	382978210		3.89402e+08	331538210		0.851404	0.16973				Coiled-coil domain-containing protein 124	Ccdc124
95690000	90641000	77724000		90176000	68640000	65878000		95988210	90939210	78022210		90474210	68938210	66176210		8.83165e+07	75196210		0.85144	0.233614				MAU2 chromatid cohesion factor homolog	Mau2
798100000	709980000	921350000		558750000	696620000	813150000		798398210	710278210	921648210		559048210	696918210	813448210		810108210	6.89805e+08		0.851497	0.277226				UPF0505 protein C16orf62 homolog	9030624J02Rik
356480000	344730000	405690000		333490000	315060000	293860000		356778210	345028210	405988210		333788210	315358210	294158210		3.69265e+08	3.14435e+08		0.851516	0.0665319				Putative Dol-P-Glc:Glc(2)Man(9)GlcNAc(2)-PP-Dol alpha-1,2-glucosyltransferase	Alg10b
85879000	95922000	102660000		94564000	71931000	75621000		86177210	96220210	102958210		94862210	72229210	75919210		9.51185e+07	8.10035e+07		0.851606	0.173688				Pleckstrin homology domain-containing family A member 7	Plekha7
140830000	115690000	127210000		109550000	101410000	115710000		141128210	115988210	127508210		109848210	101708210	116008210		128208210	109188210		0.851648	0.0853224				BRISC complex subunit Abro1	Fam175b
5273900000	5893000000	5871100000		4496000000	5186200000	4829900000		5274198210	5893298210	5871398210		4496298210	5186498210	4830198210		5.67963e+09	4.83766e+09		0.851757	0.0415055				Enoyl-CoA hydratase, mitochondrial	Echs1
274270000	243520000	226400000		242290000	136180000	255340000		274568210	243818210	226698210		242588210	136478210	255638210		2.48362e+08	211568210		0.851856	0.412355				28S ribosomal protein S2, mitochondrial	Mrps2
535620000	631270000	697410000		580960000	556820000	450440000		535918210	631568210	697708210		581258210	557118210	450738210		6.21732e+08	5.29705e+08		0.851983	0.210393				Guanine nucleotide-binding protein subunit alpha-14	Gna14
12459000	18952000	16204000		18430000	22010000	0		12757210	19250210	16502210		18728210	22308210	298210		1.61699e+07	13778210		0.852091	0.752282				Very long-chain acyl-CoA synthetase	Slc27a2
4774000000	4923700000	5013600000		4244800000	3879600000	4411400000		4774298210	4923998210	5013898210		4245098210	3879898210	4411698210		4.90406e+09	4178898210		0.852129	0.013491				Proteasome activator complex subunit 1	Psme1
24413000	15572000	18038000		15127000	19174000	15018000		24711210	15870210	18336210		15425210	19472210	15316210		19639210	1.67379e+07		0.852268	0.383633				Tyrosine-protein kinase Fyn;Non-specific protein-tyrosine kinase	Fyn
1521800000	1737900000	1873900000		1448900000	1393800000	1533500000		1522098210	1738198210	1874198210		1449198210	1394098210	1533798210		1711498210	1.45903e+09		0.852488	0.0839044				Oxysterol-binding protein;Oxysterol-binding protein-related protein 11	Osbpl11
129450000	136460000	158500000		112710000	132410000	116670000		129748210	136758210	158798210		113008210	132708210	116968210		141768210	1.20895e+08		0.852764	0.120808				Glycogen phosphorylase, liver form;Alpha-1,4 glucan phosphorylase	Pygl
998850000	818970000	846590000		708040000	801210000	762800000		999148210	819268210	846888210		708338210	801508210	763098210		8.88435e+08	757648210		0.85279	0.10302				Phosphomannomutase;Phosphomannomutase 2	Pmm2
38937000	34985000	29654000		39404000	33218000	15579000		39235210	35283210	29952210		39702210	33516210	15877210		3.48235e+07	2.96985e+07		0.852829	0.538458					4933408B17Rik
509700000	537830000	548090000		469070000	452740000	438970000		509998210	538128210	548388210		469368210	453038210	439268210		5.32172e+08	4.53892e+08		0.852905	0.00555778				Dolichyl-phosphate beta-glucosyltransferase	Alg5
500370000	510100000	558260000		465400000	432310000	440390000		500668210	510398210	558558210		465698210	432608210	440688210		523208210	4.46332e+08		0.853067	0.019888				Arsenite methyltransferase	As3mt
35869000	33830000	33683000		33026000	26566000	28480000		36167210	34128210	33981210		33324210	26864210	28778210		3.47589e+07	2.96555e+07		0.853179	0.0667809				Sorting nexin;Sorting nexin-18	Snx18
94349000	67240000	81974000		72024000	64442000	71264000		94647210	67538210	82272210		72322210	64740210	71562210		8.14859e+07	6.95415e+07		0.853418	0.21885				Transmembrane protein 161B	Tmem161b
165750000	115890000	105670000		83889000	132120000	114410000		166048210	116188210	105968210		84187210	132418210	114708210		1.29402e+08	1.10438e+08		0.853451	0.46137				Polyribonucleotide 5-hydroxyl-kinase Clp1	Clp1
2635900000	3280600000	3514800000		1653100000	3440700000	2957800000		2636198210	3280898210	3515098210		1653398210	3440998210	2958098210		3.14406e+09	2.68416e+09		0.853724	0.48274				Fibrinogen beta chain;Fibrinopeptide B;Fibrinogen beta chain	Fgb
3858200000	4343300000	4989400000		2386500000	4995700000	3880300000		3858498210	4343598210	4989698210		2386798210	4995998210	3880598210		4.39726e+09	3.75446e+09		0.853818	0.478819				Fibrinogen alpha chain;Fibrinopeptide A;Fibrinogen alpha chain	Fga
2517100000	2952200000	3098200000		2602300000	2406000000	2307000000		2517398210	2952498210	3098498210		2602598210	2406298210	2307298210		2.85613e+09	2.43873e+09		0.853858	0.098925				Succinyl-CoA ligase [GDP-forming] subunit beta, mitochondrial	Suclg2
285370000	263440000	322690000		286380000	218370000	239260000		285668210	263738210	322988210		286678210	218668210	239558210		290798210	2.48302e+08		0.853862	0.184411				Protein kinase C iota type	Prkci
9567300000	7704200000	6611200000		7671700000	6354200000	6366900000		9567598210	7704498210	6611498210		7671998210	6354498210	6367198210		7961198210	6797898210		0.853879	0.295449
376360000	369720000	385210000		341990000	302740000	321170000		376658210	370018210	385508210		342288210	303038210	321468210		3.77395e+08	3.22265e+08		0.85392	0.0106466				Integral membrane protein 2B;BRI2, membrane form;BRI2 intracellular domain;BRI2C, soluble form;Bri23 peptide	Itm2b
780270000	629450000	846300000		590100000	700440000	636070000		780568210	629748210	846598210		590398210	700738210	636368210		7.52305e+08	6.42502e+08		0.854044	0.200472				STIP1 homology and U box-containing protein 1	Stub1
815280000	795980000	766950000		585880000	768670000	677000000		815578210	796278210	767248210		586178210	768968210	677298210		7.93035e+08	6.77482e+08		0.85429	0.101778				Dynactin subunit 3	Dctn3
93760000	84786000	108420000		92164000	72208000	80655000		94058210	85084210	108718210		92462210	72506210	80953210		9.59535e+07	8.19739e+07		0.854308	0.195076				Cytochrome c oxidase assembly factor 7	Coa7
301700000	336400000	369730000		207580000	333640000	319720000		301998210	336698210	370028210		207878210	333938210	320018210		3.36242e+08	287278210		0.85438	0.332721				Sperm acrosome-associated protein 5	Spaca5
2824800000	2830900000	2737700000		2329000000	2464500000	2378900000		2825098210	2831198210	2737998210		2329298210	2464798210	2379198210		2798098210	2391098210		0.854544	0.00121254				Propionyl-CoA carboxylase alpha chain, mitochondrial	Pcca
85614000	104020000	146720000		121280000	88954000	77082000		85912210	104318210	147018210		121578210	89252210	77380210		112416210	96070210		0.854594	0.506073				Protein kinase C beta type	Prkcb
23405000	20057000	23739000		26359000	20540000	10407000		23703210	20355210	24037210		26657210	20838210	10705210		2.26985e+07	19400210		0.85469	0.5303				Uncharacterized protein C6orf47 homolog	D17H6S53E;D17h6s53e
1319300000	1574600000	1607600000		1218700000	1461000000	1169100000		1319598210	1574898210	1607898210		1218998210	1461298210	1169398210		1500798210	1.28323e+09		0.855033	0.164875				Thiopurine S-methyltransferase	Tpmt
265290000	346090000	401660000		224360000	342000000	299710000		265588210	346388210	401958210		224658210	342298210	300008210		337978210	288988210		0.85505	0.403167				Coiled-coil domain-containing protein 58	Ccdc58
359950000	318850000	326010000		311180000	273780000	274170000		360248210	319148210	326308210		311478210	274078210	274468210		3.35235e+08	2.86675e+08		0.855146	0.0520014					Akr1b10
133640000	139510000	114330000		116230000	95112000	119920000		133938210	139808210	114628210		116528210	95410210	120218210		129458210	1.10719e+08		0.855248	0.159018				Mitochondrial import inner membrane translocase subunit Tim23	Timm23
133680000	128360000	96948000		91740000	117030000	98188000		133978210	128658210	97246210		92038210	117328210	98486210		1.19961e+08	1.02618e+08		0.855425	0.275574				Muscleblind-like protein 1	Mbnl1
188220000	234230000	180280000		144560000	142560000	228390000		188518210	234528210	180578210		144858210	142858210	228688210		201208210	1.72135e+08		0.855506	0.426839				COMM domain-containing protein 2	Commd2
60430000	67402000	90975000		41060000	73354000	72712000		60728210	67700210	91273210		41358210	73652210	73010210		7.32339e+07	6.26735e+07		0.8558	0.49574				GRB2-associated-binding protein 2	Gab2
907670000	705880000	923240000		555100000	811650000	804420000		907968210	706178210	923538210		555398210	811948210	804718210		8.45895e+08	7.24022e+08		0.855924	0.32849				E3 ubiquitin-protein ligase RBX1;E3 ubiquitin-protein ligase RBX1, N-terminally processed	Rbx1
1666500000	1910800000	2111900000		1405100000	1731900000	1734000000		1666798210	1911098210	2112198210		1405398210	1732198210	1734298210		1896698210	1.62396e+09		0.856206	0.181661				Synapse-associated protein 1	Syap1
665820000	518110000	536750000		526370000	461000000	486440000		666118210	518408210	537048210		526668210	461298210	486738210		573858210	491568210		0.856602	0.176426				SPRY domain-containing protein 4	Spryd4
67284000	78189000	72414000		62995000	57259000	66298000		67582210	78487210	72712210		63293210	57557210	66596210		72927210	62482210		0.856775	0.0639008				Actin-related protein 6	Actr6
209380000	135360000	155300000		117820000	211700000	98868000		209678210	135658210	155598210		118118210	211998210	99166210		166978210	143094210		0.856963	0.59407				Calcium-independent phospholipase A2-gamma	Pnpla8
543920000	568210000	357050000		331580000	473170000	454530000		544218210	568508210	357348210		331878210	473468210	454828210		4.90025e+08	420058210		0.857218	0.431924				Oxygen-dependent coproporphyrinogen-III oxidase, mitochondrial	Cpox
2265200000	2526500000	2448400000		1898300000	2005900000	2302300000		2265498210	2526798210	2448698210		1898598210	2006198210	2302598210		2.41366e+09	2.06913e+09		0.857257	0.0742621				NADPH--cytochrome P450 reductase	Por
39563000	25379000	28443000		37503000	18336000	24102000		39861210	25677210	28741210		37801210	18634210	24400210		3.14265e+07	26945210		0.857403	0.56364				Chromosome alignment-maintaining phosphoprotein 1	Champ1
95321000	94654000	159060000		114440000	113110000	71590000		95619210	94952210	159358210		114738210	113408210	71888210		116643210	1.00012e+08		0.857414	0.550948				Serum paraoxonase/arylesterase 1	Pon1
1410600000	1313500000	1533100000		1126800000	1256500000	1268400000		1410898210	1313798210	1533398210		1127098210	1256798210	1268698210		1.41936e+09	1.21753e+09		0.8578	0.0609593				GDP-fucose protein O-fucosyltransferase 2	Pofut2
552450000	591160000	788140000		668750000	641130000	347120000		552748210	591458210	788438210		669048210	641428210	347418210		6.44215e+08	5.52632e+08		0.857837	0.508084				Alpha-1,3-mannosyl-glycoprotein 4-beta-N-acetylglucosaminyltransferase-like protein MGAT4D	Mgat4d
552690000	611410000	591900000		533700000	468900000	503810000		552988210	611708210	592198210		533998210	469198210	504108210		5.85632e+08	5.02435e+08		0.857937	0.0308933				Vacuolar protein sorting-associated protein 26B	Vps26b
65040000	41607000	63193000		44908000	57517000	43175000		65338210	41905210	63491210		45206210	57815210	43473210		5.69115e+07	4.88315e+07		0.858025	0.409286				Merlin	Nf2
3737400000	4365900000	5343900000		3584300000	3688800000	4266300000		3737698210	4366198210	5344198210		3584598210	3689098210	4266598210		4482698210	3.84676e+09		0.858136	0.283079				Cytochrome c oxidase subunit NDUFA4	Ndufa4
681060000	646930000	778130000		658900000	479180000	669570000		681358210	647228210	778428210		659198210	479478210	669868210		702338210	602848210		0.858345	0.245709				ER membrane protein complex subunit 8	Emc8
41775000	64650000	44031000		35161000	58629000	35229000		42073210	64948210	44329210		35459210	58927210	35527210		50450210	4.33045e+07		0.858362	0.539963				Tudor domain-containing protein 3	Tdrd3
171700000	180330000	215260000		145350000	167990000	173490000		171998210	180628210	215558210		145648210	168288210	173788210		1.89395e+08	1.62575e+08		0.858391	0.166053				Phosphorylated CTD-interacting factor 1	Pcif1
187440000	201650000	170100000		161550000	158900000	159440000		187738210	201948210	170398210		161848210	159198210	159738210		1.86695e+08	1.60262e+08		0.858414	0.0447314				WD repeat-containing protein 91	Wdr91
134010000	97720000	106410000		76527000	96764000	116860000		134308210	98018210	106708210		76825210	97062210	117158210		1.13012e+08	97015210		0.858454	0.373364				Ubiquitin carboxyl-terminal hydrolase 2	Usp2
304040000	290000000	305670000		284760000	258020000	229530000		304338210	290298210	305968210		285058210	258318210	229828210		3.00202e+08	2.57735e+08		0.858539	0.0638238					Ppfia1
329580000	391070000	408100000		322500000	300790000	345790000		329878210	391368210	408398210		322798210	301088210	346088210		376548210	3.23325e+08		0.858655	0.121579				Dehydrogenase/reductase SDR family member 13	Dhrs13
46255000	75852000	62623000		68824000	18799000	70886000		46553210	76150210	62921210		69122210	19097210	71184210		6.18749e+07	5.31345e+07		0.858742	0.670344				Sulfatase-modifying factor 1	Sumf1
277670000	301080000	251580000		253080000	250520000	209370000		277968210	301378210	251878210		253378210	250818210	209668210		2.77075e+08	2.37955e+08		0.858811	0.123812				Protein FAM135A	Fam135a
716650000	673630000	841840000		671840000	571650000	673390000		716948210	673928210	842138210		672138210	571948210	673688210		744338210	639258210		0.858828	0.158202				Exocyst complex component 8	Exoc8
274160000	194860000	179420000		200730000	201180000	154920000		274458210	195158210	179718210		201028210	201478210	155218210		2.16445e+08	185908210		0.858917	0.408668				28S ribosomal protein S16, mitochondrial	Mrps16
0	0	51358000		0	43991000	0		298210	298210	51656210		298210	44289210	298210		1.74175e+07	1.49619e+07		0.859012	0.918495				Alpha-ketoglutarate-dependent dioxygenase alkB homolog 6	Alkbh6
582840000	636690000	597070000		499170000	561480000	500070000		583138210	636988210	597368210		499468210	561778210	500368210		6.05832e+08	520538210		0.859213	0.0311002				Segment polarity protein dishevelled homolog DVL-2	Dvl2
84016000	43578000	59889000		43590000	77180000	40193000		84314210	43876210	60187210		43888210	77478210	40491210		6.27925e+07	5.39525e+07		0.859219	0.62362				Fibronectin type-III domain-containing protein 3A	Fndc3a
275550000	287920000	266490000		236280000	244840000	231900000		275848210	288218210	266788210		236578210	245138210	232198210		2.76952e+08	2.37972e+08		0.859253	0.00587136				Leucine-rich repeat-containing protein 14	Lrrc14
1152700000	1143900000	1137400000		963380000	999290000	988020000		1152998210	1144198210	1137698210		963678210	999588210	988318210		1.14496e+09	9.83862e+08		0.859294	0.000150252				Myotubularin-related protein 5	Sbf1
588300000	495480000	507950000		493170000	430280000	444320000		588598210	495778210	508248210		493468210	430578210	444618210		5.30875e+08	4.56222e+08		0.859377	0.0983304				Mitogen-activated protein kinase kinase kinase kinase 4	Map4k4
27305000	25202000	34005000		25590000	22698000	25933000		27603210	25500210	34303210		25888210	22996210	26231210		2.91355e+07	2.50385e+07		0.859381	0.223346				DnaJ homolog subfamily B member 12	Dnajb12
86650000	72735000	85133000		62378000	54503000	93129000		86948210	73033210	85431210		62676210	54801210	93427210		81804210	7.03015e+07		0.859388	0.412306				Alpha- and gamma-adaptin-binding protein p34	Aagab
3069200000	2783700000	2948600000		2452800000	2650200000	2461700000		3069498210	2783998210	2948898210		2453098210	2650498210	2461998210		2.93413e+09	2.52186e+09		0.859493	0.0170664				Catenin beta-1	Ctnnb1
54829000	55526000	66618000		43936000	50356000	57694000		55127210	55824210	66916210		44234210	50654210	57992210		59289210	50960210		0.859519	0.205287				Meiotic nuclear division protein 1 homolog	Mnd1
762270000	704500000	635300000		626160000	529460000	651110000		762568210	704798210	635598210		626458210	529758210	651408210		700988210	6.02542e+08		0.85956	0.132287				Uncharacterized protein C4orf32 homolog
15087000000	13311000000	13893000000		13569000000	10601000000	12183000000		15087298210	13311298210	13893298210		13569298210	10601298210	12183298210		14097298210	1.2118e+10		0.859595	0.120023				Translin	Tsn
64585000	76719000	57765000		13071000	85164000	72768000		64883210	77017210	58063210		13369210	85462210	73066210		6.66545e+07	57299210		0.859644	0.704225				Protein rogdi homolog	Rogdi
169880000	263470000	190280000		190930000	159800000	185330000		170178210	263768210	190578210		191228210	160098210	185628210		2.08175e+08	1.78985e+08		0.859781	0.385441				Cytochrome c oxidase copper chaperone	COX17;Cox17
2031100000	2231200000	2406300000		1786100000	1942500000	2005400000		2031398210	2231498210	2406598210		1786398210	1942798210	2005698210		2.22316e+09	1.91163e+09		0.859869	0.0694707				Non-specific lipid-transfer protein	Scp2
57608000	63054000	68312000		48949000	63830000	49603000		57906210	63352210	68610210		49247210	64128210	49901210		6.32895e+07	5.44255e+07		0.859945	0.198349				Copper-transporting ATPase 1	Atp7a
25193000	35025000	37779000		37851000	46304000	0		25491210	35323210	38077210		38149210	46602210	298210		3.29639e+07	2.83499e+07		0.860029	0.769905				Histone acetyltransferase KAT8	Kat8
0	0	25144000		0	21500000	0		298210	298210	25442210		298210	21798210	298210		8.67954e+06	7.46488e+06		0.860054	0.917597				Phosphoprotein associated with glycosphingolipid-enriched microdomains 1	Pag1
254490000	247870000	244930000		211820000	225790000	205150000		254788210	248168210	245228210		212118210	226088210	205448210		2.49395e+08	2.14552e+08		0.860288	0.00653552				Importin-13	Ipo13
211100000	197260000	222550000		175670000	187070000	179900000		211398210	197558210	222848210		175968210	187368210	180198210		2.10602e+08	181178210		0.860289	0.0215261				Protein RUFY3	Rufy3
530400000	387990000	402060000		353540000	380610000	401790000		530698210	388288210	402358210		353838210	380908210	402088210		440448210	3.78945e+08		0.860362	0.264305				1,4-alpha-glucan-branching enzyme	Gbe1
90512000	114200000	93145000		80573000	80155000	95464000		90810210	114498210	93443210		80871210	80453210	95762210		9.95839e+07	8.56955e+07		0.860536	0.198856				Inhibitor of nuclear factor kappa-B kinase subunit alpha	Chuk
1242400000	1590100000	1502600000		1272900000	1152400000	1305400000		1242698210	1590398210	1502898210		1273198210	1152698210	1305698210		1.44533e+09	1.24386e+09		0.860609	0.152804				Sorting nexin-5	Snx5
125830000	162080000	179860000		116190000	147010000	139290000		126128210	162378210	180158210		116488210	147308210	139588210		1.56222e+08	1.34462e+08		0.860711	0.302403				Vacuolar-sorting protein SNF8	Snf8
95906000	51343000	42174000		18850000	41420000	102670000		96204210	51641210	42472210		19148210	41718210	102968210		63439210	5.46115e+07		0.860848	0.783483					Wdr75
164230000	167570000	180530000		170770000	151630000	118520000		164528210	167868210	180828210		171068210	151928210	118818210		1.71075e+08	1.47272e+08		0.86086	0.212228				Ubiquitin carboxyl-terminal hydrolase 46	Usp46
94179000	107940000	107650000		101330000	81702000	83570000		94477210	108238210	107948210		101628210	82000210	83868210		1.03555e+08	8.91655e+07		0.861049	0.136108				Dual specificity mitogen-activated protein kinase kinase 3	Map2k3
132320000	70786000	132850000		94489000	66841000	127830000		132618210	71084210	133148210		94787210	67139210	128128210		1.12284e+08	9.66849e+07		0.861078	0.59592				Syntaxin-binding protein 6	Stxbp6
616850000	663260000	601610000		543420000	545050000	532000000		617148210	663558210	601908210		543718210	545348210	532298210		627538210	5.40455e+08		0.86123	0.0101368				Amine oxidase [flavin-containing] A	Maoa
573940000	592160000	625620000		538210000	462460000	542500000		574238210	592458210	625918210		538508210	462758210	542798210		597538210	514688210		0.861348	0.0511411				Protein unc-119 homolog B	Unc119b
1683200000	1220900000	1290600000		1230600000	1306100000	1076900000		1683498210	1221198210	1290898210		1230898210	1306398210	1077198210		1.39853e+09	1.20483e+09		0.861498	0.289851				Glycosylphosphatidylinositol anchor attachment 1 protein	Gpaa1
3862900000	4043300000	4239800000		3369000000	3253800000	3842300000		3863198210	4043598210	4240098210		3369298210	3254098210	3842598210		4.04896e+09	3.48866e+09		0.861619	0.0562129				Transportin-3	Tnpo3
0	21184000	19763000		0	18270000	16893000		298210	21482210	20061210		298210	18568210	17191210		13947210	12019210		0.861764	0.841087				Ras GTPase-activating protein 2	Rasa2
233900000	186280000	201160000		213840000	143600000	177980000		234198210	186578210	201458210		214138210	143898210	178278210		2.07412e+08	1.78772e+08		0.861917	0.31038				Optic atrophy 3 protein homolog	Opa3
102790000	99181000	138370000		75930000	88676000	128700000		103088210	99479210	138668210		76228210	88974210	128998210		113745210	9.80669e+07		0.862163	0.481525				Fetuin-B	Fetub
5371700000	5407000000	5733700000		4497700000	4911100000	4829700000		5371998210	5407298210	5733998210		4497998210	4911398210	4829998210		5.50443e+09	4.74646e+09		0.862299	0.0114156				Ras-related protein Rap-1A	Rap1a
1625900000	1612900000	1713400000		1307000000	1412300000	1550900000		1626198210	1613198210	1713698210		1307298210	1412598210	1551198210		1.65103e+09	1423698210		0.862308	0.0424399				DDB1- and CUL4-associated factor 8	Dcaf8
640370000	537640000	440290000		434800000	453660000	506900000		640668210	537938210	440588210		435098210	453958210	507198210		5.39732e+08	465418210		0.862314	0.294593				Ras-specific guanine nucleotide-releasing factor RalGPS2	Ralgps2
3119200000	2960000000	2938200000		2526200000	2248000000	3002700000		3119498210	2960298210	2938498210		2526498210	2248298210	3002998210		3006098210	2592598210		0.862446	0.143439				Mannosyl-oligosaccharide glucosidase	Mogs
27393000	19592000	19558000		27052000	30222000	0		27691210	19890210	19856210		27350210	30520210	298210		22479210	1.93895e+07		0.862554	0.771391				Equatorin	Eqtn
4815100000	5028400000	5903100000		4291000000	4804800000	4488200000		4815398210	5028698210	5903398210		4291298210	4805098210	4488498210		5.24916e+09	4528298210		0.86267	0.119453				Aspartate aminotransferase, cytoplasmic	Got1
21238000000	26751000000	28079000000		23459000000	20841000000	21330000000		21238298210	26751298210	28079298210		23459298210	20841298210	21330298210		25356298210	2.1877e+10		0.862782	0.195843				3-ketoacyl-CoA thiolase, mitochondrial	Acaa2
650350000	599660000	648120000		522690000	573840000	541070000		650648210	599958210	648418210		522988210	574138210	541368210		633008210	5.46165e+08		0.862809	0.0176248				Calcium/calmodulin-dependent protein kinase type II subunit gamma	Camk2g
2468200000	2035100000	2191800000		2317200000	1618200000	1841100000		2468498210	2035398210	2192098210		2317498210	1618498210	1841398210		2231998210	1925798210		0.862814	0.274325				Protein transport protein Sec61 subunit beta	Sec61b;Gm10320
185870000	257030000	230100000		194840000	177120000	208860000		186168210	257328210	230398210		195138210	177418210	209158210		2.24632e+08	1.93905e+08		0.863213	0.247042				Transmembrane protein 19	Tmem19
121890000	19180000	152620000		13340000	43469000	196600000		122188210	19478210	152918210		13638210	43767210	196898210		9.81949e+07	8.47679e+07		0.863262	0.856461				Alpha/beta hydrolase domain-containing protein 14A	Abhd14a
1833500000	1814800000	1839700000		1372000000	1598100000	1767600000		1833798210	1815098210	1839998210		1372298210	1598398210	1767898210		1.82963e+09	1.57953e+09		0.863306	0.0949623				Glutamine--fructose-6-phosphate aminotransferase [isomerizing] 1	Gfpt1
30565000	54625000	32318000		16412000	44359000	40560000		30863210	54923210	32616210		16710210	44657210	40858210		3.94675e+07	34075210		0.863373	0.668465				G-protein-signaling modulator 2	Gpsm2
176940000	220500000	231630000		152470000	195710000	194830000		177238210	220798210	231928210		152768210	196008210	195128210		209988210	1.81302e+08		0.863389	0.261423				Elongator complex protein 4	Elp4
119330000	132160000	120400000		130310000	42837000	147830000		119628210	132458210	120698210		130608210	43135210	148128210		1.24262e+08	1.07291e+08		0.863425	0.631492				Vasodilator-stimulated phosphoprotein	Vasp
1098000000	1096900000	881400000		877470000	708860000	1070500000		1098298210	1097198210	881698210		877768210	709158210	1070798210		1.02573e+09	885908210		0.863684	0.332347				Protein transport protein Sec61 subunit gamma	Sec61g
314490000	337240000	335160000		287390000	266850000	298160000		314788210	337538210	335458210		287688210	267148210	298458210		3.29262e+08	2.84432e+08		0.863847	0.0186333				Bifunctional methylenetetrahydrofolate dehydrogenase/cyclohydrolase, mitochondrial;NAD-dependent methylenetetrahydrofolate dehydrogenase;Methenyltetrahydrofolate cyclohydrolase	Mthfd2
116420000	132020000	201090000		126000000	131660000	130630000		116718210	132318210	201388210		126298210	131958210	130928210		1.50142e+08	129728210		0.864039	0.477445					Agl
1787000000	2005000000	1919700000		1827300000	1668700000	1439100000		1787298210	2005298210	1919998210		1827598210	1668998210	1439398210		1904198210	1.64533e+09		0.864055	0.115864				TOM1-like protein 2	Tom1l2
32324000	50403000	39410000		36282000	23755000	45382000		32622210	50701210	39708210		36580210	24053210	45680210		4.10105e+07	3.54379e+07		0.864116	0.533261				Arf-GAP with coiled-coil, ANK repeat and PH domain-containing protein 2	Acap2
27158000	22705000	23062000		21431000	20660000	20805000		27456210	23003210	23360210		21729210	20958210	21103210		2.46065e+07	2.12635e+07		0.864142	0.0821509				Succinate dehydrogenase assembly factor 1, mitochondrial	Sdhaf1
17836000	19443000	12457000		21108000	4042400	17709000		18134210	19741210	12755210		21406210	4340610	18007210		1.68769e+07	1.45847e+07		0.864181	0.704591				28S ribosomal protein S18b, mitochondrial	Mrps18b
2464000000	2438300000	2573800000		2171700000	1993900000	2297200000		2464298210	2438598210	2574098210		2171998210	1994198210	2297498210		2.49233e+09	2.15456e+09		0.864478	0.0255558				Src substrate cortactin	Cttn
5127500000	4445000000	4781600000		4300000000	4268400000	3841700000		5127798210	4445298210	4781898210		4300298210	4268698210	3841998210		4784998210	4136998210		0.864577	0.058123				Cytosolic purine 5-nucleotidase	Nt5c2
318200000	331290000	289810000		253680000	302060000	256250000		318498210	331588210	290108210		253978210	302358210	256548210		313398210	2.70962e+08		0.864592	0.100188				LETM1 domain-containing protein 1	Letmd1
2647200000	1843400000	1929300000		2007800000	1537300000	2007000000		2647498210	1843698210	1929598210		2008098210	1537598210	2007298210		2.14026e+09	1850998210		0.864845	0.388322				Small nuclear ribonucleoprotein Sm D1	Snrpd1
813290000	1220000000	1123200000		695620000	1038600000	995580000		813588210	1220298210	1123498210		695918210	1038898210	995878210		1.05246e+09	9.10232e+08		0.86486	0.433047				Haloacid dehalogenase-like hydrolase domain-containing protein 3	Hdhd3
28152000	30120000	33586000		25837000	22102000	31391000		28450210	30418210	33884210		26135210	22400210	31689210		3.09175e+07	2.67415e+07		0.864931	0.253206				OTU domain-containing protein 7B;OTU domain-containing protein 7A	Otud7b;Otud7a
365380000	439330000	382220000		394590000	263910000	368160000		365678210	439628210	382518210		394888210	264208210	368458210		3.95942e+08	342518210		0.865073	0.307678				Sodium/hydrogen exchanger	Slc9a6
247280000	68945000	216940000		175550000	126690000	158910000		247578210	69243210	217238210		175848210	126988210	159208210		1.7802e+08	1.54015e+08		0.865156	0.694925				Basic leucine zipper and W2 domain-containing protein 2	Bzw2
806090000	804320000	669630000		649520000	623510000	699580000		806388210	804618210	669928210		649818210	623808210	699878210		7.60312e+08	6.57835e+08		0.865218	0.111831				General transcription factor IIF subunit 2	Gtf2f2
37718000	49099000	47210000		37736000	24391000	53715000		38016210	49397210	47508210		38034210	24689210	54013210		4.49739e+07	38912210		0.865218	0.545091				RUN and FYVE domain-containing protein 1	Rufy1
27344000	17850000	17734000		17628000	16685000	20018000		27642210	18148210	18032210		17926210	16983210	20316210		21274210	1.84085e+07		0.865299	0.43865					Slc8a2
328550000	130180000	179690000		196860000	153280000	202260000		328848210	130478210	179988210		197158210	153578210	202558210		2.13105e+08	1.84432e+08		0.86545	0.665774				Transmembrane and coiled-coil domain-containing protein 1	Tmco1
2133500000	2224900000	2229800000		1773700000	2117900000	1810200000		2133798210	2225198210	2230098210		1773998210	2118198210	1810498210		2.19636e+09	1900898210		0.865475	0.059935				Sec1 family domain-containing protein 1	Scfd1
9517400000	10886000000	9333200000		8358200000	8538500000	8839600000		9517698210	10886298210	9333498210		8358498210	8538798210	8839898210		9912498210	8.57906e+09		0.86548	0.0589843				Hexokinase-2;Hexokinase	Hk2
12056000000	12868000000	13021000000		11286000000	12119000000	9435600000		12056298210	12868298210	13021298210		11286298210	12119298210	9435898210		1.26486e+10	1.09472e+10		0.865482	0.115149				Glutathione S-transferase A4	Gsta4
115240000	82677000	98506000		76846000	81278000	98404000		115538210	82975210	98804210		77144210	81576210	98702210		9.91059e+07	8.58075e+07		0.865817	0.310834				Coiled-coil domain-containing protein 77	Ccdc77
1194700000	1398500000	1565400000		1303600000	1231500000	1065400000		1194998210	1398798210	1565698210		1303898210	1231798210	1065698210		1386498210	1.20046e+09		0.865825	0.220691				Monocarboxylate transporter 1	Slc16a1
356220000	420930000	361880000		327630000	390440000	268050000		356518210	421228210	362178210		327928210	390738210	268348210		3.79975e+08	3.29005e+08		0.86586	0.281166				Protein SAAL1	Saal1
386910000	254030000	219200000		244760000	264040000	236030000		387208210	254328210	219498210		245058210	264338210	236328210		2.87012e+08	2.48575e+08		0.86608	0.498992				Beta-enolase	Eno3
1023200000	1117400000	1084900000		944400000	955750000	893340000		1023498210	1117698210	1085198210		944698210	956048210	893638210		1.07546e+09	9.31462e+08		0.866101	0.0128382				Isobutyryl-CoA dehydrogenase, mitochondrial	Acad8
20064000	21071000	19596000		20467000	19489000	12524000		20362210	21369210	19894210		20765210	19787210	12822210		2.05419e+07	1.77915e+07		0.866111	0.339507				Overexpressed in colon carcinoma 1 protein homolog
279760000	243990000	268810000		200740000	195840000	289770000		280058210	244288210	269108210		201038210	196138210	290068210		2.64485e+08	2.29082e+08		0.866142	0.334713				Engulfment and cell motility protein 1	Elmo1
593910000	549760000	548380000		518200000	479980000	467600000		594208210	550058210	548678210		518498210	480278210	467898210		5.64315e+08	4.88892e+08		0.866345	0.024142				Protein FAM136A	Fam136a
22192000000	22009000000	25616000000		20088000000	20344000000	20070000000		22192298210	22009298210	25616298210		20088298210	20344298210	20070298210		2.32726e+10	2.01676e+10		0.866581	0.0576101				Fructose-bisphosphate aldolase;Fructose-bisphosphate aldolase A	Aldoa;Aldoart1
77858000	72384000	65471000		60099000	60031000	66703000		78156210	72682210	65769210		60397210	60329210	67001210		7.22025e+07	6.25759e+07		0.866671	0.0842668				Activating signal cointegrator 1	Trip4
835000000	728900000	717300000		689680000	673730000	613880000		835298210	729198210	717598210		689978210	674028210	614178210		760698210	6.59395e+08		0.866828	0.0826623				7-methylguanosine phosphate-specific 5-nucleotidase	Nt5c3b
291640000	300500000	202270000		93835000	142900000	451770000		291938210	300798210	202568210		94133210	143198210	452068210		2.65102e+08	2.298e+08		0.866837	0.77669				Carboxylic ester hydrolase	Ces1b
657300000	665790000	796840000		526950000	697550000	613520000		657598210	666088210	797138210		527248210	697848210	613818210		7.06942e+08	6.12972e+08		0.867075	0.232381				Syntaxin-binding protein 2	Stxbp2
892880000	967990000	1185500000		940150000	728120000	973130000		893178210	968288210	1185798210		940448210	728418210	973428210		1.01575e+09	8.80765e+08		0.867104	0.311341				GTP-binding protein SAR1b	Sar1b
1975100000	2125700000	1806700000		1740900000	1593100000	1788500000		1975398210	2125998210	1806998210		1741198210	1593398210	1788798210		1.96946e+09	1707798210		0.867138	0.074865				Phosphoenolpyruvate carboxykinase [GTP], mitochondrial	Pck2
173510000	189380000	156290000		156950000	146340000	146820000		173808210	189678210	156588210		157248210	146638210	147118210		173358210	1.50335e+08		0.867192	0.0861403				Uncharacterized protein C18orf25 homolog	8030462N17Rik
3069700000	3291500000	3349700000		2799600000	2875700000	2746200000		3069998210	3291798210	3349998210		2799898210	2875998210	2746498210		3.23726e+09	2.80746e+09		0.867234	0.00994853				Microtubule-associated protein 1B;MAP1B heavy chain;MAP1 light chain LC1	Map1b
851200000	848670000	929770000		695810000	715900000	868720000		851498210	848968210	930068210		696108210	716198210	869018210		8.76845e+08	7.60442e+08		0.867248	0.127806				ATP-dependent Clp protease ATP-binding subunit clpX-like, mitochondrial	Clpx
230550000	254090000	280630000		247970000	246330000	169270000		230848210	254388210	280928210		248268210	246628210	169568210		255388210	221488210		0.867261	0.317702					Cyp2d22
2254500000	2228900000	2038300000		1560800000	1755000000	2340500000		2254798210	2229198210	2038598210		1561098210	1755298210	2340798210		2174198210	1.88573e+09		0.867323	0.302692				Up-regulated during skeletal muscle growth protein 5	Usmg5
311170000	259200000	273930000		290200000	207620000	234400000		311468210	259498210	274228210		290498210	207918210	234698210		2.81732e+08	2.44372e+08		0.867391	0.264655				Unconventional myosin-Ib	Myo1b
4734600000	5138400000	4902400000		4095500000	4248200000	4477100000		4734898210	5138698210	4902698210		4095798210	4248498210	4477398210		4.92543e+09	4273898210		0.867721	0.015609				Serine--tRNA ligase, cytoplasmic	Sars
115570000	133530000	76456000		79713000	87196000	115500000		115868210	133828210	76754210		80011210	87494210	115798210		1.08817e+08	9.44345e+07		0.86783	0.513154				Retinitis pigmentosa 9 protein homolog	Rp9;rp9
188690000	138170000	158710000		148850000	160380000	112060000		188988210	138468210	159008210		149148210	160678210	112358210		1.62155e+08	140728210		0.867863	0.358575				Ectonucleoside triphosphate diphosphohydrolase 1	Entpd1
10842000000	10466000000	10985000000		9783800000	8993700000	9248500000		10842298210	10466298210	10985298210		9784098210	8993998210	9248798210		1.07646e+10	9342298210		0.86787	0.00704376				Sodium/potassium-transporting ATPase subunit alpha-1	Atp1a1
1044500000	961290000	1083200000		906470000	896280000	878070000		1044798210	961588210	1083498210		906768210	896578210	878368210		1.02996e+09	8.93905e+08		0.867901	0.0210941				Clathrin light chain B	Cltb
122800000	119620000	119810000		94076000	123360000	96866000		123098210	119918210	120108210		94374210	123658210	97164210		1.21042e+08	1.05066e+08		0.868012	0.164012				Dihydroorotate dehydrogenase (quinone), mitochondrial	Dhodh
9547300000	8816200000	10001000000		8529300000	8173800000	7918700000		9547598210	8816498210	10001298210		8529598210	8174098210	7918998210		9.45513e+09	8.20756e+09		0.868054	0.032397				ATP-binding cassette sub-family D member 3	Abcd3
26430000	33922000	30329000		0	38716000	39882000		26728210	34220210	30627210		298210	39014210	40180210		30525210	2.64975e+07		0.868054	0.776812					Tada2b
29425000	41428000	36243000		34529000	30949000	27376000		29723210	41726210	36541210		34827210	31247210	27674210		3.59969e+07	3.12495e+07		0.868118	0.305421					Ppp2r5b
16154000000	18773000000	19460000000		17354000000	15541000000	14326000000		16154298210	18773298210	19460298210		17354298210	15541298210	14326298210		18129298210	1.57406e+10		0.868243	0.148619				Aldose reductase-related protein 2	Akr1b8
828820000	981860000	943140000		853480000	702450000	835750000		829118210	982158210	943438210		853778210	702748210	836048210		918238210	7.97525e+08		0.868538	0.142301				SH3 domain-binding glutamic acid-rich-like protein	Sh3bgrl
424650000	366600000	317720000		280500000	370190000	312800000		424948210	366898210	318018210		280798210	370488210	313098210		3.69955e+08	3.21462e+08		0.868921	0.29762				Protein KIAA0100	Kiaa0100
639990000	517880000	602820000		473470000	545130000	511420000		640288210	518178210	603118210		473768210	545428210	511718210		5.87195e+08	5.10305e+08		0.869055	0.138586				Protein EFR3 homolog A	Efr3a
354840000	304140000	363670000		306960000	287650000	294050000		355138210	304438210	363968210		307258210	287948210	294348210		3.41182e+08	296518210		0.869092	0.0827093				DnaJ homolog subfamily C member 9	Dnajc9
140000000	74477000	84983000		89220000	85793000	85141000		140298210	74775210	85281210		89518210	86091210	85439210		100118210	87016210		0.869135	0.554871				Anion exchange protein 2	Slc4a2
470230000	479640000	716710000		438040000	531100000	479290000		470528210	479938210	717008210		438338210	531398210	479588210		5.55825e+08	483108210		0.869173	0.440561				TSC22 domain family protein 1	Tsc22d1
695520000	615300000	660010000		519290000	585620000	608020000		695818210	615598210	660308210		519588210	585918210	608318210		6.57242e+08	5.71275e+08		0.869201	0.0717368				Peroxisomal targeting signal 1 receptor	Pex5
417980000	417980000	404680000		388520000	273810000	416190000		418278210	418278210	404978210		388818210	274108210	416488210		4.13845e+08	3.59805e+08		0.86942	0.284927				Prefoldin subunit 3	Vbp1
3173700000	3673200000	3426500000		2717200000	2957000000	3258700000		3173998210	3673498210	3426798210		2717498210	2957298210	3258998210		3.42476e+09	2.97793e+09		0.869529	0.103816				Septin-14	2014-09-01
4434700000	4089500000	3946000000		3191800000	3738300000	3914200000		4434998210	4089798210	3946298210		3192098210	3738598210	3914498210		4.15703e+09	3.61506e+09		0.869627	0.106838				Eukaryotic translation initiation factor 6	Eif6
180640000	136460000	194390000		99874000	171340000	173500000		180938210	136758210	194688210		100172210	171638210	173798210		1.70795e+08	148536210		0.869676	0.497183				Tectonin beta-propeller repeat-containing protein 1	Tecpr1
517080000	392320000	533560000		344150000	471650000	439590000		517378210	392618210	533858210		344448210	471948210	439888210		4.81285e+08	4.18762e+08		0.870091	0.347377				Acyl-protein thioesterase 2	Lypla2
238160000	213730000	123390000		207220000	90617000	202760000		238458210	214028210	123688210		207518210	90915210	203058210		192058210	1.67164e+08		0.870381	0.655342				Non-histone chromosomal protein HMG-17	Hmgn2;Gm16494;Gm6594
45296000	40956000	53054000		33667000	59751000	27720000		45594210	41254210	53352210		33965210	60049210	28018210		4.67335e+07	4.06775e+07		0.870414	0.593442				Nectin-3	Pvrl3
9894000000	8569500000	10275000000		8524400000	9210700000	7281700000		9894298210	8569798210	10275298210		8524698210	9210998210	7281998210		9579798210	8.33923e+09		0.870502	0.180367				Methylmalonate-semialdehyde dehydrogenase [acylating], mitochondrial	Aldh6a1
1280500000	1373500000	1191000000		1043600000	1070400000	1233000000		1280798210	1373798210	1191298210		1043898210	1070698210	1233298210		1.28196e+09	1.11596e+09		0.870511	0.104223				Uroporphyrinogen decarboxylase	Urod
185370000	202740000	216410000		148620000	178600000	198910000		185668210	203038210	216708210		148918210	178898210	199208210		2.01805e+08	1.75675e+08		0.870518	0.202218				Plasminogen receptor (KT)	Plgrkt
160070000	186230000	209950000		145730000	153810000	184600000		160368210	186528210	210248210		146028210	154108210	184898210		1.85715e+08	161678210		0.870572	0.266893				Intraflagellar transport protein 52 homolog	Ift52
157740000	162850000	162680000		141450000	143600000	135560000		158038210	163148210	162978210		141748210	143898210	135858210		161388210	1.40502e+08		0.870581	0.00204677				Tetratricopeptide repeat protein 33	Ttc33
0	4141100	0		3490200	0	0		298210	4439310	298210		3788410	298210	298210		1.67858e+06	1461610		0.870744	0.91013				Nuclear receptor corepressor 1	Ncor1
14006000000	9642700000	9509000000		10259000000	9374500000	9248600000		14006298210	9642998210	9509298210		10259298210	9374798210	9248898210		1.10529e+10	9.62766e+09		0.871056	0.398988
20539000	0	0		17778000	0	0		20837210	298210	298210		18076210	298210	298210		7.14454e+06	6224210		0.871184	0.923933				MKL/myocardin-like protein 2	Mkl2
245850000	241070000	204500000		193840000	251560000	156850000		246148210	241368210	204798210		194138210	251858210	157148210		2.30772e+08	201048210		0.8712	0.384914				UPF0565 protein C2orf69 homolog
398170000	362590000	391110000		264870000	351890000	386640000		398468210	362888210	391408210		265168210	352188210	386938210		3.84255e+08	3.34765e+08		0.871205	0.26073				Complement factor D	Cfd
9377400000	12189000000	11272000000		9804300000	9844200000	8966600000		9377698210	12189298210	11272298210		9804598210	9844498210	8966898210		1.09464e+10	9.53866e+09		0.871395	0.183276				Glutathione S-transferase P 1;Glutathione S-transferase P 2	Gstp1;Gstp2
416640000	344430000	405100000		352090000	318190000	345800000		416938210	344728210	405398210		352388210	318488210	346098210		3.89022e+08	3.38992e+08		0.871395	0.112762				Ectopic P granules protein 5 homolog	Epg5
762350000	599470000	677960000		633490000	586620000	557300000		762648210	599768210	678258210		633788210	586918210	557598210		6.80225e+08	592768210		0.87143	0.167894				Tetratricopeptide repeat protein 38	Ttc38
324260000	366640000	364520000		342160000	259840000	317840000		324558210	366938210	364818210		342458210	260138210	318138210		3.52105e+08	3.06912e+08		0.871648	0.182324				Rho guanine nucleotide exchange factor 1	Arhgef1
217080000	311980000	310300000		267910000	0	463650000		217378210	312278210	310598210		268208210	298210	463948210		2.80085e+08	2.44152e+08		0.871706	0.807412				Tyrosine-protein kinase receptor;Insulin-like growth factor 1 receptor;Insulin-like growth factor 1 receptor alpha chain;Insulin-like growth factor 1 receptor beta chain	Igf1r
248050000	196750000	195900000		183370000	197530000	177550000		248348210	197048210	196198210		183668210	197828210	177848210		2.13865e+08	186448210		0.871804	0.207147				Diacylglycerol kinase epsilon	Dgke
211800000	343310000	195960000		194510000	180620000	279650000		212098210	343608210	196258210		194808210	180918210	279948210		2.50655e+08	218558210		0.871949	0.597404				FSD1-like protein	Fsd1l
805200000	909560000	849510000		668540000	780270000	787090000		805498210	909858210	849808210		668838210	780568210	787388210		8.55055e+08	745598210		0.871989	0.0887888				Elongation factor G, mitochondrial	Gfm1
3721600000	3929900000	3951100000		3176200000	3570800000	3370400000		3721898210	3930198210	3951398210		3176498210	3571098210	3370698210		3.86783e+09	3.37276e+09		0.872004	0.0216603				Dynein light chain 2, cytoplasmic	Dynll2
9726700000	9185700000	11361000000		8847000000	9526100000	8027700000		9726998210	9185998210	11361298210		8847298210	9526398210	8027998210		1.00914e+10	8.80056e+09		0.872083	0.175147				Xaa-Pro aminopeptidase 1	Xpnpep1
1311000000	1392800000	1443900000		1147800000	1178100000	1291200000		1311298210	1393098210	1444198210		1148098210	1178398210	1291498210		1.38286e+09	1205998210		0.872101	0.0386934				Zyxin	Zyx
5494200000	6555900000	5932400000		5395600000	5136200000	5150900000		5494498210	6556198210	5932698210		5395898210	5136498210	5151198210		5.99446e+09	5.22786e+09		0.872115	0.074297				FAS-associated factor 2	Faf2
137350000	134050000	122430000		128840000	90085000	124440000		137648210	134348210	122728210		129138210	90383210	124738210		1.31575e+08	114753210		0.872151	0.267194				Protein unc-119 homolog A	Unc119
237670000	260040000	241380000		221800000	213090000	209750000		237968210	260338210	241678210		222098210	213388210	210048210		2.46662e+08	215178210		0.872362	0.015639				Glycogen synthase kinase-3 beta	Gsk3b
1428500000	1198600000	1487800000		952370000	1497900000	1139500000		1428798210	1198898210	1488098210		952668210	1498198210	1139798210		1.37193e+09	1196888210		0.872411	0.392362				Angiotensin-converting enzyme;Angiotensin-converting enzyme, soluble form	Ace
3637500000	4097600000	4339300000		3376300000	3787800000	3370500000		3637798210	4097898210	4339598210		3376598210	3788098210	3370798210		4025098210	3.51183e+09		0.872483	0.10717				Cyclin-dependent-like kinase 5	Cdk5
572100000	420410000	456760000		496650000	300980000	466720000		572398210	420708210	457058210		496948210	301278210	467018210		483388210	421748210		0.872483	0.463471				Opioid growth factor receptor	Ogfr
68577000	62824000	67990000		53937000	49162000	70760000		68875210	63122210	68288210		54235210	49460210	71058210		6.67619e+07	58251210		0.872522	0.278948				N-acetylglucosamine-1-phosphodiester alpha-N-acetylglucosaminidase	Nagpa
92258000	124100000	165540000		105440000	119650000	108100000		92556210	124398210	165838210		105738210	119948210	108398210		1.27598e+08	1.11362e+08		0.872756	0.495161				Small muscular protein	Smpx
81779000	93234000	83425000		74177000	82304000	68976000		82077210	93532210	83723210		74475210	82602210	69274210		86444210	7.54505e+07		0.872824	0.105535				Transmembrane protein 222	Tmem222
103600000	118010000	122690000		102390000	88081000	109960000		103898210	118308210	122988210		102688210	88379210	110258210		1.15065e+08	1.00442e+08		0.872915	0.164711				Neurochondrin	Ncdn
248360000	261760000	217200000		172760000	225380000	236690000		248658210	262058210	217498210		173058210	225678210	236988210		242738210	211908210		0.872991	0.263379				Phosphoinositide phospholipase C;1-phosphatidylinositol 4,5-bisphosphate phosphodiesterase eta-1	Plch1
826310000	875050000	797160000		641740000	768310000	771150000		826608210	875348210	797458210		642038210	768608210	771448210		833138210	7.27365e+08		0.873042	0.0939049				Eukaryotic translation initiation factor 2 subunit 3, Y-linked	Eif2s3y
2849100000	3199700000	3565900000		2460600000	2983400000	2950600000		2849398210	3199998210	3566198210		2460898210	2983698210	2950898210		3205198210	2798498210		0.873112	0.202672				Galectin-1	Lgals1
559010000	594430000	702540000		557460000	489040000	574050000		559308210	594728210	702838210		557758210	489338210	574348210		618958210	5.40482e+08		0.873212	0.194458				Coiled-coil domain-containing protein 115	Ccdc115
607960000	601630000	645180000		508670000	579210000	531630000		608258210	601928210	645478210		508968210	579508210	531928210		6.18555e+08	5.40135e+08		0.873221	0.0342004				von Willebrand factor A domain-containing protein 8	Vwa8
315010000	274750000	294350000		241430000	257240000	273320000		315308210	275048210	294648210		241728210	257538210	273618210		2.95002e+08	257628210		0.873311	0.0653184				Peroxisomal membrane protein PEX13	Pex13
1455000000	1312900000	1245600000		1056200000	1237900000	1211100000		1455298210	1313198210	1245898210		1056498210	1238198210	1211398210		1.33813e+09	1168698210		0.873381	0.113145				Xaa-Pro dipeptidase	Pepd
2314600000	2062900000	2349400000		1771600000	2089100000	2014500000		2314898210	2063198210	2349698210		1771898210	2089398210	2014798210		2242598210	1958698210		0.873406	0.0972903				ATP synthase subunit g, mitochondrial	Atp5l
152690000	156450000	149080000		143320000	124010000	132800000		152988210	156748210	149378210		143618210	124308210	133098210		153038210	1.33675e+08		0.873474	0.0316285				Guanine nucleotide-binding protein-like 3	Gnl3
5275100000	5796700000	4701700000		4319000000	4557800000	4901100000		5275398210	5796998210	4701998210		4319298210	4558098210	4901398210		5.25813e+09	4.59293e+09		0.873491	0.137124				Isoleucine--tRNA ligase, mitochondrial	Iars2
27651000	32240000	51204000		0	63495000	33435000		27949210	32538210	51502210		298210	63793210	33733210		3.73299e+07	32608210		0.873515	0.822397				Acyl-CoA-binding domain-containing protein 7	Acbd7
2559500000	1676200000	3384600000		2994600000	1572200000	2090300000		2559798210	1676498210	3384898210		2994898210	1572498210	2090598210		2540398210	2.21933e+09		0.873616	0.644776				Astrocytic phosphoprotein PEA-15	Pea15;Pea15a
2278700000	2384400000	1909500000		1870300000	1630400000	2241500000		2278998210	2384698210	1909798210		1870598210	1630698210	2241798210		2.19116e+09	1.91436e+09		0.873674	0.292856				SPARC	Sparc
15341000	13701000	0		13346000	11915000	0		15639210	13999210	298210		13644210	12213210	298210		9.97888e+06	8.71854e+06		0.8737	0.854512				SPRY domain-containing SOCS box protein 2	Spsb2
817210000	769680000	708530000		699300000	584680000	721680000		817508210	769978210	708828210		699598210	584978210	721978210		765438210	6.68852e+08		0.873815	0.141452				RAC-beta serine/threonine-protein kinase	Akt2
1242500000	1333500000	1467100000		1179800000	1073400000	1280100000		1242798210	1333798210	1467398210		1180098210	1073698210	1280398210		1347998210	1.17806e+09		0.873937	0.126951				Methylthioribulose-1-phosphate dehydratase	Apip
1449200000	1174600000	2155700000		1559700000	1438600000	1178800000		1449498210	1174898210	2155998210		1559998210	1438898210	1179098210		1.59346e+09	1.39266e+09		0.873985	0.556188				Apolipoprotein A-II;Proapolipoprotein A-II	Apoa2
1370600000	1454800000	1653200000		1253100000	1327800000	1333300000		1370898210	1455098210	1653498210		1253398210	1328098210	1333598210		1.49316e+09	1.30503e+09		0.874004	0.0984382				Alpha-mannosidase 2	Man2a1
567690000	478280000	574870000		433130000	454490000	528920000		567988210	478578210	575168210		433428210	454788210	529218210		540578210	472478210		0.874024	0.184523				Alpha/beta hydrolase domain-containing protein 14B	Abhd14b
116130000	128470000	144590000		95208000	81632000	163210000		116428210	128768210	144888210		95506210	81930210	163508210		130028210	113648210		0.874027	0.570615				BRCA1-A complex subunit RAP80	Uimc1
2497800000	2439000000	2783200000		2299300000	2104600000	2345800000		2498098210	2439298210	2783498210		2299598210	2104898210	2346098210		2.57363e+09	2250198210		0.874328	0.0668725				Zinc-binding alcohol dehydrogenase domain-containing protein 2	Zadh2
452000000	387780000	341120000		373040000	329410000	329950000		452298210	388078210	341418210		373338210	329708210	330248210		3.93932e+08	3.44432e+08		0.874344	0.232841				2-methoxy-6-polyprenyl-1,4-benzoquinol methylase, mitochondrial	Coq5
1184800000	1364800000	1270500000		1051100000	1279100000	1010100000		1185098210	1365098210	1270798210		1051398210	1279398210	1010398210		1.27366e+09	1.11373e+09		0.874431	0.179787				Transmembrane protein 114	Tmem114
1707300000	2049400000	2653200000		1685300000	2236400000	1683300000		1707598210	2049698210	2653498210		1685598210	2236698210	1683598210		2.13693e+09	1.86863e+09		0.874446	0.464536				Apolipoprotein E	Apoe
454060000	529630000	467500000		425610000	423400000	419880000		454358210	529928210	467798210		425908210	423698210	420178210		484028210	4.23262e+08		0.874456	0.0597922				Succinate-semialdehyde dehydrogenase, mitochondrial	Aldh5a1
371770000	337290000	347190000		278050000	306270000	339240000		372068210	337588210	347488210		278348210	306568210	339538210		3.52382e+08	3.08152e+08		0.874483	0.0964421				Actin-related protein 5	Actr5
36542000	23755000	31335000		35972000	19898000	24163000		36840210	24053210	31633210		36270210	20196210	24461210		30842210	2.69759e+07		0.874641	0.559032				Doublesex- and mab-3-related transcription factor C2	Dmrtc2
442410000	402730000	526510000		471300000	529800000	198800000		442708210	403028210	526808210		471598210	530098210	199098210		4.57515e+08	4.00265e+08		0.874867	0.625108				Myoferlin	Myof
723370000	657640000	655170000		578570000	589150000	613850000		723668210	657938210	655468210		578868210	589448210	614148210		6.79025e+08	5.94155e+08		0.875012	0.0262491					Fryl
57851000	45975000	60008000		43046000	37001000	63203000		58149210	46273210	60306210		43344210	37299210	63501210		5.49095e+07	48048210		0.875043	0.490262				Protein LMBR1L;Limb region 1 protein	Lmbr1;Lmbr1l
412580000	486070000	447910000		376100000	372400000	429830000		412878210	486368210	448208210		376398210	372698210	430128210		4.49152e+08	3.93075e+08		0.87515	0.117551				Protein WWC2	Wwc2
471980000	450860000	604100000		335460000	436370000	564970000		472278210	451158210	604398210		335758210	436668210	565268210		509278210	445898210		0.875549	0.482274				BAG family molecular chaperone regulator 2	Bag2
573240000	463430000	422290000		471990000	347580000	457780000		573538210	463728210	422588210		472288210	347878210	458078210		486618210	4.26082e+08		0.875597	0.368617				Phosphatidylinositol 5-phosphate 4-kinase type-2 gamma	Pip4k2c
639960000	675340000	656150000		540190000	552280000	633670000		640258210	675638210	656448210		540488210	552578210	633968210		657448210	575678210		0.875625	0.0581454				Methyltransferase-like protein;Methyltransferase-like protein 16	Mettl16
140860000	161590000	152760000		128450000	141130000	128970000		141158210	161888210	153058210		128748210	141428210	129268210		1.52035e+08	133148210		0.875774	0.0607767				Phosphatidylinositol-glycan-specific phospholipase D	Gpld1
186620000	151260000	181660000		147540000	160480000	146870000		186918210	151558210	181958210		147838210	160778210	147168210		173478210	151928210		0.875777	0.144585				Transmembrane emp24 domain-containing protein 1	Tmed1
3272400000	2811700000	2592000000		2484000000	2988600000	2131200000		3272698210	2811998210	2592298210		2484298210	2988898210	2131498210		2.89233e+09	2534898210		0.87642	0.325928				Cell adhesion molecule 1	Cadm1
195830000	176890000	173340000		144530000	207380000	126600000		196128210	177188210	173638210		144828210	207678210	126898210		182318210	1.59802e+08		0.876498	0.426556				Homologous-pairing protein 2 homolog	Psmc3ip
277050000	333610000	373720000		275070000	254800000	332850000		277348210	333908210	374018210		275368210	255098210	333148210		3.28425e+08	2.87872e+08		0.876522	0.328949				Peptidyl-tRNA hydrolase 2, mitochondrial	Ptrh2
46296000000	49910000000	51530000000		45999000000	43763000000	39753000000		46296298210	49910298210	51530298210		45999298210	43763298210	39753298210		4.92456e+10	4.3172e+10		0.876666	0.0641912				L-lactate dehydrogenase B chain;L-lactate dehydrogenase	Ldhb
649700000	687050000	631580000		604100000	541260000	580150000		649998210	687348210	631878210		604398210	541558210	580448210		656408210	575468210		0.876693	0.0299617				Sphingosine kinase 2	Sphk2
73829000	72374000	68515000		53938000	72381000	61829000		74127210	72672210	68813210		54236210	72679210	62127210		7.18709e+07	63014210		0.87677	0.1872				Protein KASH5	Ccdc155
55904000	81577000	62171000		58094000	69603000	47320000		56202210	81875210	62469210		58392210	69901210	47618210		6.68489e+07	58637210		0.877161	0.459981				E3 ubiquitin-protein ligase TRIM32	Trim32
102190000	81823000	82454000		84229000	71783000	77671000		102488210	82121210	82752210		84527210	72081210	77969210		8.91205e+07	7.81925e+07		0.87738	0.223408				Cytochrome P450 20A1	Cyp20a1
5511800000	6249800000	5794100000		5135900000	5145100000	5128500000		5512098210	6250098210	5794398210		5136198210	5145398210	5128798210		5852198210	5136798210		0.877755	0.029195				Acidic leucine-rich nuclear phosphoprotein 32 family member B	Anp32b
2407200000	2632200000	2844000000		2413000000	2372700000	2133900000		2407498210	2632498210	2844298210		2413298210	2372998210	2134198210		2628098210	2.30683e+09		0.877757	0.104105				Dihydropyrimidinase-related protein 4	Dpysl4
928810000	810760000	833720000		740030000	742750000	775960000		929108210	811058210	834018210		740328210	743048210	776258210		8.58062e+08	7.53212e+08		0.877806	0.0506535				Breast carcinoma-amplified sequence 3 homolog	Bcas3
16680000	0	94999000		97929000	0	0		16978210	298210	95297210		98227210	298210	298210		3.75245e+07	32941210		0.877858	0.921793				Histone-lysine N-methyltransferase EHMT1	Ehmt1
267550000	274240000	202340000		216590000	232500000	204080000		267848210	274538210	202638210		216888210	232798210	204378210		2.48342e+08	2.18022e+08		0.87791	0.281251				E3 ubiquitin-protein ligase AMFR	Amfr
946270000	859280000	873270000		675240000	777360000	899070000		946568210	859578210	873568210		675538210	777658210	899368210		893238210	784188210		0.877916	0.194738				Peptidyl-prolyl cis-trans isomerase FKBP8	Fkbp8
9984800000	9939100000	11498000000		9715800000	8692500000	9179900000		9985098210	9939398210	11498298210		9716098210	8692798210	9180198210		1.04743e+10	9.19636e+09		0.877996	0.0967711				NADH-cytochrome b5 reductase 3;NADH-cytochrome b5 reductase 3 membrane-bound form;NADH-cytochrome b5 reductase 3 soluble form;NADH-cytochrome b5 reductase	Cyb5r3
674540000	671650000	798650000		577640000	750630000	554810000		674838210	671948210	798948210		577938210	750928210	555108210		7.15245e+08	6.27992e+08		0.878009	0.30743				Guanine nucleotide-binding protein subunit gamma;Guanine nucleotide-binding protein G(I)/G(S)/G(O) subunit gamma-5	Gng5
121880000	123600000	107450000		40327000	133430000	136020000		122178210	123898210	107748210		40625210	133728210	136318210		1.17942e+08	103557210		0.878038	0.675305				Hydroxyacylglutathione hydrolase-like protein	Haghl
2771100000	2612400000	2315800000		2053200000	2364000000	2343400000		2771398210	2612698210	2316098210		2053498210	2364298210	2343698210		2.56673e+09	2.25383e+09		0.878094	0.134173				Vacuolar protein sorting-associated protein 29	Vps29
2501600000	2703800000	2415000000		2283300000	2005100000	2403800000		2501898210	2704098210	2415298210		2283598210	2005398210	2404098210		2.54043e+09	2.23103e+09		0.87821	0.101114				Vesicle-associated membrane protein 3	Vamp3
440650000	514020000	514540000		409570000	419200000	461410000		440948210	514318210	514838210		409868210	419498210	461708210		4.90035e+08	430358210		0.87822	0.110955				General transcription factor IIH subunit 2	Gtf2h2
94901000	89524000	91059000		64262000	71404000	106230000		95199210	89822210	91357210		64560210	71702210	106528210		92126210	80930210		0.878471	0.439692				Phosducin-like protein 3	Pdcl3
1431400000	1378000000	1449800000		1225000000	904640000	1611900000		1431698210	1378298210	1450098210		1225298210	904938210	1612198210		1.42003e+09	1247478210		0.878486	0.44855				Small acidic protein	Smap;1110004F10Rik
3215900000	3416600000	3810100000		2906700000	3159100000	3108400000		3216198210	3416898210	3810398210		2906998210	3159398210	3108698210		3.48116e+09	3.05836e+09		0.878546	0.0910012				Apoptosis-inducing factor 1, mitochondrial	Aifm1
681620000	787990000	793090000		615510000	715100000	657200000		681918210	788288210	793388210		615808210	715398210	657498210		7.54532e+08	6.62902e+08		0.87856	0.119588				Protein LYRIC	Mtdh
208280000	209100000	175810000		112030000	175680000	233340000		208578210	209398210	176108210		112328210	175978210	233638210		198028210	1.73982e+08		0.878569	0.548182				Amyloid beta A4 precursor protein-binding family A member 1	Apba1
61290000	59343000	79007000		54650000	73872000	46786000		61588210	59641210	79305210		54948210	74170210	47084210		6.68449e+07	58734210		0.878664	0.470661				1-phosphatidylinositol 4,5-bisphosphate phosphodiesterase beta-3	Plcb3
1272900000	957390000	1308900000		953550000	941520000	1214900000		1273198210	957688210	1309198210		953848210	941818210	1215198210		1180028210	1.03695e+09		0.878754	0.373392				Probable D-tyrosyl-tRNA(Tyr) deacylase 2	Dtd2
9006500000	8971600000	9346500000		8225800000	7721000000	8069200000		9006798210	8971898210	9346798210		8226098210	7721298210	8069498210		9108498210	8.00563e+09		0.878919	0.0044828				Microtubule-associated protein 4	Map4
576340000	598980000	608590000		504080000	481990000	582590000		576638210	599278210	608888210		504378210	482288210	582888210		5.94935e+08	5.23185e+08		0.879399	0.0883186				DENN domain-containing protein 5B	Dennd5b
1258100000	1444700000	1177900000		1120100000	1049300000	1243200000		1258398210	1444998210	1178198210		1120398210	1049598210	1243498210		1.29386e+09	1.13783e+09		0.879405	0.183842				Actin-related protein 10	Actr10
384070000	396590000	507490000		383650000	246670000	502690000		384368210	396888210	507788210		383948210	246968210	502988210		4.29682e+08	377968210		0.879647	0.570216				Ras-related protein R-Ras	Rras
111310000	109750000	112140000		102020000	98410000	92579000		111608210	110048210	112438210		102318210	98708210	92877210		1.11365e+08	9.79679e+07		0.879702	0.00917024				Uncharacterized protein FLJ45252 homolog
547030000	165640000	446220000		850050000	169450000	0		547328210	165938210	446518210		850348210	169748210	298210		3.86595e+08	3.40132e+08		0.879814	0.877854				Protein-tyrosine-phosphatase;Receptor-type tyrosine-protein phosphatase gamma	Ptprg
31336000	25083000	26825000		19903000	27020000	26209000		31634210	25381210	27123210		20201210	27318210	26507210		28046210	2.46755e+07		0.879817	0.312747				tRNA pseudouridine synthase;tRNA pseudouridine synthase A, mitochondrial	Pus1
317340000	212350000	270720000		270900000	206280000	226990000		317638210	212648210	271018210		271198210	206578210	227288210		2.67102e+08	2.35022e+08		0.879896	0.421472				Serine/threonine-protein kinase 10	Stk10
2240900000	2111600000	2503500000		2353800000	1982300000	1697000000		2241198210	2111898210	2503798210		2354098210	1982598210	1697298210		2.28563e+09	2.01133e+09		0.879989	0.284903				5(3)-deoxyribonucleotidase, cytosolic type	Nt5c
2328200000	2359000000	2488100000		1970800000	2247500000	2095800000		2328498210	2359298210	2488398210		1971098210	2247798210	2096098210		2.39206e+09	2104998210		0.879992	0.0376477				Sorting nexin-3	Snx3
85053000	81457000	90467000		57288000	87426000	81362000		85351210	81755210	90765210		57586210	87724210	81660210		85957210	7.56569e+07		0.880169	0.342312				Tripeptidyl-peptidase 2	Tpp2
1412100000	1327900000	1398100000		1174100000	1179800000	1289300000		1412398210	1328198210	1398398210		1174398210	1180098210	1289598210		1.37966e+09	1214698210		0.88043	0.022479				GTPase-activating protein and VPS9 domain-containing protein 1	Gapvd1
1489700000	1409000000	1277600000		1354100000	1108500000	1214600000		1489998210	1409298210	1277898210		1354398210	1108798210	1214898210		1392398210	1.22603e+09		0.880518	0.152205				Vacuolar protein sorting-associated protein 13C	Vps13c
491220000	553040000	474000000		425890000	403310000	507720000		491518210	553338210	474298210		426188210	403608210	508018210		5.06385e+08	445938210		0.880631	0.203187				Ribosomal protein S6 kinase alpha-5	Rps6ka5
241600000	196430000	272180000		211400000	229870000	184060000		241898210	196728210	272478210		211698210	230168210	184358210		2.37035e+08	2.08742e+08		0.880636	0.332945				Zinc finger protein 622	Znf622
9939200000	9531000000	10494000000		9189800000	8922100000	8278900000		9939498210	9531298210	10494298210		9190098210	8922398210	8279198210		9.98836e+09	8.79723e+09		0.880748	0.037442				Alcohol dehydrogenase [NADP(+)]	Akr1a1
36794000	32357000	38045000		38664000	27709000	27938000		37092210	32655210	38343210		38962210	28007210	28236210		36030210	31735210		0.880794	0.343925				Pantothenate kinase 3	Pank3
707760000	548500000	535770000		456400000	593380000	528650000		708058210	548798210	536068210		456698210	593678210	528948210		5.97642e+08	5.26442e+08		0.880865	0.354293				8-oxo-dGDP phosphatase NUDT18	Nudt18
54864000	72494000	65784000		54982000	64204000	50866000		55162210	72792210	66082210		55280210	64502210	51164210		6.46789e+07	56982210		0.881002	0.300401				Biotin--protein ligase;Biotin--[methylmalonyl-CoA-carboxytransferase] ligase;Biotin--[propionyl-CoA-carboxylase [ATP-hydrolyzing]] ligase;Biotin--[methylcrotonoyl-CoA-carboxylase] ligase;Biotin--[acetyl-CoA-carboxylase] ligase	Hlcs
191140000	210960000	208370000		204790000	169480000	163500000		191438210	211258210	208668210		205088210	169778210	163798210		203788210	1.79555e+08		0.881086	0.165525				39S ribosomal protein L44, mitochondrial	Mrpl44
463510000	498820000	503160000		480000000	373200000	437940000		463808210	499118210	503458210		480298210	373498210	438238210		4.88795e+08	430678210		0.881102	0.15782				Protein PBDC1	Pbdc1
80362000	97721000	70851000		43134000	80386000	95756000		80660210	98019210	71149210		43432210	80684210	96054210		83276210	73390210		0.881287	0.602129				Mitochondrial tRNA-specific 2-thiouridylase 1	Trmu
75370000	24387000	74006000		52826000	59361000	40847000		75668210	24685210	74304210		53124210	59659210	41145210		58219210	5.13095e+07		0.881316	0.715036				Phosphatidylserine synthase 1	Ptdss1
1240100000	1300800000	1292700000		1109600000	1119300000	1149700000		1240398210	1301098210	1292998210		1109898210	1119598210	1149998210		1.27816e+09	1126498210		0.88134	0.00254015				Catenin alpha-1	Ctnna1
62049000	79908000	69820000		64442000	54028000	68111000		62347210	80206210	70118210		64740210	54326210	68409210		7.08905e+07	6.24919e+07		0.881526	0.276578				Galectin-related protein	Lgalsl
514360000	435710000	510180000		419300000	457200000	410690000		514658210	436008210	510478210		419598210	457498210	410988210		487048210	4.29362e+08		0.881559	0.120067				Rab-like protein 6	Rabl6
443210000	407810000	440710000		389510000	278830000	470330000		443508210	408108210	441008210		389808210	279128210	470628210		4.30875e+08	3.79855e+08		0.88159	0.418824				Ezrin	Ezr
66687000	120580000	107180000		63372000	89246000	106900000		66985210	120878210	107478210		63670210	89544210	107198210		98447210	86804210		0.881734	0.601241				Uncharacterized protein ZMYM6NB	Zmym6nb;Gm12942
13124000000	9179900000	9873500000		7180800000	9814100000	11379000000		13124298210	9180198210	9873798210		7181098210	9814398210	11379298210		10726098210	9.45826e+09		0.881799	0.503305				Alpha-aminoadipic semialdehyde dehydrogenase	Aldh7a1
2120700000	2440100000	2483500000		2167500000	1981800000	2063600000		2120998210	2440398210	2483798210		2167798210	1982098210	2063898210		2348398210	2.07126e+09		0.88199	0.0933939				Paladin	Pald1
2284600000	2761400000	2852100000		2224800000	2496500000	2247000000		2284898210	2761698210	2852398210		2225098210	2496798210	2247298210		2632998210	2.32306e+09		0.882289	0.189656				Myotrophin	Mtpn
47446000	27844000	0		19169000	26913000	20246000		47744210	28142210	298210		19467210	27211210	20544210		2.53949e+07	2.24075e+07		0.882365	0.841204				Brain-specific angiogenesis inhibitor 1-associated protein 2-like protein 1	Baiap2l1
212090000	271220000	311990000		230030000	240790000	230830000		212388210	271518210	312288210		230328210	241088210	231128210		265398210	2.34182e+08		0.882378	0.345357				Trophoblast glycoprotein-like	Tpbgl
422900000	517830000	464590000		362020000	437940000	440120000		423198210	518128210	464888210		362318210	438238210	440418210		468738210	413658210		0.882493	0.216847				Mitochondrial Rho GTPase 2	Rhot2;Gm20683
735760000	598910000	631210000		623380000	589580000	522110000		736058210	599208210	631508210		623678210	589878210	522408210		6.55592e+08	5.78655e+08		0.882645	0.205256				ATP-dependent RNA helicase DDX24	Ddx24
416230000	394530000	521910000		443480000	432980000	299720000		416528210	394828210	522208210		443778210	433278210	300018210		4.44522e+08	392358210		0.882653	0.438845				Glutaryl-CoA dehydrogenase, mitochondrial	Gcdh
73674000	94975000	133240000		75057000	92738000	98578000		73972210	95273210	133538210		75355210	93036210	98876210		1.00928e+08	89089210		0.882702	0.563178					Dnajc21
128380000	97854000	116730000		55468000	118130000	129060000		128678210	98152210	117028210		55766210	118428210	129358210		1.1462e+08	101184210		0.882783	0.613881				Androglobin	Adgb
233920000	173670000	181800000		138760000	222770000	158790000		234218210	173968210	182098210		139058210	223068210	159088210		1.96762e+08	173738210		0.882989	0.506518				Signal transducer and activator of transcription;Signal transducer and activator of transcription 4	Stat4
465330000	549970000	513550000		419300000	442920000	487810000		465628210	550268210	513848210		419598210	443218210	488108210		5.09915e+08	450308210		0.883105	0.133182				N-acetylglucosamine-6-sulfatase	Gns
72890000	81768000	65956000		74513000	79405000	40822000		73188210	82066210	66254210		74811210	79703210	41120210		73836210	6.52115e+07		0.883192	0.542233				Translation machinery-associated protein 16	Tma16
679610000	664910000	754670000		681210000	612190000	560640000		679908210	665208210	754968210		681508210	612488210	560938210		700028210	6.18312e+08		0.883267	0.141118				Major vault protein	Mvp
204850000	370260000	416740000		289540000	249780000	336660000		205148210	370558210	417038210		289838210	250078210	336958210		3.30915e+08	2.92292e+08		0.883283	0.605647				ATP synthase subunit delta, mitochondrial	Atp5d
174970000	84486000	200820000		119570000	132330000	154550000		175268210	84784210	201118210		119868210	132628210	154848210		1.53724e+08	1.35782e+08		0.883284	0.650684				Transmembrane protein 168	Tmem168
184190000	187060000	118030000		114610000	162170000	155360000		184488210	187358210	118328210		114908210	162468210	155658210		1.63392e+08	1.44345e+08		0.883429	0.519416				Protein zer-1 homolog	Zer1
198780000	276770000	233020000		217740000	204310000	203860000		199078210	277068210	233318210		218038210	204608210	204158210		236488210	2.08935e+08		0.88349	0.297498				HD domain-containing protein 2	Hddc2
39419000	37054000	25677000		15374000	49229000	25543000		39717210	37352210	25975210		15672210	49527210	25841210		34348210	3.03469e+07		0.883507	0.731901				Serine/threonine-protein kinase TAO3	Taok3
365850000	332550000	378280000		324320000	325880000	301090000		366148210	332848210	378578210		324618210	326178210	301388210		3.59192e+08	3.17395e+08		0.883637	0.0575708				Selenoprotein S	Vimp
1016700000	1259400000	1033800000		932350000	946540000	1045900000		1016998210	1259698210	1034098210		932648210	946838210	1046198210		1103598210	975228210		0.88368	0.209712				Protein cornichon homolog 4	Cnih4
2532800000	2702400000	2300800000		1930700000	2459100000	2269800000		2533098210	2702698210	2301098210		1930998210	2459398210	2270098210		2512298210	2.22016e+09		0.883719	0.205606				COP9 signalosome complex subunit 7a	Cops7a
343810000	325210000	317340000		295290000	290510000	285890000		344108210	325508210	317638210		295588210	290808210	286188210		3.29085e+08	2.90862e+08		0.88385	0.0100068				Zinc finger ZZ-type and EF-hand domain-containing protein 1	Zzef1
23072000	17934000	31293000		27669000	36137000	0		23370210	18232210	31591210		27967210	36435210	298210		2.43979e+07	2.15669e+07		0.883965	0.818961				Uncharacterized protein C16orf86 homolog
319500000	275960000	186890000		222400000	251080000	218080000		319798210	276258210	187188210		222698210	251378210	218378210		2.61082e+08	230818210		0.884085	0.495215				Myotubularin-related protein 2	Mtmr2
966190000	1140300000	909350000		864640000	862870000	938820000		966488210	1140598210	909648210		864938210	863168210	939118210		1005578210	8.89075e+08		0.884143	0.18978					Fubp3
142480000	155500000	162780000		50842000	178550000	177950000		142778210	155798210	163078210		51140210	178848210	178248210		1.53885e+08	1.36079e+08		0.88429	0.699283				Complement component C8 beta chain	C8b
94606000	95512000	119940000		72279000	91888000	109940000		94904210	95810210	120238210		72577210	92186210	110238210		1.03651e+08	91667210		0.884384	0.430456				T-cell activation inhibitor, mitochondrial	Tcaim;TCAIM
482070000	454850000	463660000		354420000	471430000	412730000		482368210	455148210	463958210		354718210	471728210	413028210		467158210	413158210		0.884407	0.194819				Vacuolar protein-sorting-associated protein 25	Vps25
12443000	20966000	13946000		12544000	11480000	17754000		12741210	21264210	14244210		12842210	11778210	18052210		16083210	14224210		0.884414	0.599495				Probable threonine--tRNA ligase 2, cytoplasmic	Tarsl2
3538700000	3099700000	3573800000		2557900000	3214100000	3261500000		3538998210	3099998210	3574098210		2558198210	3214398210	3261798210		3.40436e+09	3.01146e+09		0.884589	0.224222				40S ribosomal protein S23	Rps23
6117600000	7105600000	6844700000		5972100000	5636700000	6144000000		6117898210	7105898210	6844998210		5972398210	5636998210	6144298210		6689598210	5917898210		0.884642	0.080137				Dihydropyrimidinase-related protein 2	Dpysl2
614510000	423470000	466000000		414710000	502300000	413420000		614808210	423768210	466298210		415008210	502598210	413718210		5.01625e+08	4.43775e+08		0.884675	0.423432				Nurim	Nrm
245830000	233350000	225180000		205690000	155670000	261760000		246128210	233648210	225478210		205988210	155968210	262058210		2.35085e+08	2.08005e+08		0.884808	0.43473				Serine/threonine-protein kinase TBK1	Tbk1
238750000	208020000	268350000		231760000	166690000	234290000		239048210	208318210	268648210		232058210	166988210	234588210		2.38672e+08	2.11212e+08		0.884946	0.384657				Kinesin-like protein KIF15	Kif15
910770000	881330000	1169800000		749530000	1077100000	795150000		911068210	881628210	1170098210		749828210	1077398210	795448210		987598210	8.74225e+08		0.885203	0.455809				Mannose-P-dolichol utilization defect 1 protein	Mpdu1
7739900000	8240200000	8208500000		6973000000	7248200000	7192000000		7740198210	8240498210	8208798210		6973298210	7248498210	7192298210		8.06316e+09	7.13803e+09		0.885264	0.00709702				Phosphoglycerate kinase 1;Phosphoglycerate kinase	Pgk1
3832500000	3824000000	3240100000		3374200000	2557800000	3714700000		3832798210	3824298210	3240398210		3374498210	2558098210	3714998210		3632498210	3.21586e+09		0.885304	0.351359				Multifunctional protein ADE2;Phosphoribosylaminoimidazole-succinocarboxamide synthase;Phosphoribosylaminoimidazole carboxylase	Paics
270940000	277350000	254100000		208250000	237370000	264670000		271238210	277648210	254398210		208548210	237668210	264968210		2.67762e+08	2.37062e+08		0.885346	0.157927				Zinc finger SWIM domain-containing protein 8	Zswim8
7787500000	8410100000	10263000000		6662700000	7527700000	9238000000		7787798210	8410398210	10263298210		6662998210	7527998210	9238298210		8820498210	7.80976e+09		0.885411	0.394636				Alpha-1-antitrypsin 1-4	Serpina1d
1315100000	1548700000	1420000000		1068600000	1277200000	1447500000		1315398210	1548998210	1420298210		1068898210	1277498210	1447798210		1.42823e+09	1.26473e+09		0.885523	0.272857				Ubiquitin-associated protein 2-like	Ubap2l
510640000	494090000	578540000		383210000	525260000	493540000		510938210	494388210	578838210		383508210	525558210	493838210		5.28055e+08	4.67635e+08		0.88558	0.295164				Protein CDV3	Cdv3
6744600000	5700000000	5500900000		5421300000	5332000000	5139400000		6744898210	5700298210	5501198210		5421598210	5332298210	5139698210		5.98213e+09	5.29786e+09		0.885615	0.157893				Ubiquitin thioesterase OTUB1	Otub1
5222500000	6228100000	6414800000		5503000000	5198000000	5124500000		5222798210	6228398210	6415098210		5503298210	5198298210	5124798210		5.95543e+09	5.27546e+09		0.885824	0.15454				Puromycin-sensitive aminopeptidase	Npepps
1532800000	1292700000	1206100000		1154500000	1289000000	1127800000		1533098210	1292998210	1206398210		1154798210	1289298210	1128098210		1.34416e+09	1.19073e+09		0.885852	0.234521				Metaxin-1	Mtx1
1376800000	1295100000	1349200000		958420000	1355700000	1248100000		1377098210	1295398210	1349498210		958718210	1355998210	1248398210		1.34066e+09	1.1877e+09		0.885907	0.274944				Abhydrolase domain-containing protein 4	Abhd4
79514000	80464000	81952000		75166000	65999000	73076000		79812210	80762210	82250210		75464210	66297210	73374210		8.09415e+07	7.17119e+07		0.885971	0.0321665				Mediator of RNA polymerase II transcription subunit 31	Med31
0	23154000	29887000		23059000	0	23835000		298210	23452210	30185210		23357210	298210	24133210		1.79785e+07	1.59295e+07		0.886031	0.872298				5-methylcytosine rRNA methyltransferase NSUN4	Nsun4
134220000	85062000	81111000		61395000	98642000	106040000		134518210	85360210	81409210		61693210	98940210	106338210		100429210	8.89905e+07		0.886102	0.630096					BC048502
213270000	176000000	200310000		159190000	175000000	188220000		213568210	176298210	200608210		159488210	175298210	188518210		1.96825e+08	1.74435e+08		0.886244	0.179399				EPM2A-interacting protein 1	Epm2aip1
164180000	180410000	200230000		134780000	210560000	137430000		164478210	180708210	200528210		135078210	210858210	137728210		1.81905e+08	1.61222e+08		0.886296	0.485285				Tyrosine-protein kinase Fer	Fer
2757700000	3408500000	3238100000		2822300000	2726100000	2787400000		2757998210	3408798210	3238398210		2822598210	2726398210	2787698210		3.13506e+09	2778898210		0.886393	0.14468				Cingulin	Cgn
6877700000	7802700000	7993000000		6686400000	6789200000	6633800000		6877998210	7802998210	7993298210		6686698210	6789498210	6634098210		7558098210	6.70343e+09		0.88692	0.0697142				Histone deacetylase 6	Hdac6
55505000	56125000	61838000		50415000	57797000	45579000		55803210	56423210	62136210		50713210	58095210	45877210		5.81209e+07	5.15619e+07		0.887149	0.183581				DNA topoisomerase;DNA topoisomerase 3-alpha	Top3a
368350000	307090000	306820000		304850000	275450000	291050000		368648210	307388210	307118210		305148210	275748210	291348210		327718210	290748210		0.88719	0.170535				Aladin	Aaas
1785300000	1986500000	1981300000		1561400000	1792600000	1750900000		1785598210	1986798210	1981598210		1561698210	1792898210	1751198210		1917998210	1.70193e+09		0.887348	0.0902974				Cellular retinoic acid-binding protein 1	Crabp1
7533600000	5937400000	5095300000		5057700000	5862000000	5558300000		7533898210	5937698210	5095598210		5057998210	5862298210	5558598210		6.18906e+09	5.49296e+09		0.887527	0.407284				Leucine-rich repeat-containing protein 46	Lrrc46
59397000	56334000	0		29805000	35817000	36998000		59695210	56632210	298210		30103210	36115210	37296210		38875210	3.45049e+07		0.88758	0.833116				Ribonuclease UK114	Hrsp12
675530000	906360000	938940000		636210000	811720000	789670000		675828210	906658210	939238210		636508210	812018210	789968210		8.40575e+08	7.46165e+08		0.887684	0.396866				EH domain-containing protein 4	Ehd4
1473700000	1337800000	1357200000		1297000000	1223200000	1180200000		1473998210	1338098210	1357498210		1297298210	1223498210	1180498210		1.38986e+09	1.23376e+09		0.887687	0.0455992				Eukaryotic translation elongation factor 1 epsilon-1	Eef1e1
381710000	387900000	431440000		383750000	281490000	400820000		382008210	388198210	431738210		384048210	281788210	401118210		400648210	3.55652e+08		0.88769	0.327903				HAUS augmin-like complex subunit 4	Haus4
37742000	35639000	31366000		41975000	32324000	18586000		38040210	35937210	31664210		42273210	32622210	18884210		3.52139e+07	3.12599e+07		0.887715	0.604362				M-phase phosphoprotein 6	Mphosph6
126380000	115390000	101760000		92150000	97292000	115420000		126678210	115688210	102058210		92448210	97590210	115718210		114808210	1.01919e+08		0.887732	0.267954				WW domain-containing adapter protein with coiled-coil	Wac
87457000	106060000	107650000		82330000	101500000	83447000		87755210	106358210	107948210		82628210	101798210	83745210		100687210	8.93905e+07		0.887804	0.276753				Dynamin-binding protein	Dnmbp
2039600000	3567400000	3150600000		2598000000	2896700000	2280500000		2039898210	3567698210	3150898210		2598298210	2896998210	2280798210		2919498210	2.59203e+09		0.887835	0.54009				Histidine--tRNA ligase, cytoplasmic	Hars
38686000	28589000	54592000		39955000	31493000	36673000		38984210	28887210	54890210		40253210	31791210	36971210		4.09205e+07	3.63385e+07		0.888027	0.59567				Microtubule-actin cross-linking factor 1	Macf1
290630000	275370000	313140000		244150000	283810000	252640000		290928210	275668210	313438210		244448210	284108210	252938210		2.93345e+08	260498210		0.888027	0.114137				Kinesin light chain 4	Klc4
1462900000	1403200000	1318800000		1182100000	1277300000	1256900000		1463198210	1403498210	1319098210		1182398210	1277598210	1257198210		1.39526e+09	1.23906e+09		0.88805	0.0372086					Fuk
44847000	38900000	68131000		42981000	53822000	37999000		45145210	39198210	68429210		43279210	54120210	38297210		50924210	45232210		0.888226	0.602047				Glutamyl aminopeptidase	Enpep
718480000	796580000	585070000		643410000	629020000	592920000		718778210	796878210	585368210		643708210	629318210	593218210		7.00342e+08	6.22082e+08		0.888255	0.285594				DNA-directed RNA polymerase II subunit RPB3	Polr2c
1365200000	1414300000	1323300000		1183100000	1253100000	1208200000		1365498210	1414598210	1323598210		1183398210	1253398210	1208498210		1367898210	1215098210		0.888296	0.010147				MICOS complex subunit Mic19	Chchd3
165720000	183180000	195290000		163420000	142030000	177870000		166018210	183478210	195588210		163718210	142328210	178168210		1.81695e+08	1.61405e+08		0.888329	0.207061				RNA-binding protein PNO1	Pno1
2226000000	2851500000	2598400000		2068700000	2252300000	2498000000		2226298210	2851798210	2598698210		2068998210	2252598210	2498298210		2.55893e+09	2273298210		0.888378	0.264241				Actin-related protein 2/3 complex subunit 1B	Arpc1b
170500000	176690000	221570000		191090000	160270000	153940000		170798210	176988210	221868210		191388210	160568210	154238210		1.89885e+08	1.68732e+08		0.888599	0.344761				Telomere length regulation protein TEL2 homolog	Telo2
10560000000	9097000000	9283700000		7552500000	9341800000	8827000000		10560298210	9097298210	9283998210		7552798210	9342098210	8827298210		9647198210	8.57406e+09		0.888762	0.201576				Carnitine O-palmitoyltransferase 2, mitochondrial	Cpt2
1687400000	1870300000	1741400000		1624800000	1556300000	1529000000		1687698210	1870598210	1741698210		1625098210	1556598210	1529298210		1.76666e+09	1.57033e+09		0.888868	0.0327829				Propionyl-CoA carboxylase beta chain, mitochondrial	Pccb
4772100000	4892000000	4479900000		4139700000	3360800000	5073500000		4772398210	4892298210	4480198210		4139998210	3361098210	5073798210		4.71496e+09	4.19163e+09		0.889006	0.362813				UBX domain-containing protein 1	Ubxn1
5868400	12579000	0		16303000	0	0		6166610	12877210	298210		16601210	298210	298210		6.44734e+06	5.73254e+06		0.889133	0.918199				U3 small nucleolar RNA-associated protein 14 homolog A	Utp14a
226160000	265810000	304860000		255400000	249800000	203260000		226458210	266108210	305158210		255698210	250098210	203558210		265908210	2.36452e+08		0.889222	0.353574				RAC-alpha serine/threonine-protein kinase	Akt1
2691500000	2478200000	2668800000		2363200000	2325200000	2281800000		2691798210	2478498210	2669098210		2363498210	2325498210	2282098210		2.61313e+09	2323698210		0.889239	0.0155781				Vigilin	Hdlbp
0	0	21963000		0	19432000	0		298210	298210	22261210		298210	19730210	298210		7619210	6.77554e+06		0.889271	0.93537				Fragile X mental retardation 1 neighbor protein	Fmr1nb
696490000	593370000	441220000		397430000	630890000	511030000		696788210	593668210	441518210		397728210	631188210	511328210		5.77325e+08	5.13415e+08		0.8893	0.558272				Threonine synthase-like 1	Thnsl1
81033000	105730000	102220000		102960000	69355000	84599000		81331210	106028210	102518210		103258210	69653210	84897210		9.66259e+07	85936210		0.889371	0.437438				182 kDa tankyrase-1-binding protein	Tnks1bp1
600560000	616980000	588860000		496020000	524970000	585720000		600858210	617278210	589158210		496318210	525268210	586018210		6.02432e+08	535868210		0.889509	0.07384				Ufm1-specific protease 2	Ufsp2
[truncated: 5,048 more rows]
