# Supplementary material for: ZMYND10 functions in a chaperone relay during axonemal dynein assembly
Source: eLife. 2018 Jun 19;7:e34389. doi: 10.7554/eLife.34389 (PMC6044906; doi:10.7554/eLife.34389)
Supplement: Supplementary file 2. — Filtered by significance. Endogenous ZMYND10 was immunoprecipitated from total extracts of control wild type testes (P30) with two commercial polyclonal antibodies (Proteintech and Sigma). Proteins that co-precipitated with ZMYND10 in triplicate experiments were identified by tandem Mass Spectrometry and ranked according to fold-change (FC Ratio) enrichment and significance (t-test p-value) in the ZMYND10 specific pull-downs versus control immunoglobulin pull-downs. Proteins that commonly precipitated with ZMYND10 using the two separate polyclonal antibodies were considered putative interactors. A ranked list of these common hits is provided with ZMYND10 and the interactors investigated in this study that is FKBP8, HSP90AB1 and DNAH17 highlighted in green. [file elife-34389-supp2.xlsx]

## Sheet: ZMYND10 Interactors
Supplementary File 2. Endogenous ZMYND10 immunoprecipitation protein interactor profiling. Filtered by significance
Common interactors ranked by significance		Zmynd10 Ptech Testis interactome		Zmynd10 Sigma Testis interactome
Gene	Protein name	Log2 fold change	-Log10 p-value	Log2 fold change	-Log10 p-value
Zmynd10	Zinc finger MYND domain-containing protein 10	10.8553	5.87743	9.91459	8.7999
Slc4a2	Anion exchange protein 2	10.8078	7.91185	12.359	7.28929
Ccdc91	Coiled-coil domain-containing protein 91	11.8357	7.82807	3.18176	2.67939
Pvrl2	Poliovirus receptor-related protein 2	8.6563	7.69381	8.13116	5.15823
Ankle2	Ankyrin repeat and LEM domain protein 2	6.82331	6.24222	0.945801	1.44673
Pcmt1	Protein-L-isoaspartate O-methyltransferase	2.11719	4.83148	1.83422	6.31295
Wrn	Werner syndrome ATP-dependent helicase	4.7188	4.60894	5.14944	2.89016
Slc16a1	Monocarboxylate transporter 1	0.828647	4.469	1.07167	4.75593
Atp6v1h	V-type proton ATPase subunit H	4.55995	4.46252	4.49807	4.29974
Rad18	E3 ubiquitin-protein ligase RAD18	1.81692	3.96267	0.779939	2.32725
Gnai2	Guanine nucleotide-binding protein G(i)2	0.954136	3.83585	0.855788	3.45801
Fkbp8	Peptidyl-prolyl cis-trans isomerase FKBP8	2.62908	3.76217	3.04133	3.48561
Tmx4	Thioredoxin-related transmembrane protein4	1.70453	3.50581	0.702713	1.36391
Hspa14	Heat shock 70 kDa protein 14	1.07977	3.15948	0.580005	2.00733
Gnao1	Guanine nucleotide-binding protein G(o)1	0.606364	2.56223	0.634334	2.44288
Yipf5	Protein YIPF5	1.22332	2.55977	0.637021	1.32323
Tor1aip1	Torsin-1A-interacting protein 1	0.651978	2.54086	0.695879	2.16146
Dync1h1	Cytoplasmic dynein 1 heavy chain 1	1.02052	2.44248	0.683891	1.8924
Letm1	LETM1/EF-hand domain-containing protein 1	3.54175	2.35342	3.79519	3.38538
Clgn	Calmegin	0.741492	2.27235	0.637017	1.94217
Adam2	Disintegrin domain-containing protein 2	0.865849	2.27022	0.641394	1.72168
Rpn1	Dolichyl-glycosyltransferase	0.551179	2.23345	0.534493	1.77885
Rab1b	Ras-related protein Rab-1B	0.822899	2.2188	0.640035	2.07966
Dnah17	Dynein heavy chain 17, axonemal	2.54145	2.20956	1.53141	1.39163
Hsp90ab1	Heat shock protein HSP 90-beta	0.613381	2.14356	0.808437	2.70975
Nmnat3	Nicotinamide adenylyltransferase 3	0.840418	2.10635	0.661123	1.67028
Fmnl3	Formin-like protein 3	2.38521	2.01189	7.8025	5.74072
Nelfb	Negative elongation factor B	2.0873	1.95417	3.83465	2.54095
Derl2	Derlin-2	1.15987	1.79708	1.7176	2.62741
Alg2	Alpha-1,3/1,6-mannosyltransferase ALG2	2.09128	1.6845	2.36355	2.17866
Slc27a4	Long-chain fatty acid transport protein 4	1.38223	1.6752	1.83115	2.38718
Rit1	GTP-binding protein Rit1	0.788275	1.67312	0.642593	1.30566
Rapgef2	Rap guanine nucleotide exchange factor 2	0.768998	1.65411	0.671425	1.32649
Wdr35	WD repeat-containing protein 35	0.750228	1.56203	1.26137	2.67076
Kpna2	Importin subunit alpha-1	0.759381	1.4864	0.970878	1.96806
rp9	Retinitis pigmentosa 9 protein homolog	1.59533	1.48344	2.42297	1.90169
Snx5	Sorting nexin-5	2.13814	1.41399	1.97714	1.30561
Epb41l2	Band 4.1-like protein 2	0.65062	1.41077	0.710223	1.48935
Rab18	Ras-related protein Rab-18	0.512391	1.39128	0.564206	1.53596
Smarca5	SWI/SNF- regulator of chromatin subfamily A5	1.81902	1.37574	1.8833	1.41414
Usp5	Ubiquitin carboxyl-terminal hydrolase	1.10073	1.35201	0.962066	1.60537
Sec23ip	SEC23-interacting protein	0.507392	1.3293	0.830273	2.20247
Dtna	Dystrobrevin alpha	1.75845	1.31445	1.86677	1.39627
