# Supplementary material for: ZMYND10 functions in a chaperone relay during axonemal dynein assembly
Source: eLife. 2018 Jun 19;7:e34389. doi: 10.7554/eLife.34389 (PMC6044906; doi:10.7554/eLife.34389)
Supplement: Supplementary file 3. [file elife-34389-supp3.xlsx]

## Sheet: Table 1
Supplementary Table 3: Reagents
Antibodies
Antigen	Antibody	Host	Source	Application
Acetylated α-tubulin	6-11B-1	Mouse	Sigma	IF (1:500-2000)
β-actin	AC-15	Mouse	Sigma	WB (1:5000)
c-Myc	M5546	Mouse	Sigma	WB (1:4000)
DNAAF1/LRRC50	NBP2-01936	Rabbit	Novus Biologicals	WB (1:5000)
DNAH5	HPA037470	Rabbit	Sigma	IF (1:100), PLA; WB (1:5000)
DNAH5 (Hiroyuki Takeda)	custom made	Rabbit	Custom made	IF (1:100), PLA; WB (1:5000)
DNAH9 (Hiroyuki Takeda)	custom made	Rabbit	Custom made	IF (1:100), PLA; WB (1:5000)
DNAI1	ab171964	Rabbit	Abcam	WB (1:5000)
DNAI2	M01 clone IC8	Mouse	Abnova	IF (1:100), PLA; WB (1:5000)
DNAI2	17533-1-AP	Rabbit	Proteintech	IF (1:100); WB (1:5000); IP (1.5μg-3μg/IP)
DNALI1	N-13	Goat	Santa Cruz	IF (1:75); WB (1:5000)
FKBP8	11173-1-AP	Rabbit	Proteintech	WB (1:5000); IP (1.5μg-3μg/IP)
FKBP8	MAB3580	Mouse	R&D Systems	WB (1:5000)
γ tubulin	GTU-88	Mouse	Abcam	IF (1:500)
GAPDH	ab8245	Mouse	Abcam	WB (1:5000)
tGFP	TA150041	Rabbit	Origene	IF (1:200)
GFP	RbAb GFP	Rabbit	Molecular Probes	IF (1:500)
GFP	FL; sc-8334	Rabbit pAb	Santa Cruz	WB (1:5000); IP (1.5μg-3μg/IP)
GRP-94/HSP90B1	clone 9G10	Rat mAb	Thermo Scientific	IF (1:100); WB (1:5000)
HSP70	K-20	Goat	Santa Cruz	WB (1:5000)
HSP90AB1	MAB32861	Mouse	R&D Systems	WB (1:5000)
HSP90	Clone F-8	Mouse	Santa Cruz	WB (1:5000)
LRRC6 (Hiroshi Hamada)	custom made	Rabbit	Custom made	WB (1:5000)
Sentan	HPA043322	Rabbit pAb	Atlas Antibodies	IF (1:150)
ZMYND10	14431-1-AP	Rabbit pAb	Proteintech	WB (1:5000); IF (1:100); IP (1.5μg-3μg/IP)
ZMYND10	HPA0352355	Rabbit pAb	Sigma	WB (1:5000); IF (1:100); IP (1.5μg-3μg/IP)
Plasmids
pCMV6-Zmynd10-tGFP	Mouse Zmynd10 ORF with C-terminal turbo-GFP tag under CMV promoter in plasmid with ampicillin resistance gene			Origene
pCMV6-Dnaaf5-tGFP	Mouse Dnaaf5 ORF with C-terminal turbo-GFP tag under CMV promoter in plasmid with ampicillin resistance gene			Origene
pRK5-Myc-LRRC6	Human full length ORF with myc tag			Zariwala et. Al American J of Hum Genetics. 2013
RT qPCR Primers
Gene	Species	Primers			Universal Probe Library No. (Roche)
Dnahc5	Mouse	AAGCTGTTGCACCAGACCAT/ CCCAGGTGGCAGTTCTGTAG			88
Dnali1	Mouse	AGTTCCTGAAACGGACCAAC/ TGAGACCCATGTGGAAATGA			97
Zmynd10	Mouse	GCCATCCTTGATGCAACTATC/ CAATCAGCTCCTCCACCAG			64
Tbp	Mouse	GGGGAGCTGTGATGTGAAGT/ CCAGGAAATAATTCTGGCTCA			97

## Sheet: Table 2
Antigen	Host Species	Dilution	Application
ECL α-Mouse IgG, HRP-conjugated	Sheep	1:15000-1:20000	WB
ECL α-Rabbit IgG, HRP-conjugated	Sheep	1:15000-1:20000	WB
α-goat IgG-HRP	Donkey	1:10000-1:15000	WB
Alexa 488, 594,647-conjugated-α-Mouse	Donkey	1:500	IF
Alexa 488, 594, 647-conjugated-α-Goat	Donkey	1:500	IF
Alexa 488, 594, 647-conjugated-α-Rabbit	Donkey	1:500	IF
