# Supplementary figures and images for: ZMYND10 functions in a chaperone relay during axonemal dynein assembly
Source: eLife journal article supplement (doi:10.7554/elife.34389), 2018-06-19

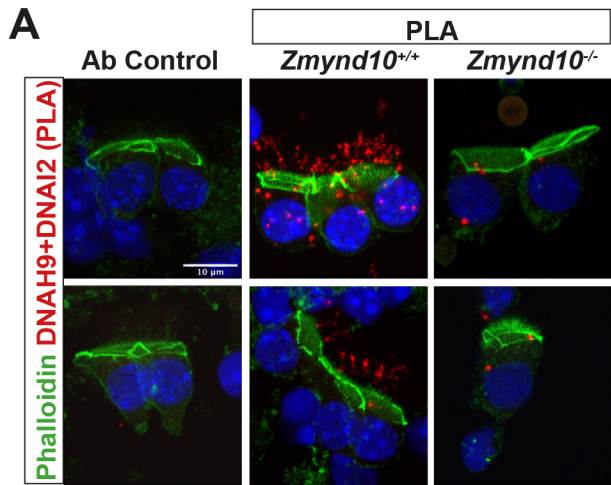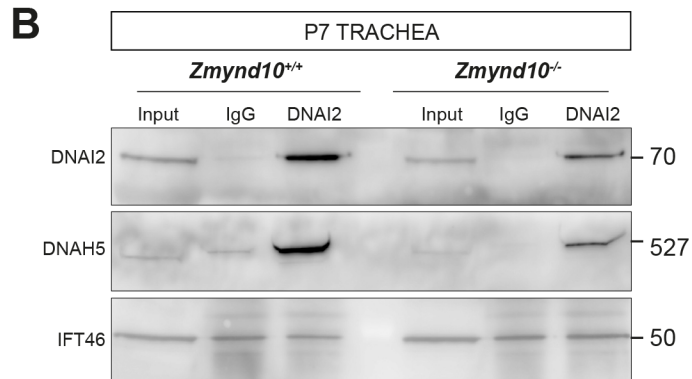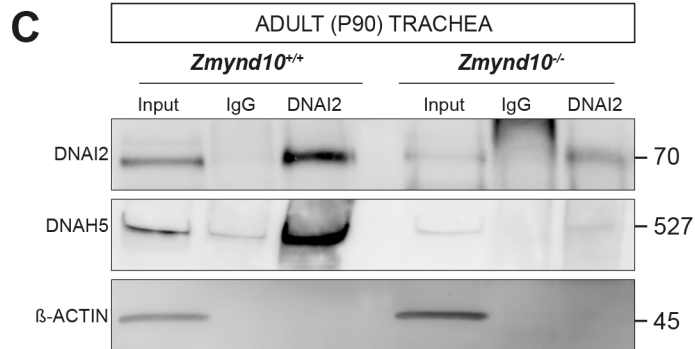

Supplement: supp [file elife-34389-supp-v1.zip]

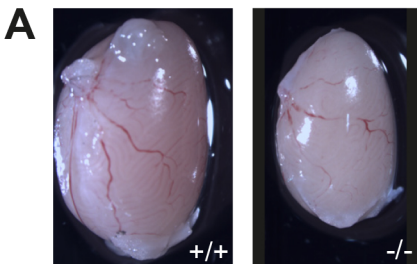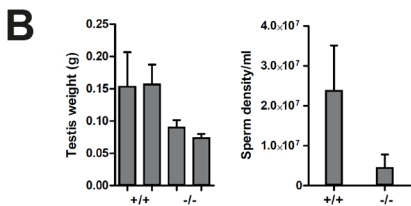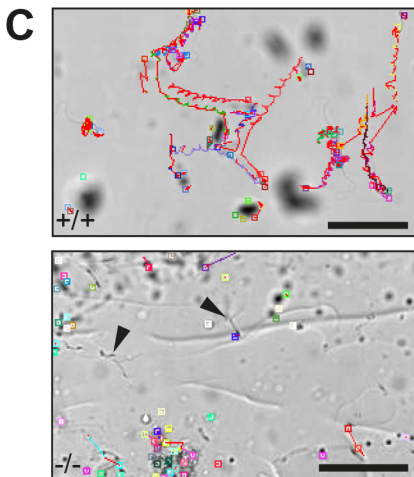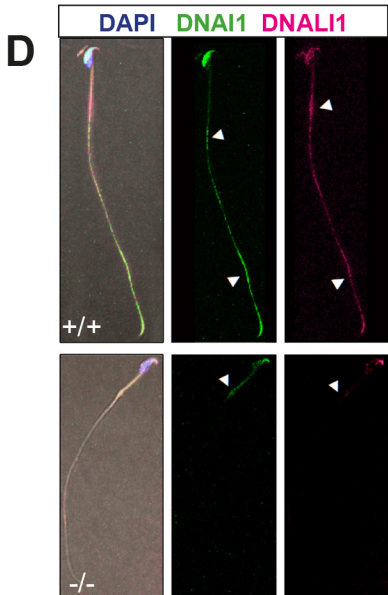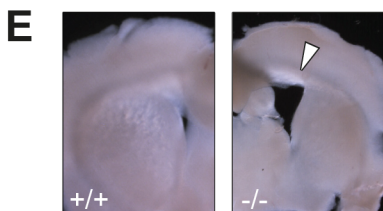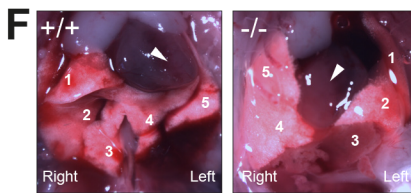

Supplement: supp [file elife-34389-supp-v1.zip]

**A** Control *Zmynd10*<sup>-/-</sup>

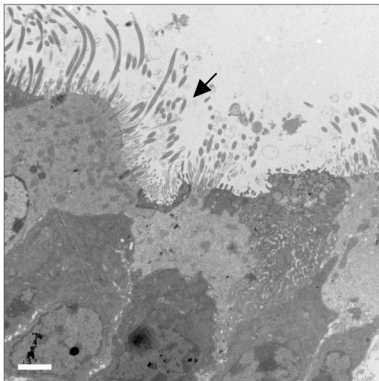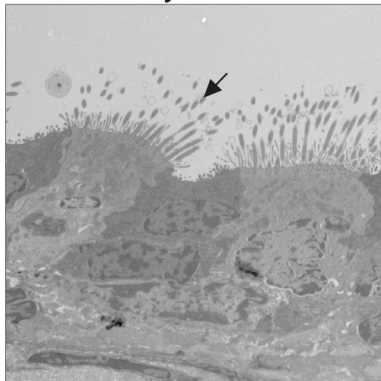

**B** Control *Zmynd10*<sup>-/-</sup>

DAPI ACTUB  
PHALLOIDIN

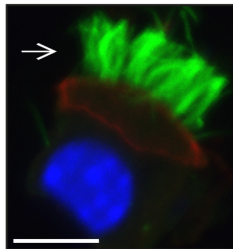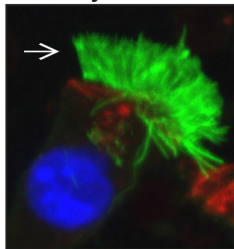

Supplement: supp [file elife-34389-supp-v1.zip]
